# Supplementary material
Source: MDPI journal article supplement (https://www.mdpi.com/2313-433X/9/10/220)
Supplement: s1 [file s1]

Supplementary table S2. Confusion matrices from cross validation of all classifiers (Single-multiclass).

| Single-multiclass |                       | Predicted labels |               |      |             |                       |            |                       |        |           | Sum |
|-------------------|-----------------------|------------------|---------------|------|-------------|-----------------------|------------|-----------------------|--------|-----------|-----|
|                   |                       | Crescentic       | Endocapillary | FSGS | Hypertrophy | Membranoproliferative | Membranous | Mesangioproliferative | Normal | Sclerosed |     |
|                   | True labels           |                  |               |      |             |                       |            |                       |        |           |     |
| Fold1             | Crescentic            | 25               | 0             | 1    | 1           | 0                     | 0          | 2                     | 0      | 0         | 29  |
|                   | Endocapillary         | 6                | 24            | 2    | 0           | 0                     | 0          | 4                     | 1      | 0         | 37  |
|                   | FSGS                  | 6                | 1             | 27   | 5           | 2                     | 3          | 6                     | 4      | 0         | 54  |
|                   | Hypertrophy           | 0                | 0             | 0    | 29          | 0                     | 1          | 1                     | 2      | 0         | 33  |
|                   | Membranoproliferative | 3                | 5             | 0    | 0           | 34                    | 1          | 2                     | 1      | 0         | 46  |
|                   | Membranous            | 0                | 1             | 3    | 1           | 0                     | 29         | 1                     | 0      | 0         | 35  |
|                   | Mesangioproliferative | 0                | 2             | 6    | 2           | 0                     | 2          | 30                    | 0      | 0         | 42  |
|                   | Normal                | 0                | 0             | 6    | 10          | 0                     | 8          | 9                     | 63     | 0         | 96  |
|                   | Sclerosed             | 0                | 0             | 1    | 0           | 0                     | 0          | 0                     | 0      | 44        | 45  |
| Fold2             | Crescentic            | 23               | 3             | 0    | 0           | 1                     | 0          | 2                     | 0      | 0         | 29  |
|                   | Endocapillary         | 2                | 31            | 0    | 0           | 2                     | 0          | 1                     | 1      | 0         | 37  |
|                   | FSGS                  | 4                | 5             | 21   | 5           | 3                     | 3          | 9                     | 4      | 0         | 54  |
|                   | Hypertrophy           | 0                | 0             | 0    | 26          | 0                     | 2          | 1                     | 4      | 0         | 33  |
|                   | Membranoproliferative | 0                | 9             | 0    | 0           | 36                    | 0          | 1                     | 0      | 0         | 46  |
|                   | Membranous            | 1                | 1             | 0    | 1           | 1                     | 28         | 3                     | 0      | 0         | 35  |
|                   | Mesangioproliferative | 0                | 3             | 2    | 0           | 8                     | 1          | 28                    | 0      | 0         | 42  |
|                   | Normal                | 1                | 3             | 2    | 6           | 1                     | 5          | 20                    | 58     | 0         | 96  |
|                   | Sclerosed             | 0                | 0             | 1    | 0           | 0                     | 0          | 0                     | 0      | 44        | 45  |
| Fold3             | Crescentic            | 26               | 1             | 1    | 0           | 0                     | 0          | 1                     | 0      | 0         | 29  |
|                   | Endocapillary         | 2                | 32            | 2    | 0           | 0                     | 0          | 0                     | 1      | 0         | 37  |
|                   | FSGS                  | 5                | 3             | 32   | 5           | 2                     | 1          | 3                     | 3      | 0         | 54  |
|                   | Hypertrophy           | 0                | 0             | 1    | 30          | 0                     | 0          | 1                     | 1      | 0         | 33  |
|                   | Membranoproliferative | 1                | 13            | 1    | 0           | 31                    | 0          | 0                     | 0      | 0         | 46  |
|                   | Membranous            | 0                | 1             | 5    | 1           | 0                     | 25         | 2                     | 1      | 0         | 35  |
|                   | Mesangioproliferative | 0                | 5             | 17   | 0           | 3                     | 1          | 16                    | 0      | 0         | 42  |
|                   | Normal                | 1                | 2             | 15   | 10          | 0                     | 3          | 5                     | 60     | 0         | 96  |
|                   | Sclerosed             | 1                | 0             | 0    | 0           | 0                     | 0          | 0                     | 0      | 44        | 45  |
| Fold4             | Crescentic            | 25               | 0             | 1    | 1           | 1                     | 0          | 1                     | 0      | 0         | 29  |
|                   | Endocapillary         | 4                | 26            | 1    | 0           | 3                     | 1          | 1                     | 1      | 0         | 37  |
|                   | FSGS                  | 7                | 3             | 25   | 5           | 4                     | 4          | 1                     | 5      | 0         | 54  |
|                   | Hypertrophy           | 0                | 0             | 0    | 31          | 0                     | 0          | 0                     | 2      | 0         | 33  |
|                   | Membranoproliferative | 1                | 8             | 0    | 0           | 37                    | 0          | 0                     | 0      | 0         | 46  |
|                   | Membranous            | 0                | 0             | 1    | 1           | 1                     | 30         | 1                     | 1      | 0         | 35  |
|                   | Mesangioproliferative | 1                | 3             | 12   | 2           | 2                     | 2          | 20                    | 0      | 0         | 42  |
|                   | Normal                | 0                | 0             | 9    | 12          | 0                     | 8          | 3                     | 64     | 0         | 96  |
|                   | Sclerosed             | 0                | 0             | 1    | 0           | 0                     | 0          | 0                     | 0      | 44        | 45  |
| Fold5             | Crescentic            | 23               | 0             | 1    | 1           | 1                     | 0          | 3                     | 0      | 0         | 29  |
|                   | Endocapillary         | 3                | 22            | 2    | 0           | 5                     | 1          | 2                     | 2      | 0         | 37  |
|                   | FSGS                  | 3                | 1             | 24   | 6           | 3                     | 4          | 7                     | 4      | 2         | 54  |
|                   | Hypertrophy           | 0                | 0             | 1    | 29          | 0                     | 1          | 0                     | 2      | 0         | 33  |
|                   | Membranoproliferative | 2                | 4             | 0    | 0           | 38                    | 0          | 1                     | 1      | 0         | 46  |
|                   | Membranous            | 0                | 0             | 0    | 1           | 1                     | 31         | 2                     | 0      | 0         | 35  |
|                   | Mesangioproliferative | 0                | 1             | 3    | 1           | 4                     | 3          | 29                    | 1      | 0         | 42  |
|                   | Normal                | 0                | 0             | 7    | 10          | 1                     | 10         | 6                     | 62     | 0         | 96  |
|                   | Sclerosed             | 0                | 0             | 1    | 0           | 0                     | 0          | 0                     | 0      | 44        | 45  |

Supplementary table S2 (continued). Confusion matrices from cross validation of all classifiers (Multiple-binary).

| Multiple-binary |                       | Predicted labels |               |      |             |                       |            |                       |        |           | Sum |
|-----------------|-----------------------|------------------|---------------|------|-------------|-----------------------|------------|-----------------------|--------|-----------|-----|
|                 |                       | Crescentic       | Endocapillary | FSGS | Hypertrophy | Membranoproliferative | Membranous | Mesangioproliferative | Normal | Sclerosed |     |
|                 | True labels           |                  |               |      |             |                       |            |                       |        |           |     |
| Fold1           | Crescentic            | 23               | 0             | 0    | 2           | 1                     | 0          | 2                     | 0      | 1         | 29  |
|                 | Endocapillary         | 7                | 14            | 1    | 3           | 5                     | 0          | 3                     | 3      | 1         | 37  |
|                 | FSGS                  | 4                | 2             | 22   | 8           | 3                     | 2          | 4                     | 6      | 3         | 54  |
|                 | Hypertrophy           | 1                | 0             | 0    | 29          | 0                     | 2          | 1                     | 0      | 0         | 33  |
|                 | Membranoproliferative | 3                | 4             | 0    | 0           | 39                    | 0          | 0                     | 0      | 0         | 46  |
|                 | Membranous            | 0                | 0             | 0    | 2           | 2                     | 27         | 4                     | 0      | 0         | 35  |
|                 | Mesangioproliferative | 1                | 1             | 3    | 0           | 11                    | 2          | 21                    | 3      | 0         | 42  |
|                 | Normal                | 0                | 0             | 7    | 13          | 1                     | 6          | 8                     | 59     | 2         | 96  |
| Fold2           | Sclerosed             | 0                | 0             | 1    | 0           | 0                     | 0          | 0                     | 0      | 44        | 45  |
|                 | Crescentic            | 24               | 0             | 1    | 1           | 1                     | 0          | 1                     | 0      | 1         | 29  |
|                 | Endocapillary         | 8                | 17            | 0    | 1           | 5                     | 0          | 3                     | 2      | 1         | 37  |
|                 | FSGS                  | 6                | 1             | 25   | 7           | 3                     | 2          | 4                     | 6      | 0         | 54  |
|                 | Hypertrophy           | 1                | 0             | 1    | 25          | 2                     | 1          | 0                     | 3      | 0         | 33  |
|                 | Membranoproliferative | 2                | 4             | 1    | 0           | 37                    | 1          | 1                     | 0      | 0         | 46  |
|                 | Membranous            | 0                | 0             | 0    | 2           | 1                     | 29         | 2                     | 1      | 0         | 35  |
|                 | Mesangioproliferative | 3                | 0             | 8    | 0           | 9                     | 2          | 20                    | 0      | 0         | 42  |
| Fold3           | Normal                | 1                | 0             | 12   | 10          | 3                     | 3          | 3                     | 63     | 1         | 96  |
|                 | Sclerosed             | 0                | 0             | 1    | 0           | 0                     | 0          | 0                     | 0      | 44        | 45  |
|                 | Crescentic            | 20               | 2             | 2    | 1           | 1                     | 0          | 1                     | 0      | 2         | 29  |
|                 | Endocapillary         | 5                | 24            | 1    | 2           | 1                     | 0          | 2                     | 1      | 1         | 37  |
|                 | FSGS                  | 1                | 3             | 23   | 7           | 3                     | 5          | 3                     | 6      | 3         | 54  |
|                 | Hypertrophy           | 1                | 0             | 1    | 27          | 0                     | 3          | 0                     | 1      | 0         | 33  |
|                 | Membranoproliferative | 1                | 8             | 1    | 0           | 35                    | 1          | 0                     | 0      | 0         | 46  |
|                 | Membranous            | 0                | 0             | 2    | 1           | 1                     | 29         | 2                     | 0      | 0         | 35  |
| Fold4           | Mesangioproliferative | 1                | 1             | 9    | 0           | 5                     | 1          | 22                    | 3      | 0         | 42  |
|                 | Normal                | 1                | 0             | 12   | 11          | 0                     | 8          | 2                     | 61     | 1         | 96  |
|                 | Sclerosed             | 0                | 0             | 1    | 0           | 0                     | 0          | 0                     | 0      | 44        | 45  |
|                 | Crescentic            | 22               | 1             | 3    | 1           | 0                     | 0          | 1                     | 0      | 1         | 29  |
|                 | Endocapillary         | 3                | 24            | 0    | 1           | 1                     | 0          | 5                     | 2      | 1         | 37  |
|                 | FSGS                  | 4                | 2             | 23   | 10          | 2                     | 2          | 5                     | 5      | 1         | 54  |
|                 | Hypertrophy           | 1                | 0             | 0    | 27          | 0                     | 3          | 1                     | 1      | 0         | 33  |
|                 | Membranoproliferative | 2                | 8             | 1    | 0           | 34                    | 0          | 1                     | 0      | 0         | 46  |
| Fold5           | Membranous            | 0                | 0             | 1    | 2           | 0                     | 31         | 1                     | 0      | 0         | 35  |
|                 | Mesangioproliferative | 0                | 1             | 8    | 1           | 4                     | 3          | 24                    | 1      | 0         | 42  |
|                 | Normal                | 1                | 0             | 12   | 10          | 2                     | 8          | 9                     | 54     | 0         | 96  |
|                 | Sclerosed             | 0                | 0             | 1    | 0           | 0                     | 0          | 0                     | 0      | 44        | 45  |
|                 | Crescentic            | 19               | 4             | 3    | 1           | 0                     | 0          | 0                     | 0      | 2         | 29  |
|                 | Endocapillary         | 3                | 27            | 1    | 1           | 1                     | 0          | 1                     | 3      | 0         | 37  |
|                 | FSGS                  | 4                | 3             | 25   | 7           | 3                     | 3          | 2                     | 4      | 3         | 54  |
|                 | Hypertrophy           | 0                | 0             | 1    | 29          | 1                     | 1          | 0                     | 1      | 0         | 33  |
| Fold5           | Membranoproliferative | 0                | 13            | 1    | 0           | 29                    | 2          | 1                     | 0      | 0         | 46  |
|                 | Membranous            | 0                | 0             | 1    | 2           | 0                     | 31         | 1                     | 0      | 0         | 35  |
|                 | Mesangioproliferative | 1                | 3             | 14   | 0           | 4                     | 4          | 15                    | 1      | 0         | 42  |
|                 | Normal                | 1                | 1             | 8    | 8           | 1                     | 9          | 5                     | 63     | 0         | 96  |
|                 | Sclerosed             | 0                | 0             | 1    | 0           | 0                     | 0          | 0                     | 0      | 44        | 45  |
|                 | Crescentic            | 19               | 4             | 3    | 1           | 0                     | 0          | 0                     | 0      | 2         | 29  |
|                 | Endocapillary         | 3                | 27            | 1    | 1           | 1                     | 0          | 1                     | 3      | 0         | 37  |
|                 | FSGS                  | 4                | 3             | 25   | 7           | 3                     | 3          | 2                     | 4      | 3         | 54  |

Supplementary table S2 (continued). Confusion matrices from cross validation of all classifiers (Spatially-guided).

[illegible]

Supplementary table S3. AUC scores from cross validation of all classifiers.

|       | Patterns              | Single-multiclass | Multiple-binary | Spatially-guided |
|-------|-----------------------|-------------------|-----------------|------------------|
|       |                       |                   |                 |                  |
| Fold1 | Crescentic            | 0.9758            | 0.9444          | 0.9747           |
|       | Endocapillary         | 0.9657            | 0.9253          | 0.9674           |
|       | FSGS                  | 0.8318            | 0.7606          | 0.8712           |
|       | Hypertrophy           | 0.9729            | 0.9671          | 0.9803           |
|       | Membranoproliferative | 0.9631            | 0.9464          | 0.9537           |
|       | Membranous            | 0.975             | 0.9543          | 0.9672           |
|       | Mesangioproliferative | 0.9197            | 0.8889          | 0.9092           |
|       | Normal                | 0.9542            | 0.9407          | 0.9688           |
|       | Sclerosed             | 0.9947            | 0.9909          | 0.9949           |
| Fold2 | Crescentic            | 0.9709            | 0.9441          | 0.9688           |
|       | Endocapillary         | 0.9581            | 0.9177          | 0.969            |
|       | FSGS                  | 0.8615            | 0.7685          | 0.8722           |
|       | Hypertrophy           | 0.9637            | 0.9708          | 0.9852           |
|       | Membranoproliferative | 0.966             | 0.9506          | 0.9618           |
|       | Membranous            | 0.9652            | 0.9525          | 0.9698           |
|       | Mesangioproliferative | 0.9324            | 0.9018          | 0.9242           |
|       | Normal                | 0.938             | 0.9302          | 0.9639           |
|       | Sclerosed             | 0.9947            | 0.9911          | 0.9949           |
| Fold3 | Crescentic            | 0.972             | 0.9396          | 0.9737           |
|       | Endocapillary         | 0.9584            | 0.9251          | 0.9742           |
|       | FSGS                  | 0.8382            | 0.7752          | 0.8517           |
|       | Hypertrophy           | 0.9662            | 0.9662          | 0.9818           |
|       | Membranoproliferative | 0.9653            | 0.9449          | 0.9596           |
|       | Membranous            | 0.9716            | 0.9508          | 0.9719           |
|       | Mesangioproliferative | 0.9122            | 0.8862          | 0.9226           |
|       | Normal                | 0.938             | 0.9348          | 0.9615           |
|       | Sclerosed             | 0.9947            | 0.9916          | 0.9949           |
| Fold4 | Crescentic            | 0.9629            | 0.9333          | 0.9695           |
|       | Endocapillary         | 0.9671            | 0.9139          | 0.9731           |
|       | FSGS                  | 0.8466            | 0.7647          | 0.8862           |
|       | Hypertrophy           | 0.9711            | 0.9723          | 0.9812           |
|       | Membranoproliferative | 0.9719            | 0.9508          | 0.9537           |
|       | Membranous            | 0.9701            | 0.9537          | 0.9756           |
|       | Mesangioproliferative | 0.9263            | 0.8679          | 0.9162           |
|       | Normal                | 0.9392            | 0.9263          | 0.9639           |
|       | Sclerosed             | 0.9947            | 0.9907          | 0.9949           |
| Fold5 | Crescentic            | 0.9734            | 0.9131          | 0.9685           |
|       | Endocapillary         | 0.9728            | 0.9136          | 0.9712           |
|       | FSGS                  | 0.8238            | 0.7639          | 0.8346           |
|       | Hypertrophy           | 0.976             | 0.9717          | 0.9781           |
|       | Membranoproliferative | 0.9585            | 0.9466          | 0.9495           |
|       | Membranous            | 0.9693            | 0.9519          | 0.9747           |
|       | Mesangioproliferative | 0.9081            | 0.8862          | 0.9007           |
|       | Normal                | 0.947             | 0.9411          | 0.9617           |
|       | Sclerosed             | 0.9947            | 0.9907          | 0.9949           |

Supplementary table S4. IoU scores (segmental injury patterns only) from cross validation of all classifiers.

|       |                       | Single-multiclass | Multiple-binary | Spatially-guided |
|-------|-----------------------|-------------------|-----------------|------------------|
|       | Patterns              |                   |                 |                  |
| Fold1 | Crescentic            | 0.053             | 0.056           | 0.532            |
|       | Endocapillary         | 0.046             | 0.047           | 0.452            |
|       | FSGS                  | 0.043             | 0.024           | 0.327            |
|       | Mesangioproliferative | 0.040             | 0.035           | 0.233            |
| Fold2 | Crescentic            | 0.068             | 0.058           | 0.436            |
|       | Endocapillary         | 0.042             | 0.058           | 0.449            |
|       | FSGS                  | 0.044             | 0.053           | 0.264            |
|       | Mesangioproliferative | 0.036             | 0.068           | 0.265            |
| Fold3 | Crescentic            | 0.070             | 0.070           | 0.144            |
|       | Endocapillary         | 0.056             | 0.052           | 0.157            |
|       | FSGS                  | 0.046             | 0.037           | 0.092            |
|       | Mesangioproliferative | 0.045             | 0.032           | 0.075            |
| Fold4 | Crescentic            | 0.071             | 0.054           | 0.329            |
|       | Endocapillary         | 0.050             | 0.060           | 0.338            |
|       | FSGS                  | 0.037             | 0.026           | 0.232            |
|       | Mesangioproliferative | 0.041             | 0.044           | 0.208            |
| Fold5 | Crescentic            | 0.045             | 0.061           | 0.579            |
|       | Endocapillary         | 0.058             | 0.043           | 0.501            |
|       | FSGS                  | 0.043             | 0.031           | 0.401            |
|       | Mesangioproliferative | 0.041             | 0.063           | 0.393            |
