# Supplementary material
Source: MDPI journal article supplement (https://www.mdpi.com/2313-433X/9/10/220)
Supplement: s1 [file s1]

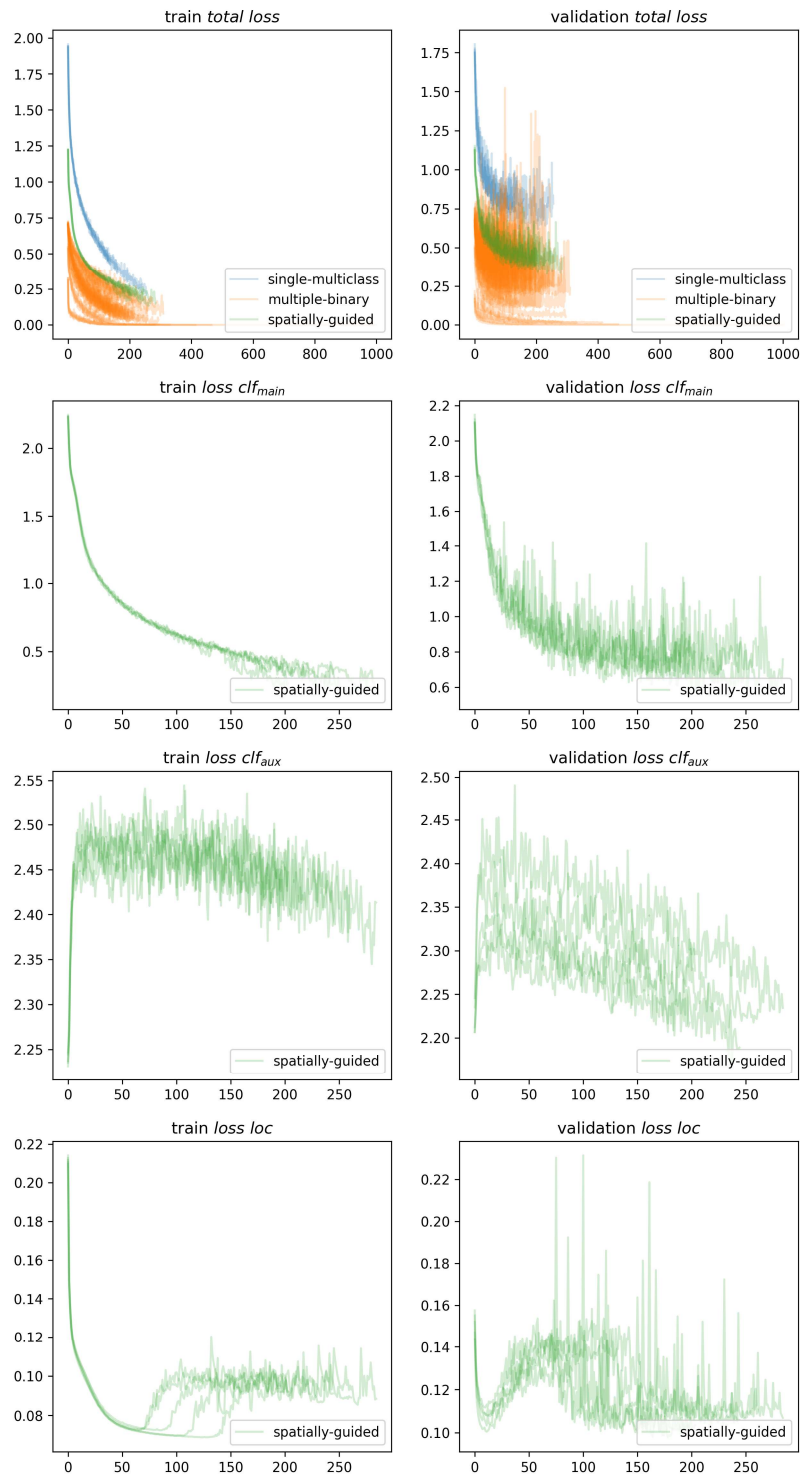

Supplementary Figure S1. Model training metrics (loss) from cross validation of all classifiers.

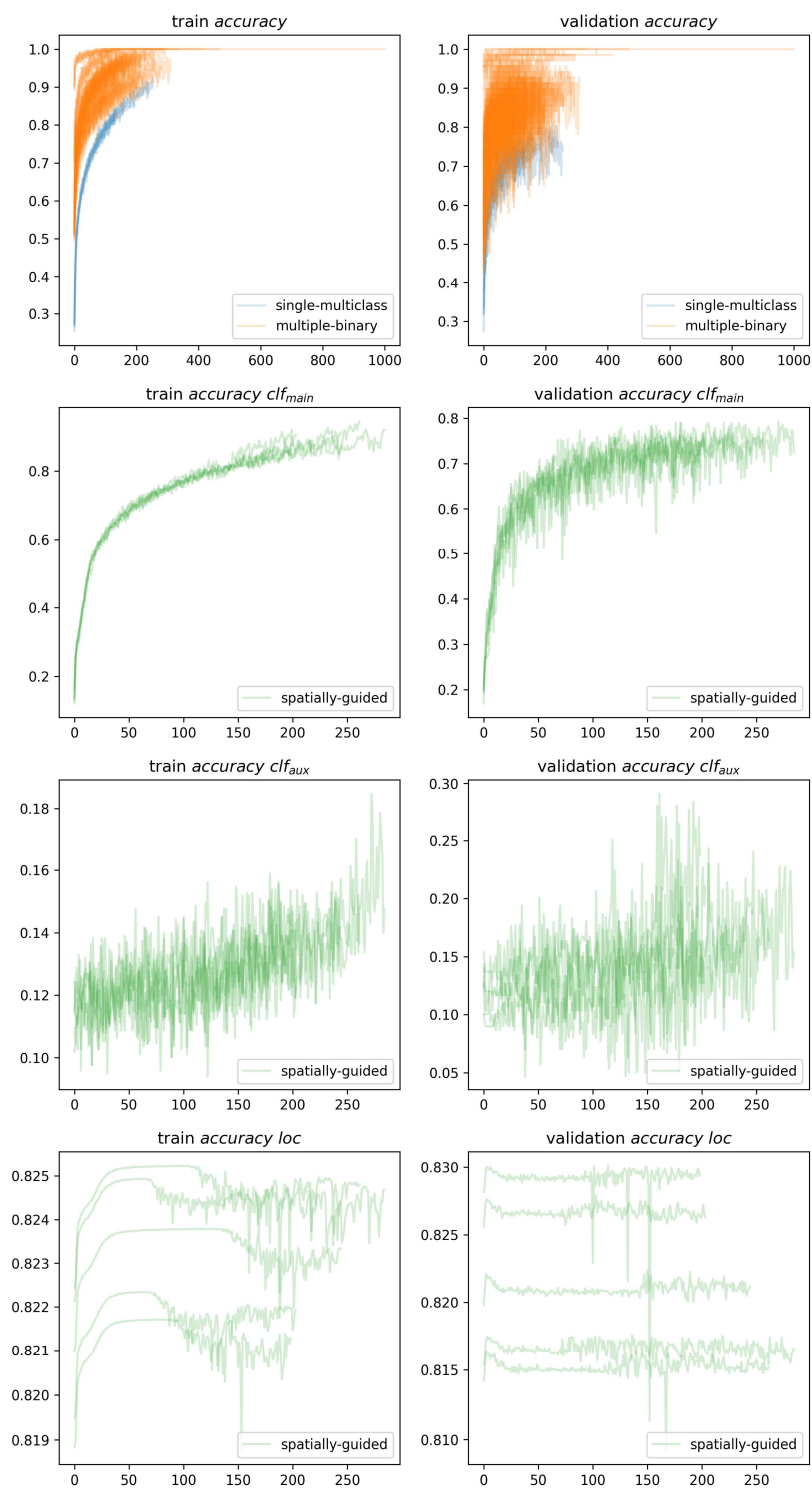

Supplementary Figure S1 (continued). Model training metrics (accuracy) from cross validation of all classifiers.
