# Supplementary material
Source: MDPI journal article supplement (https://www.mdpi.com/2313-433X/9/10/220)
Supplement: s1 [file s1]

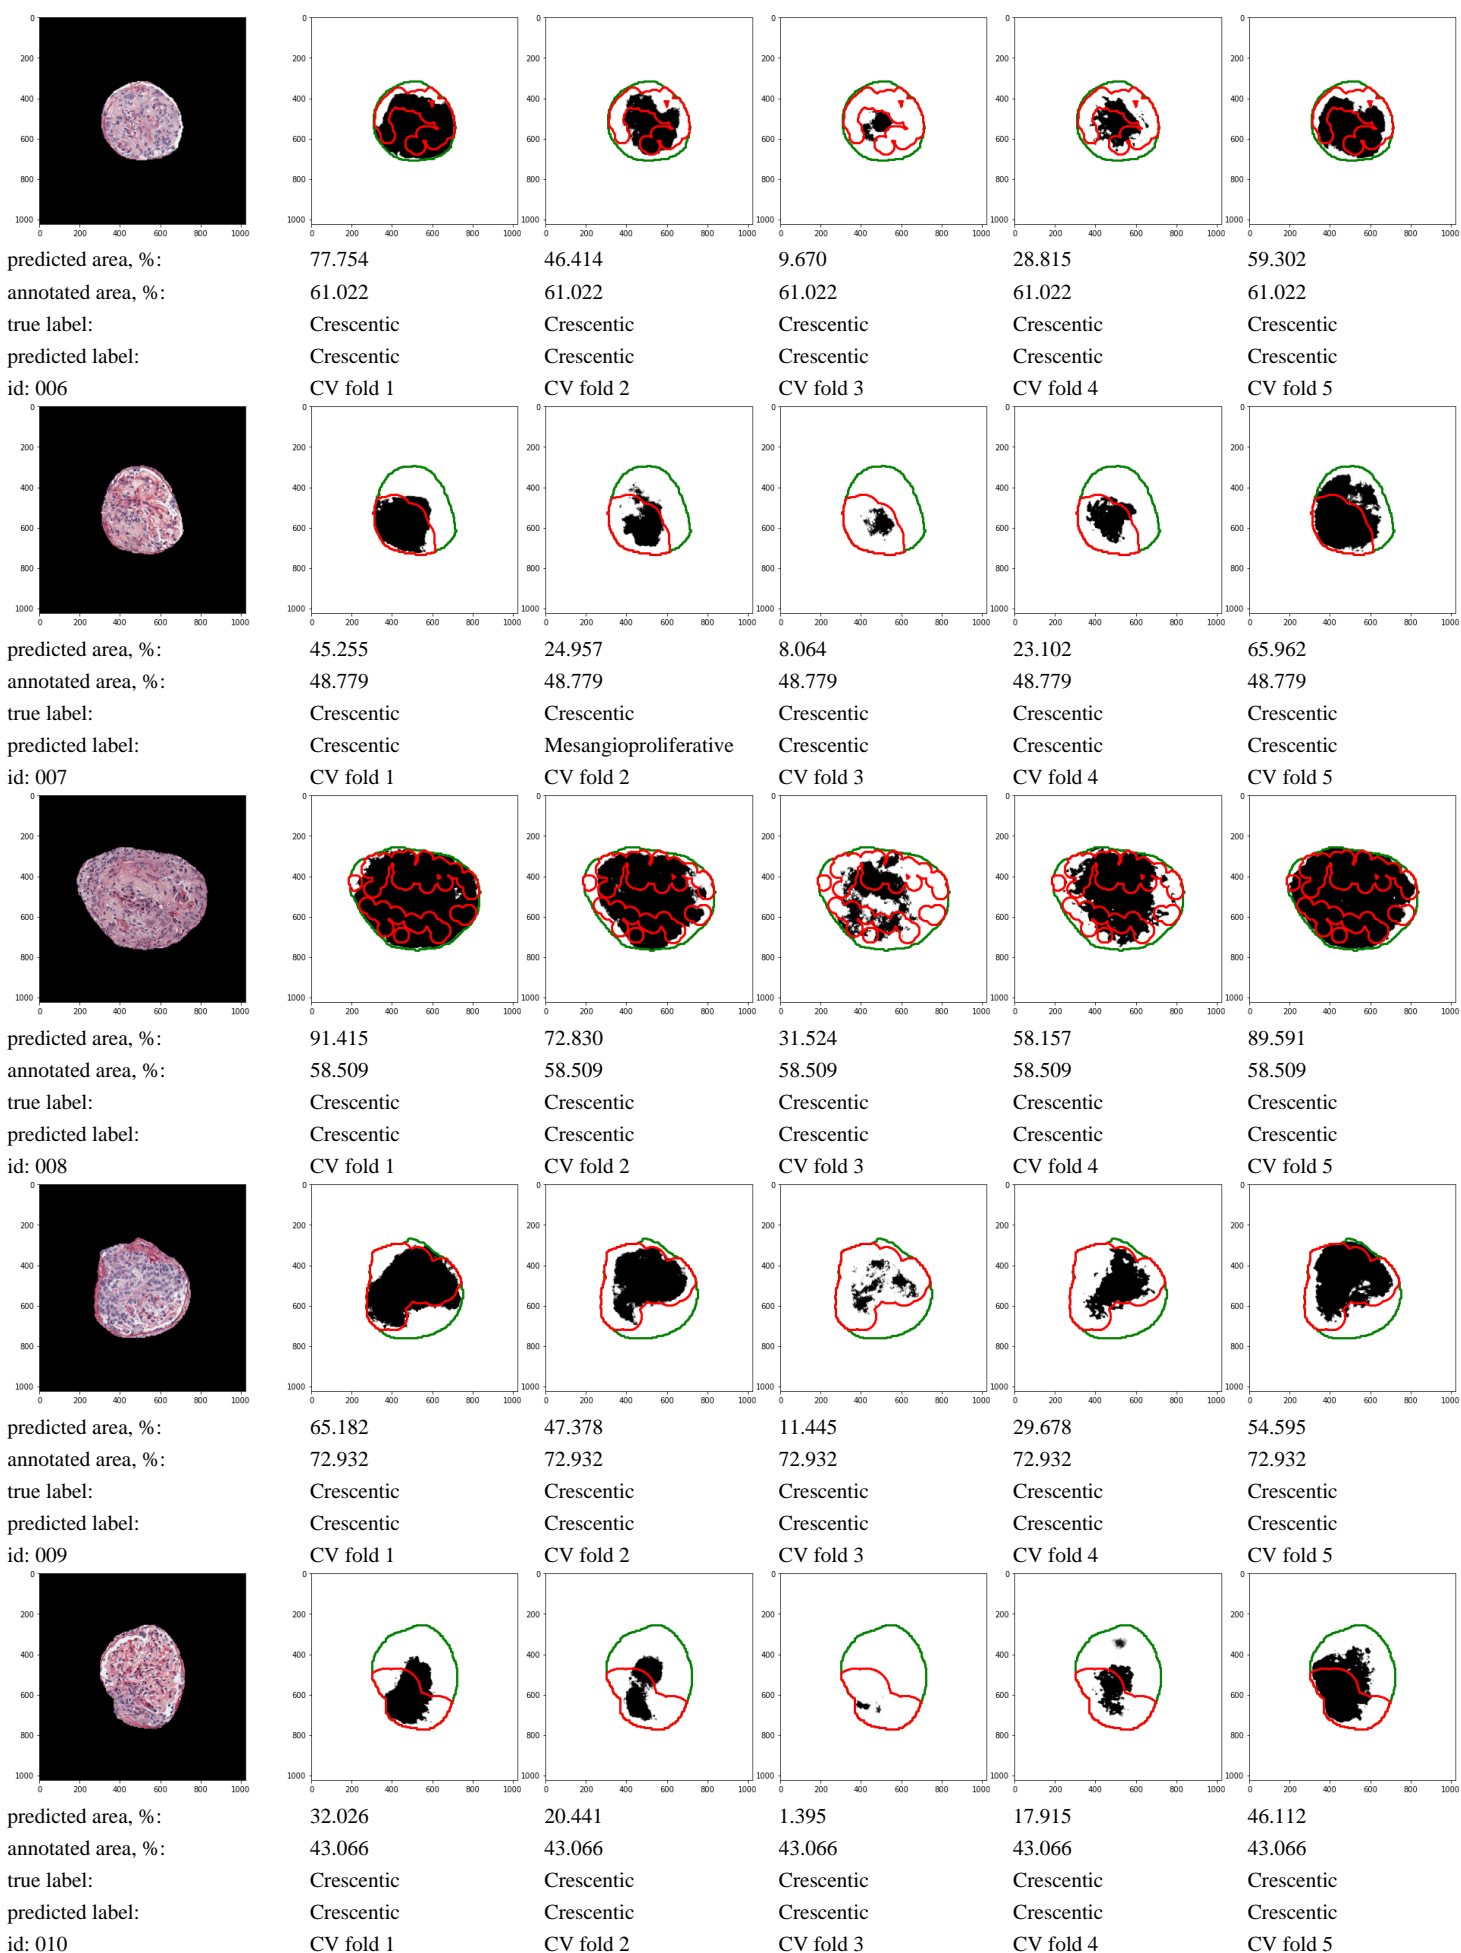

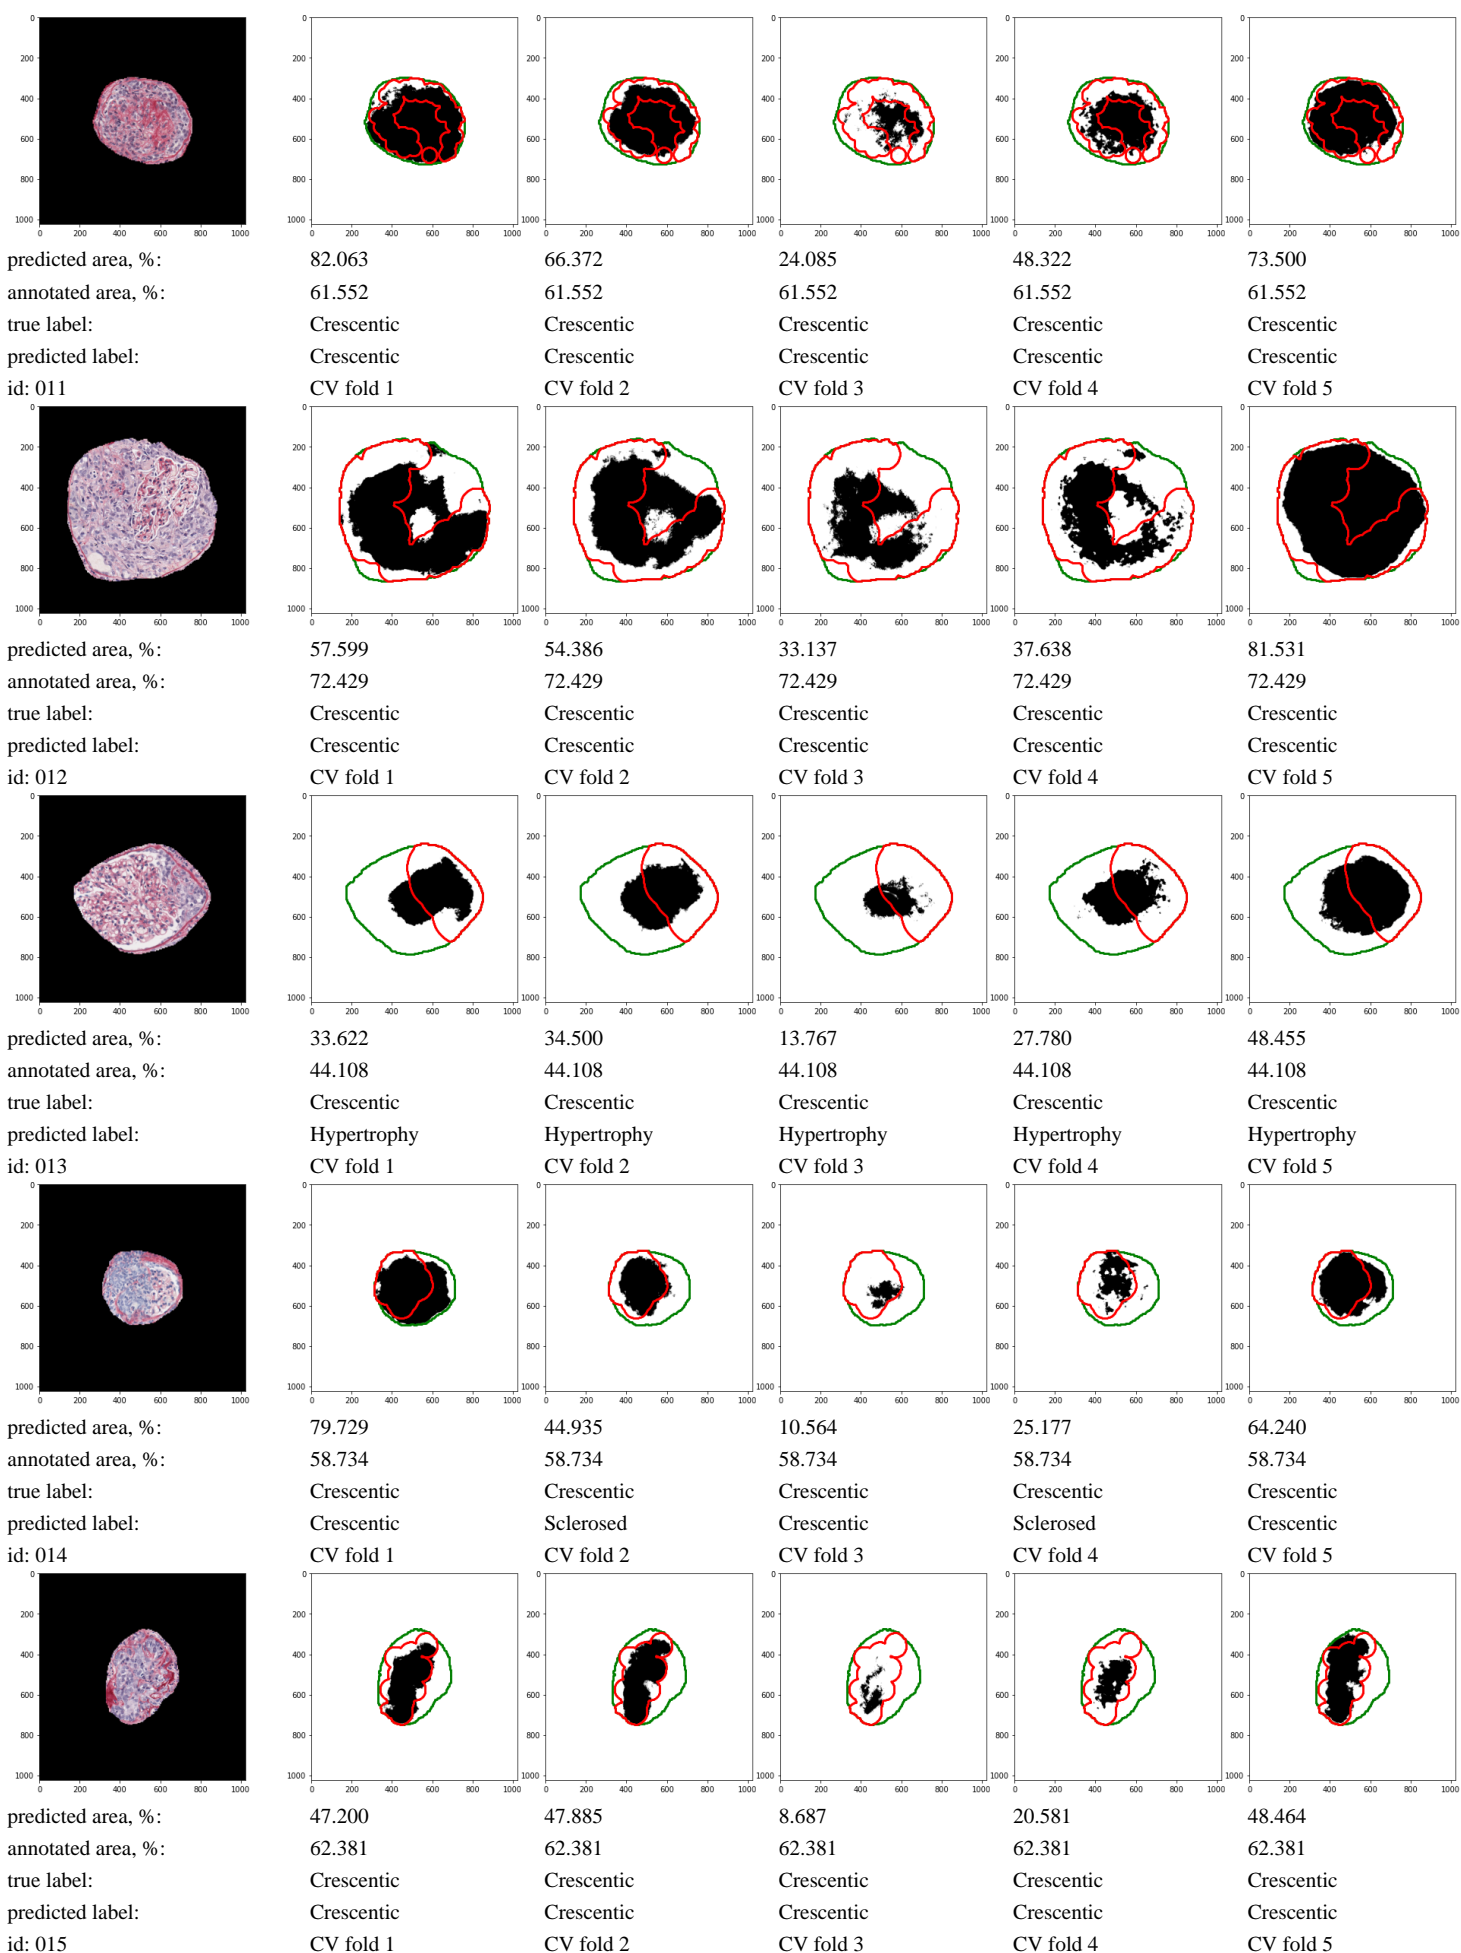

Supplementary Figure S2 (continued). Comparison of pattern quantification results per glomerular basis.

**Red contour:** annotated area @ 0.5 threshold    **Green contour:** total area    **Black fill:** predicted area @ 0.5 threshold

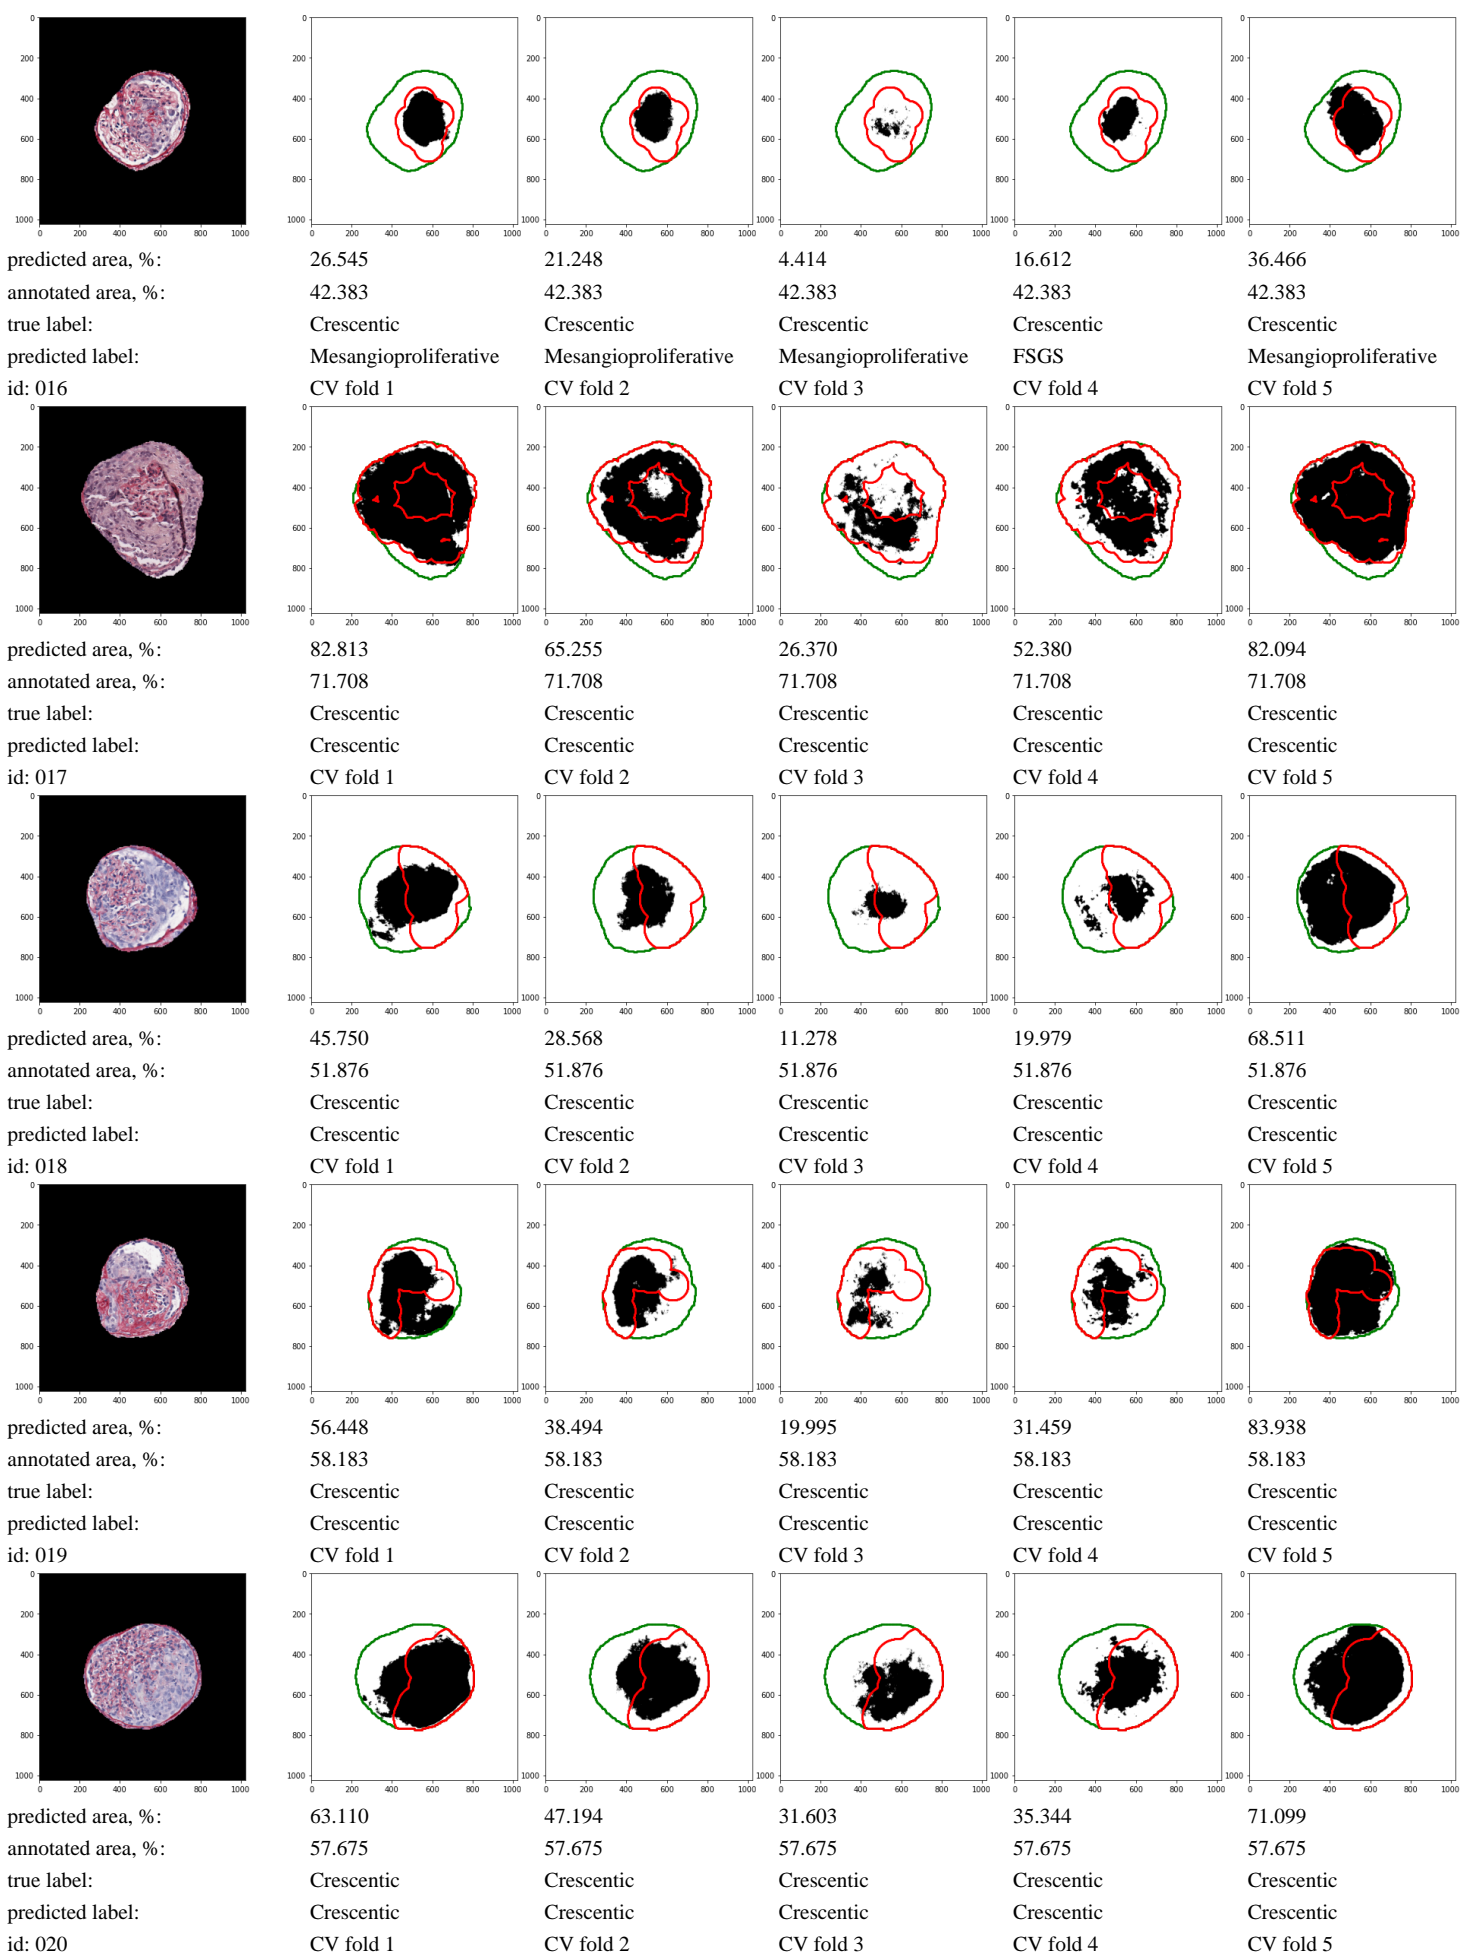



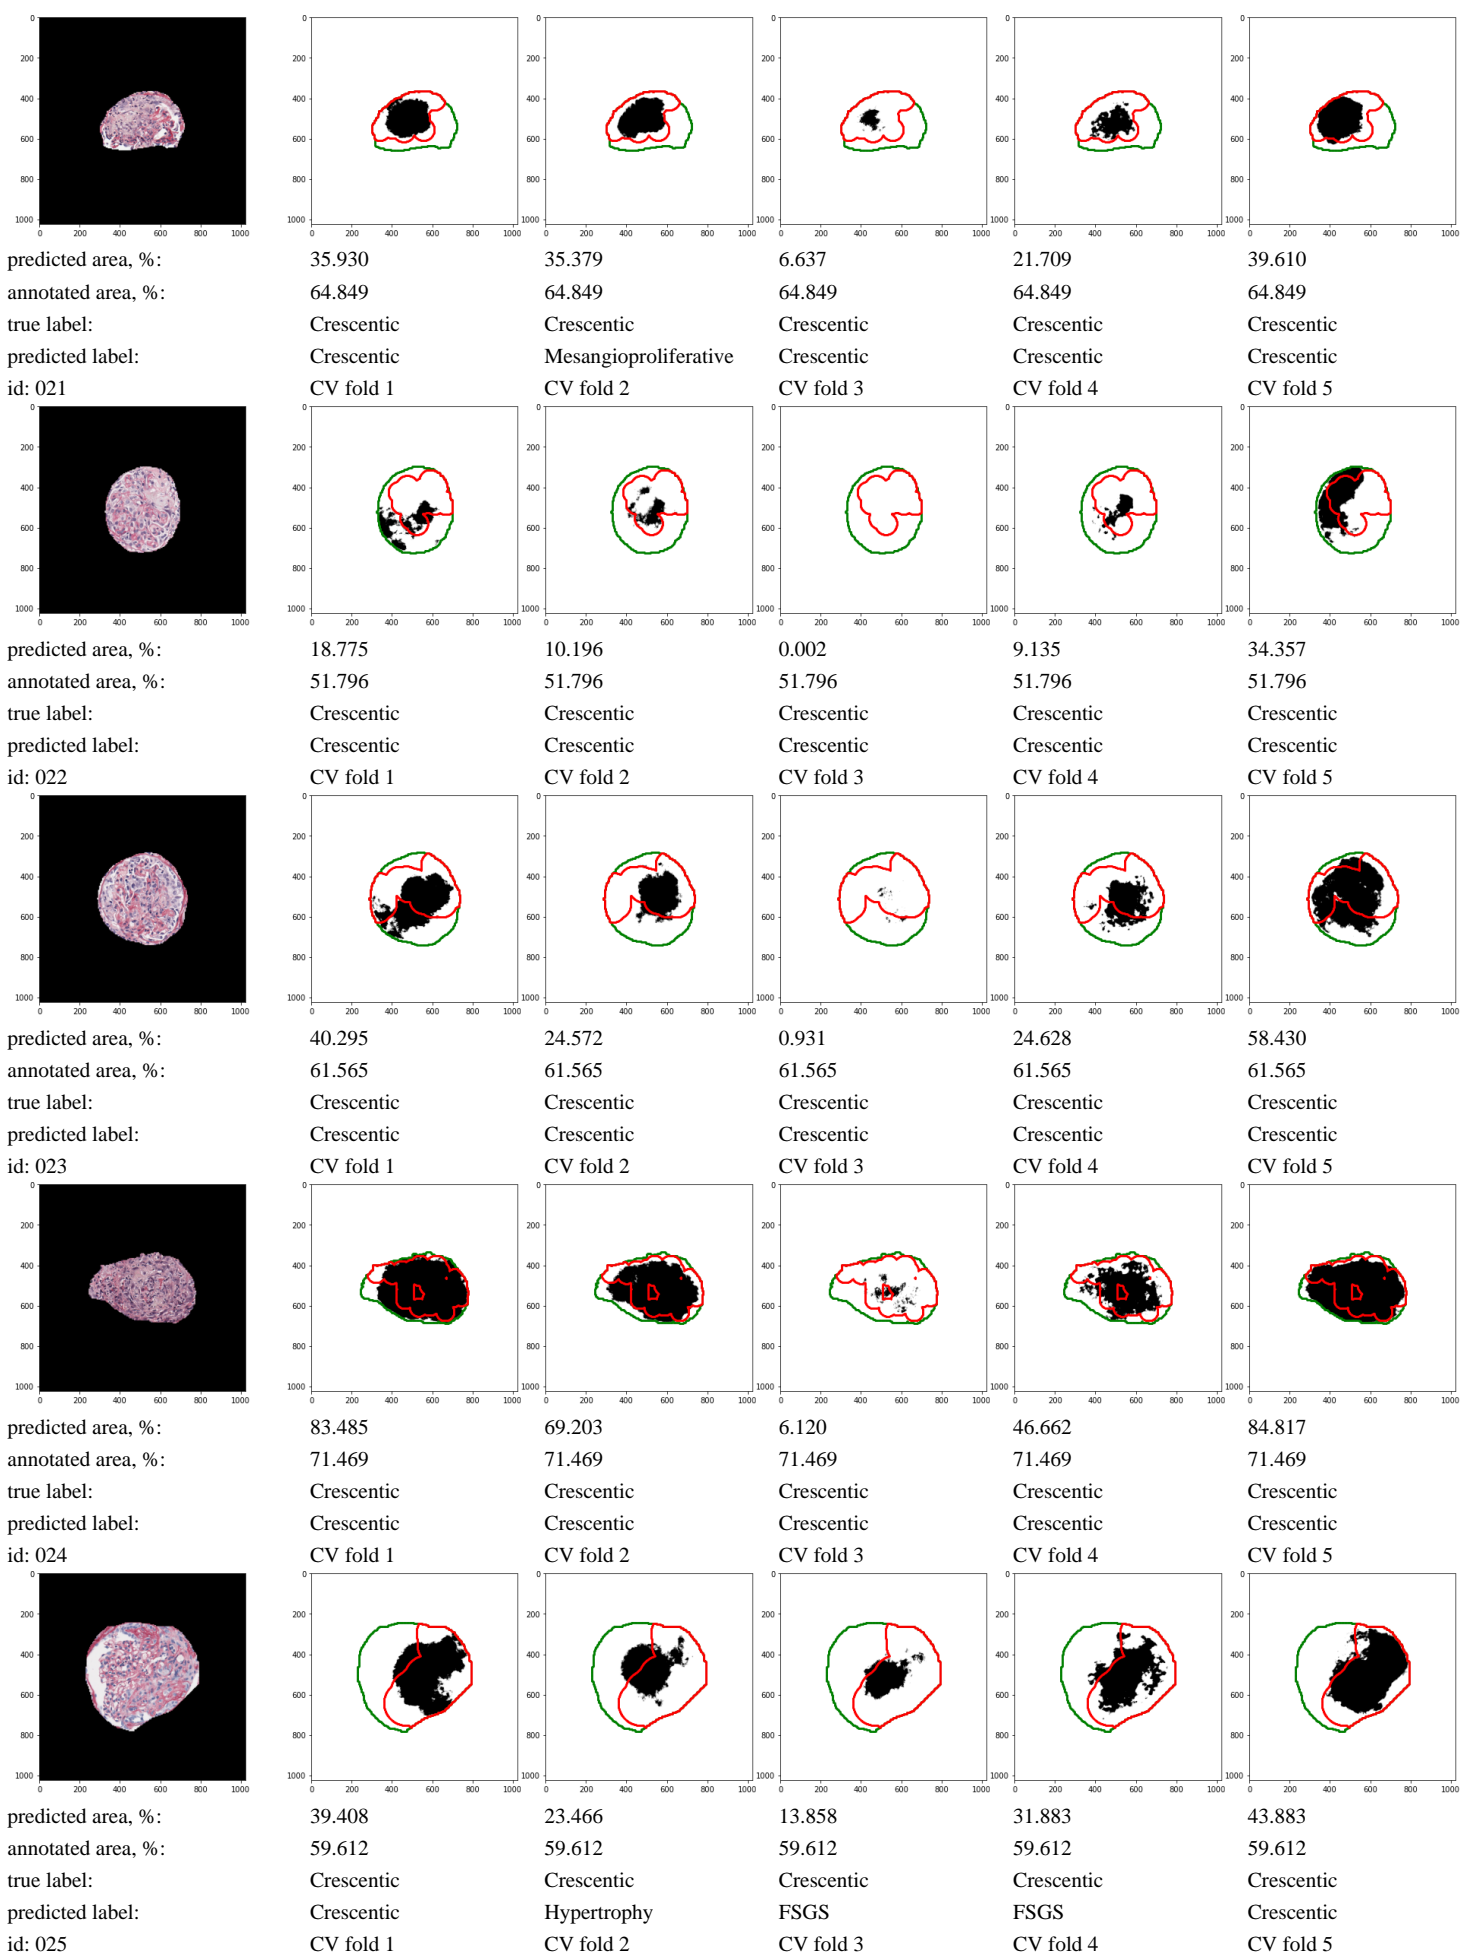

Supplementary Figure S2 (continued). Comparison of pattern quantification results per glomerular basis.

**Red contour:** annotated area @ 0.5 threshold    **Green contour:** total area    **Black fill:** predicted area @ 0.5 threshold

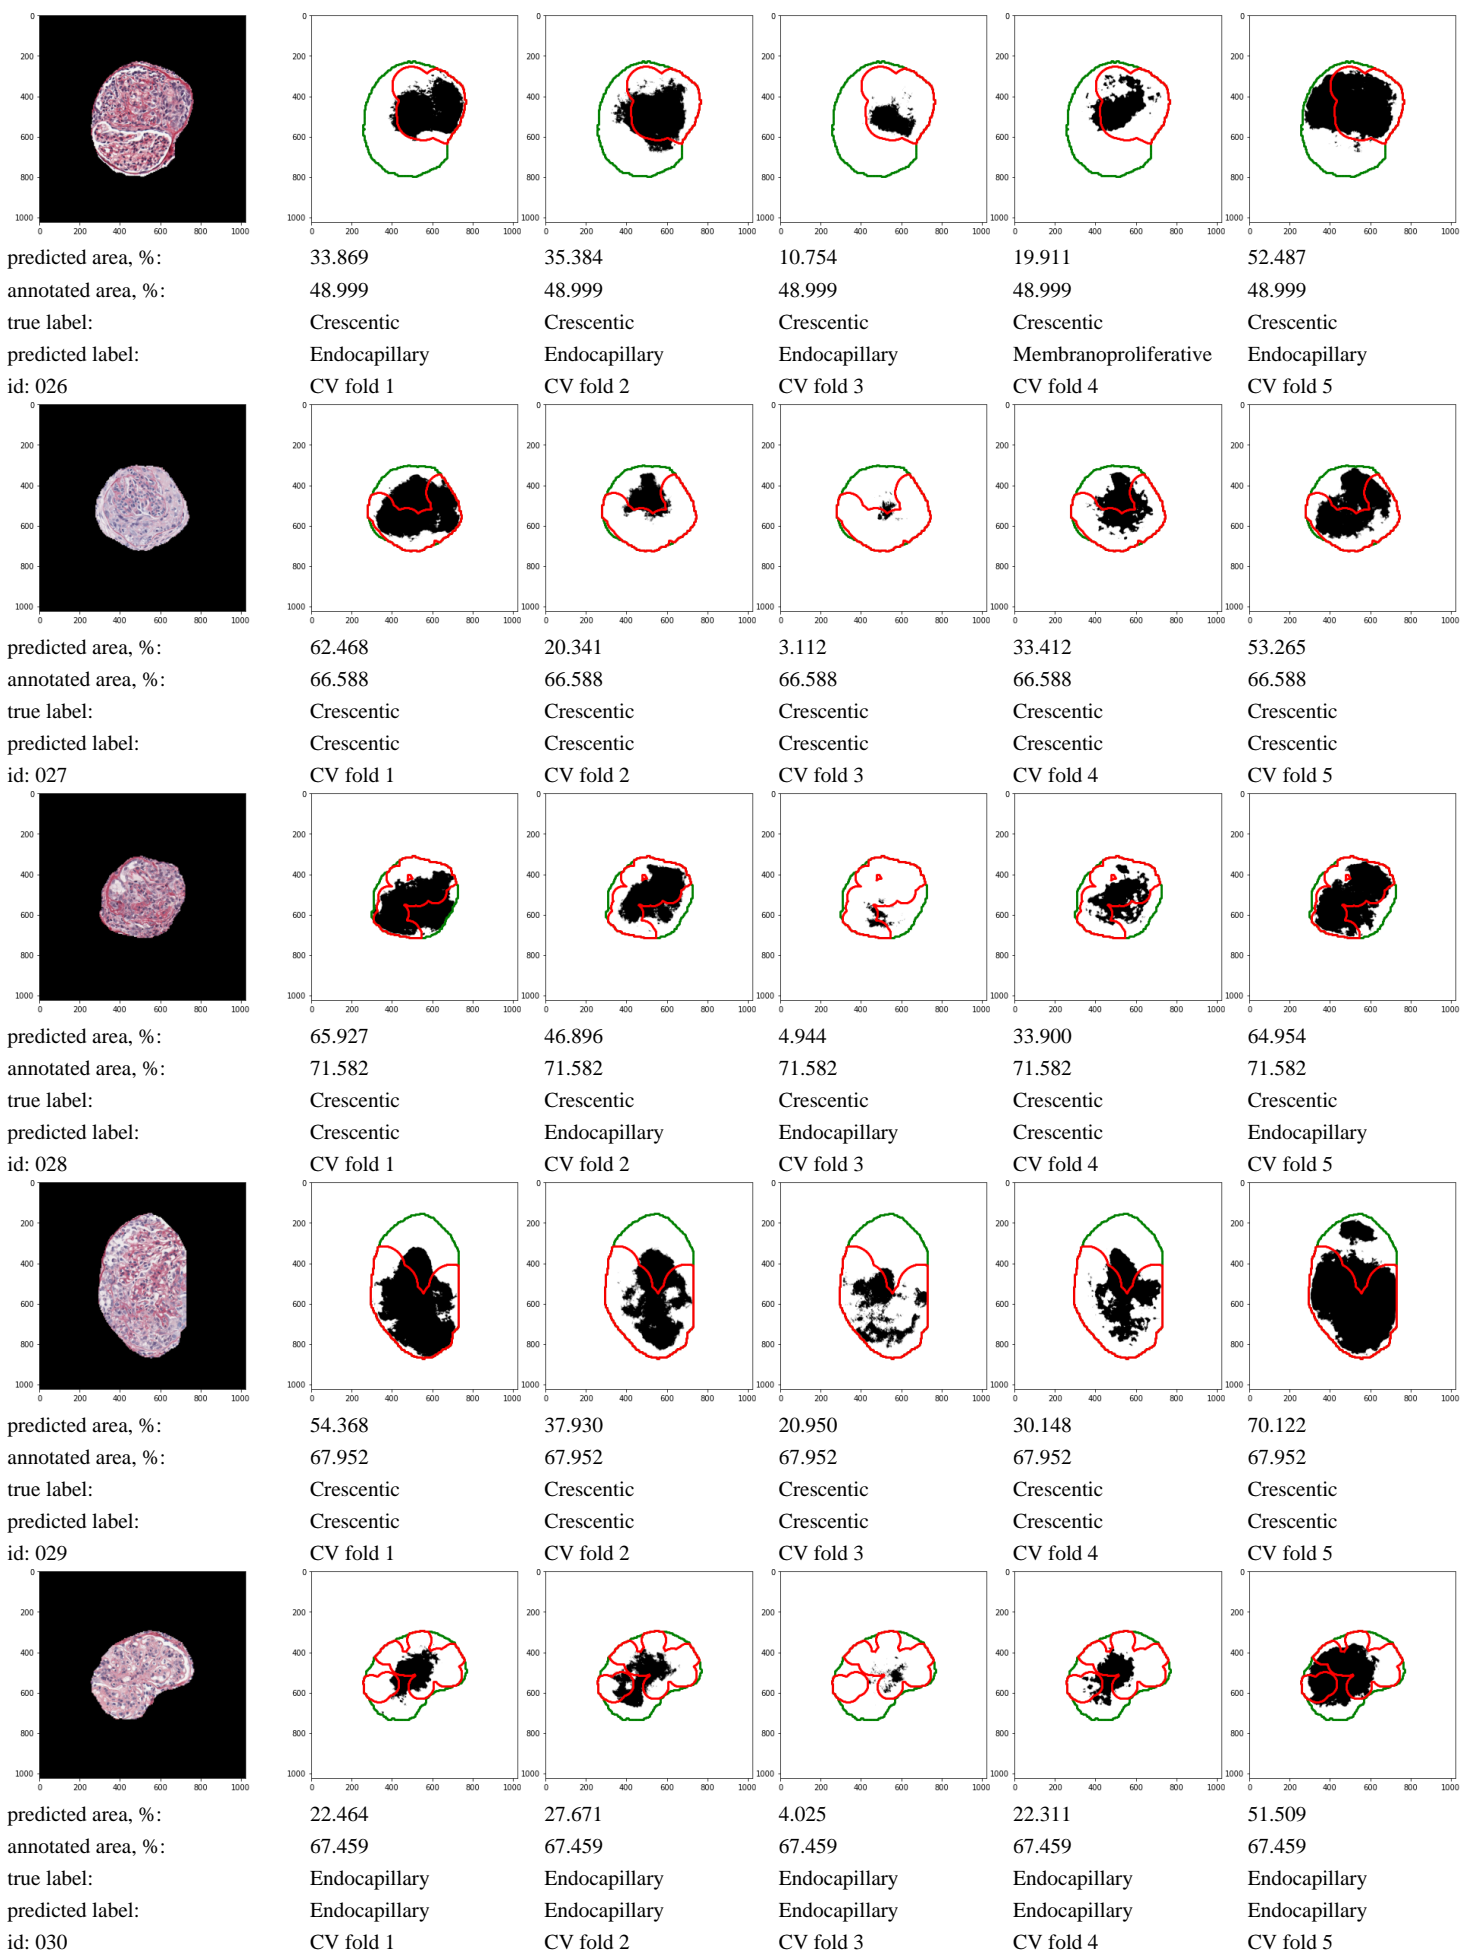

Supplementary Figure S2 (continued). Comparison of pattern quantification results per glomerular basis.

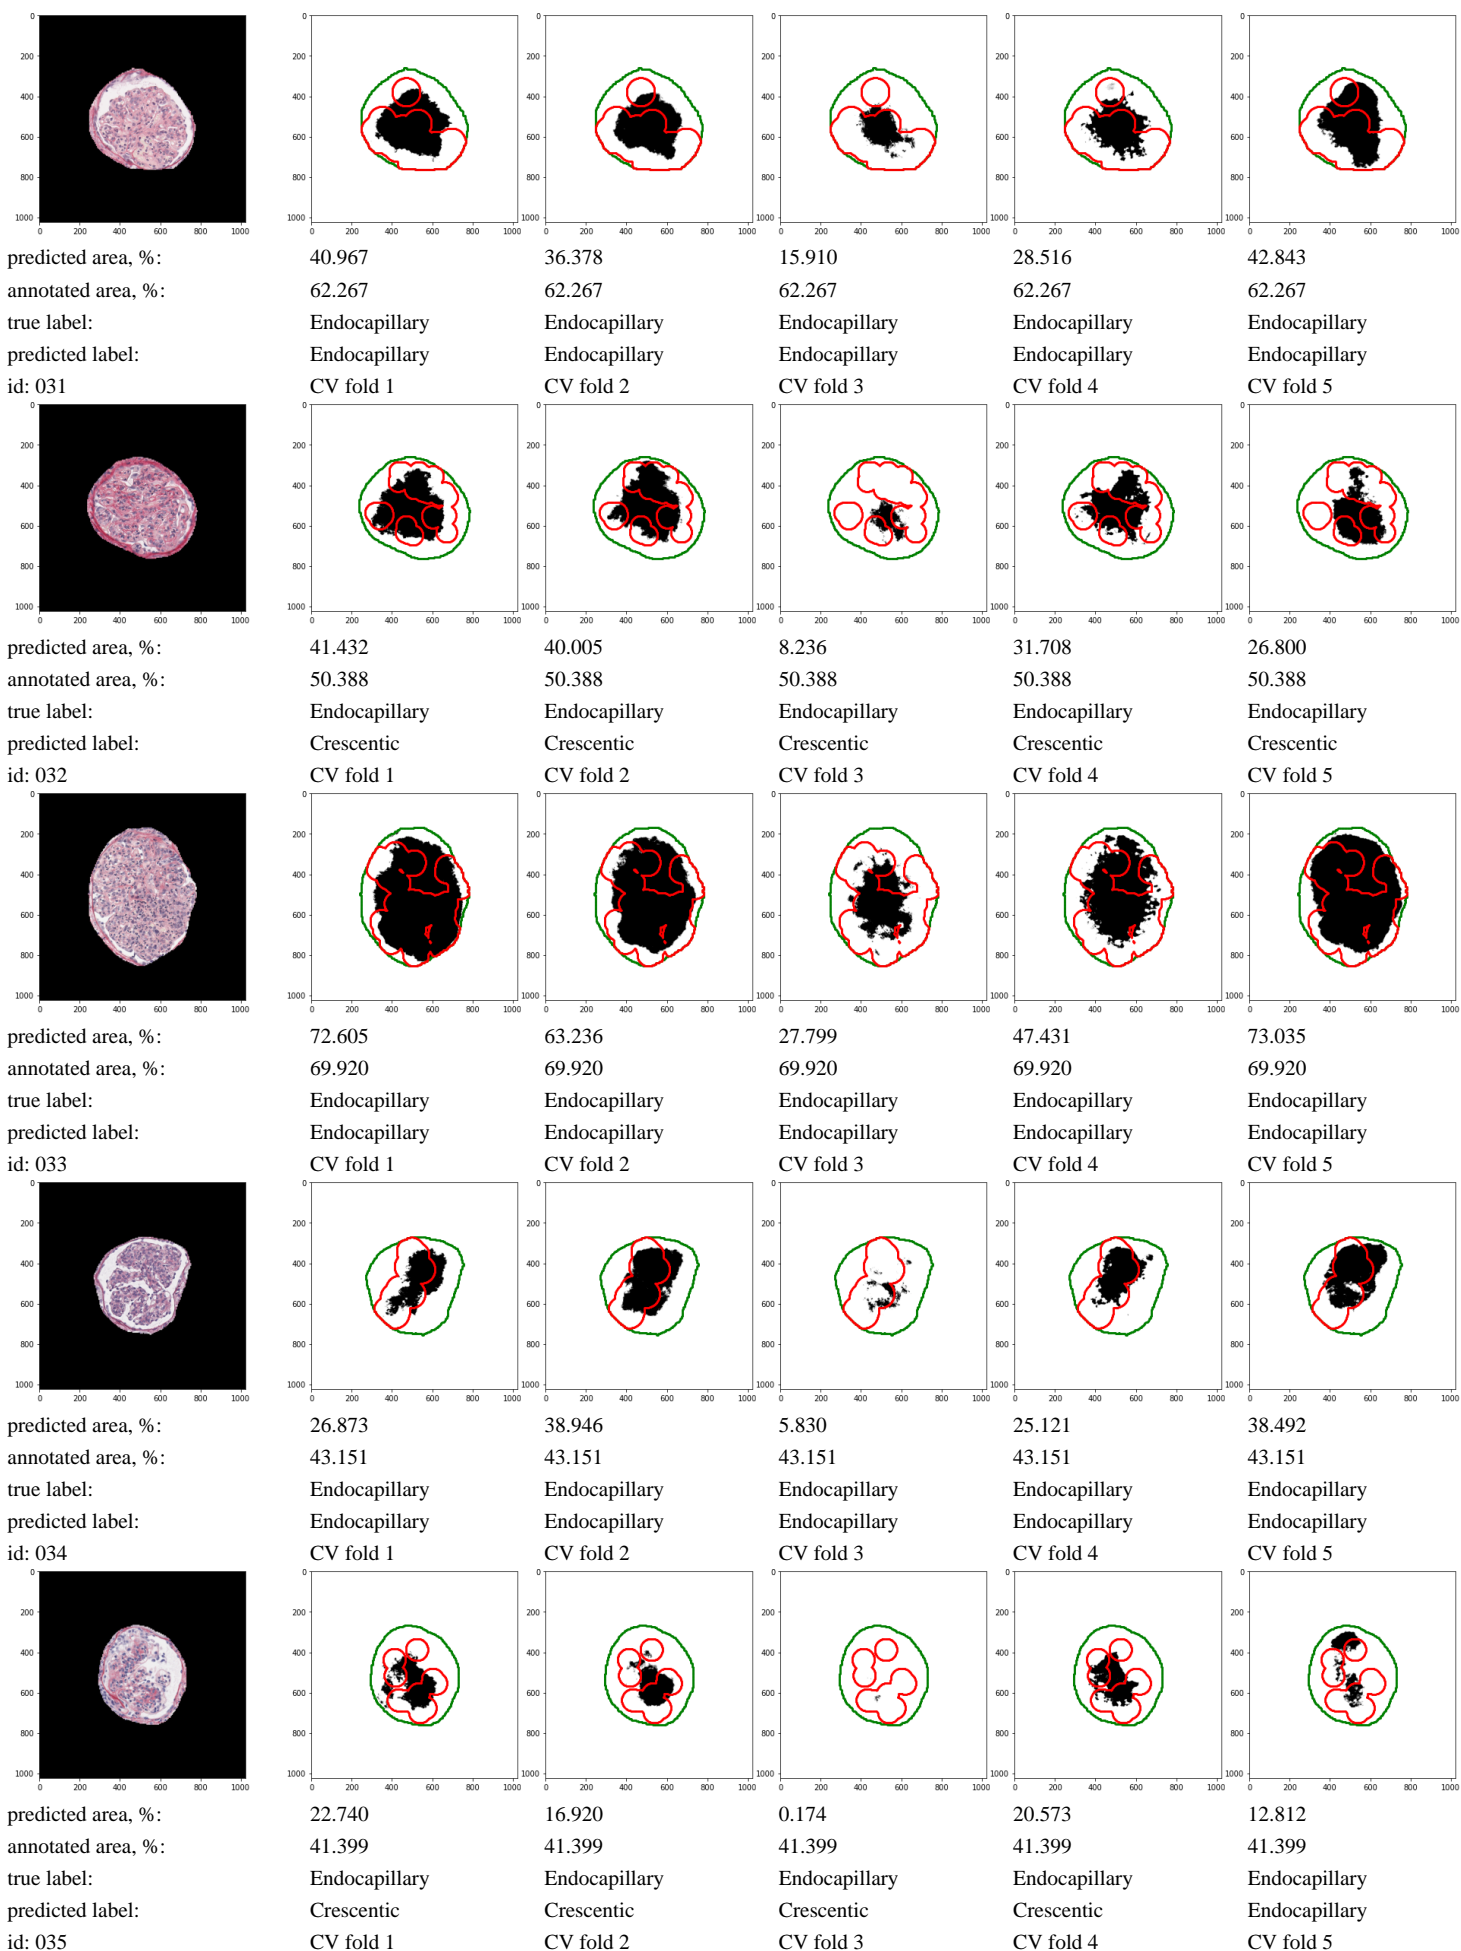

Supplementary Figure S2 (continued). Comparison of pattern quantification results per glomerular basis.

**Red contour:** annotated area @ 0.5 threshold    **Green contour:** total area    **Black fill:** predicted area @ 0.5 threshold

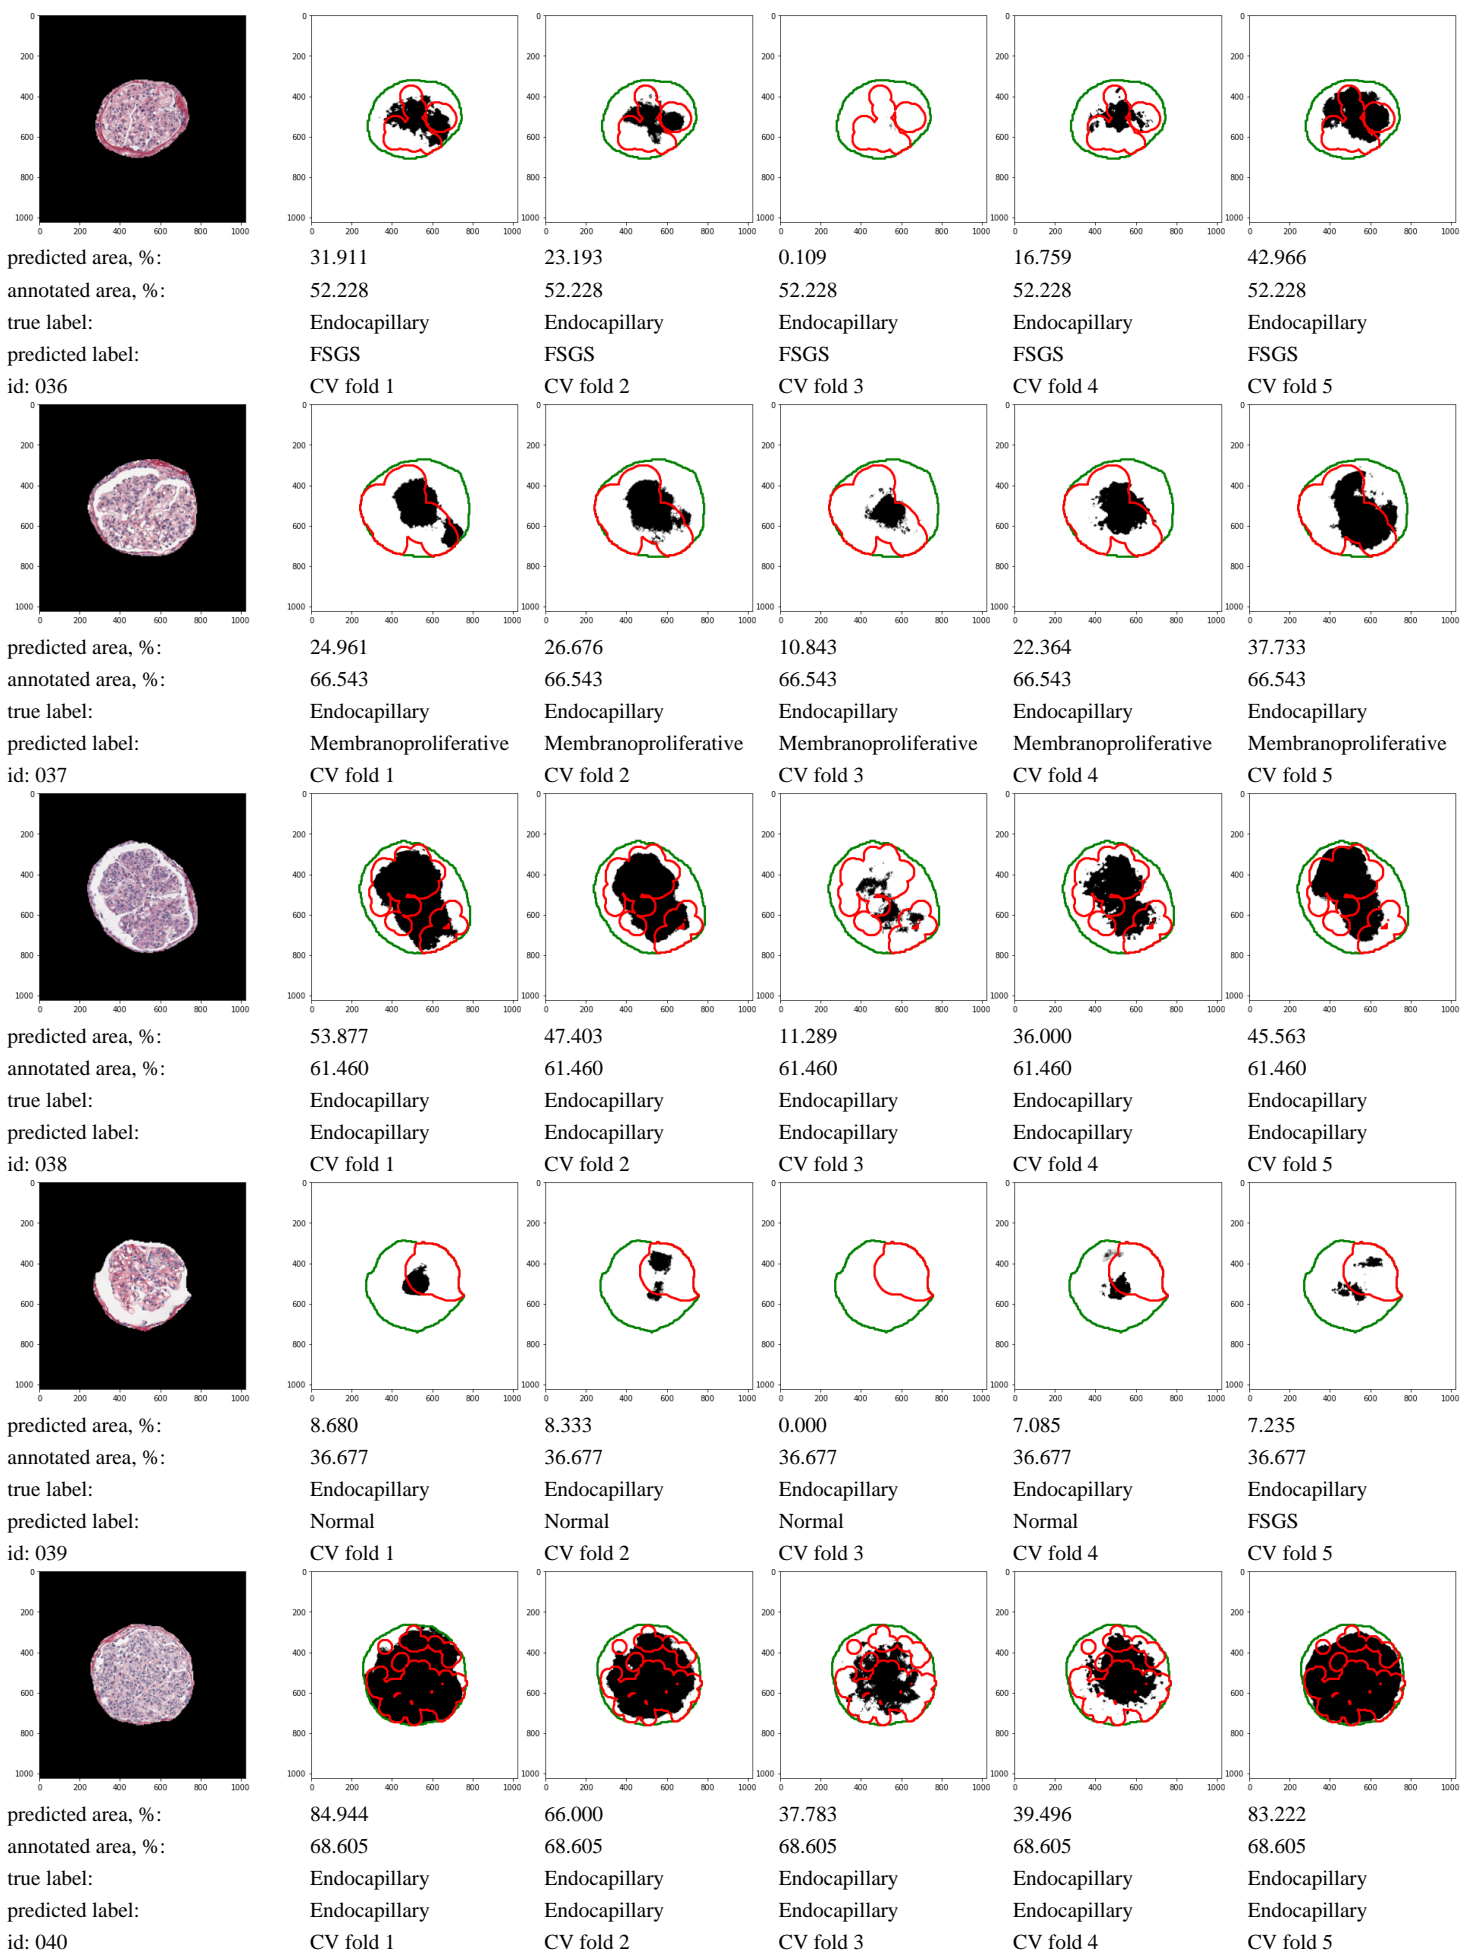

Supplementary Figure S2 (continued). Comparison of pattern quantification results per glomerular basis.

**Red contour:** annotated area @ 0.5 threshold    **Green contour:** total area    **Black fill:** predicted area @ 0.5 threshold

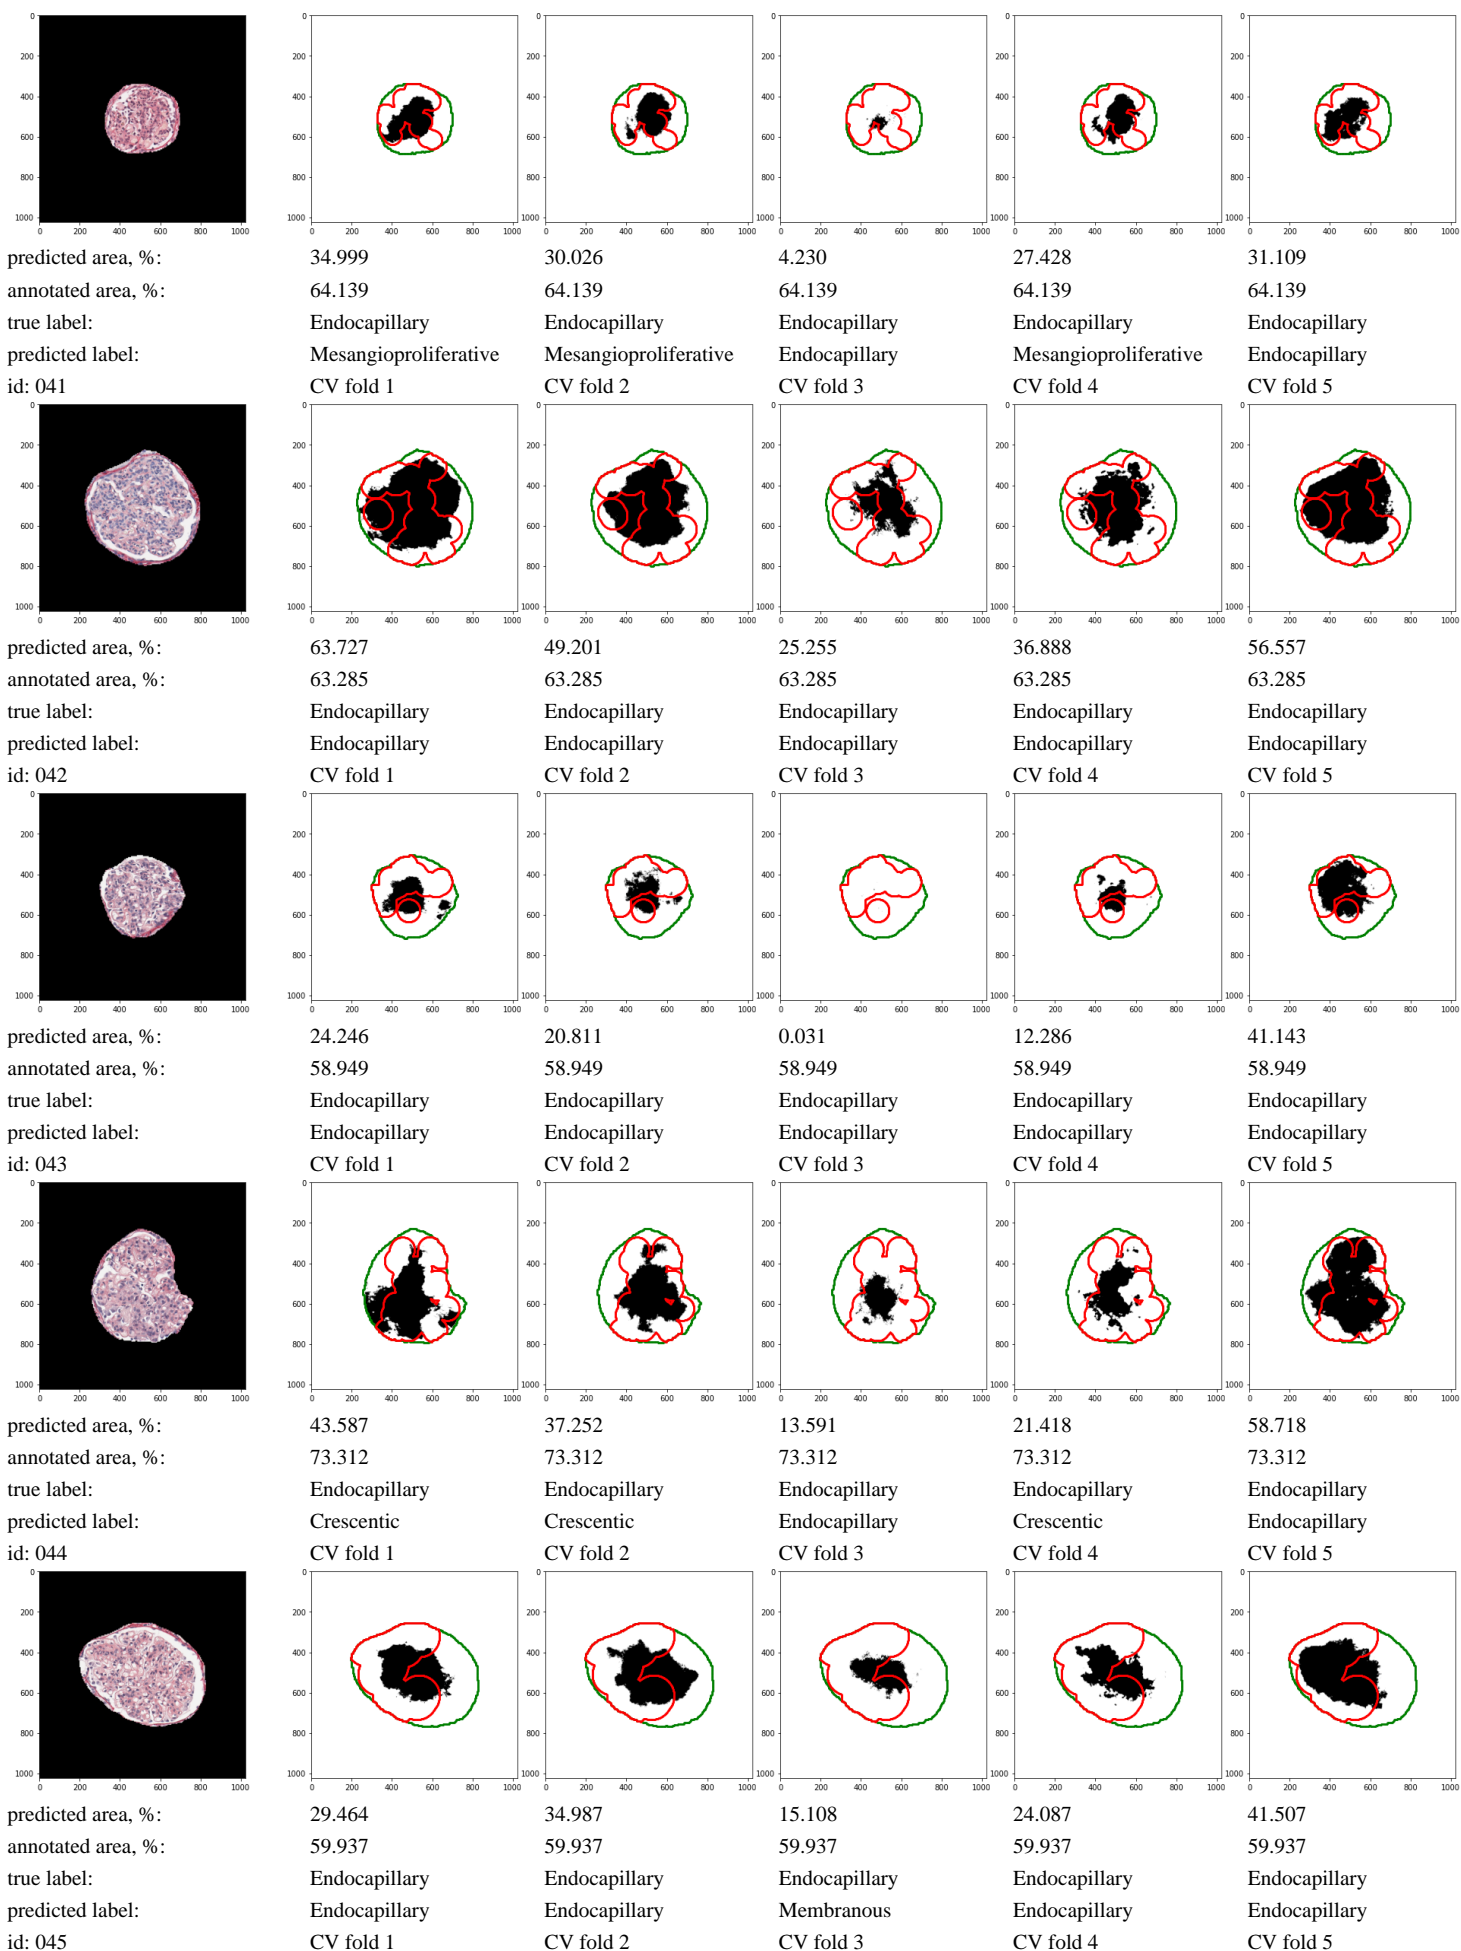

Supplementary Figure S2 (continued). Comparison of pattern quantification results per glomerular basis.

**Red contour:** annotated area @ 0.5 threshold    **Green contour:** total area    **Black fill:** predicted area @ 0.5 threshold

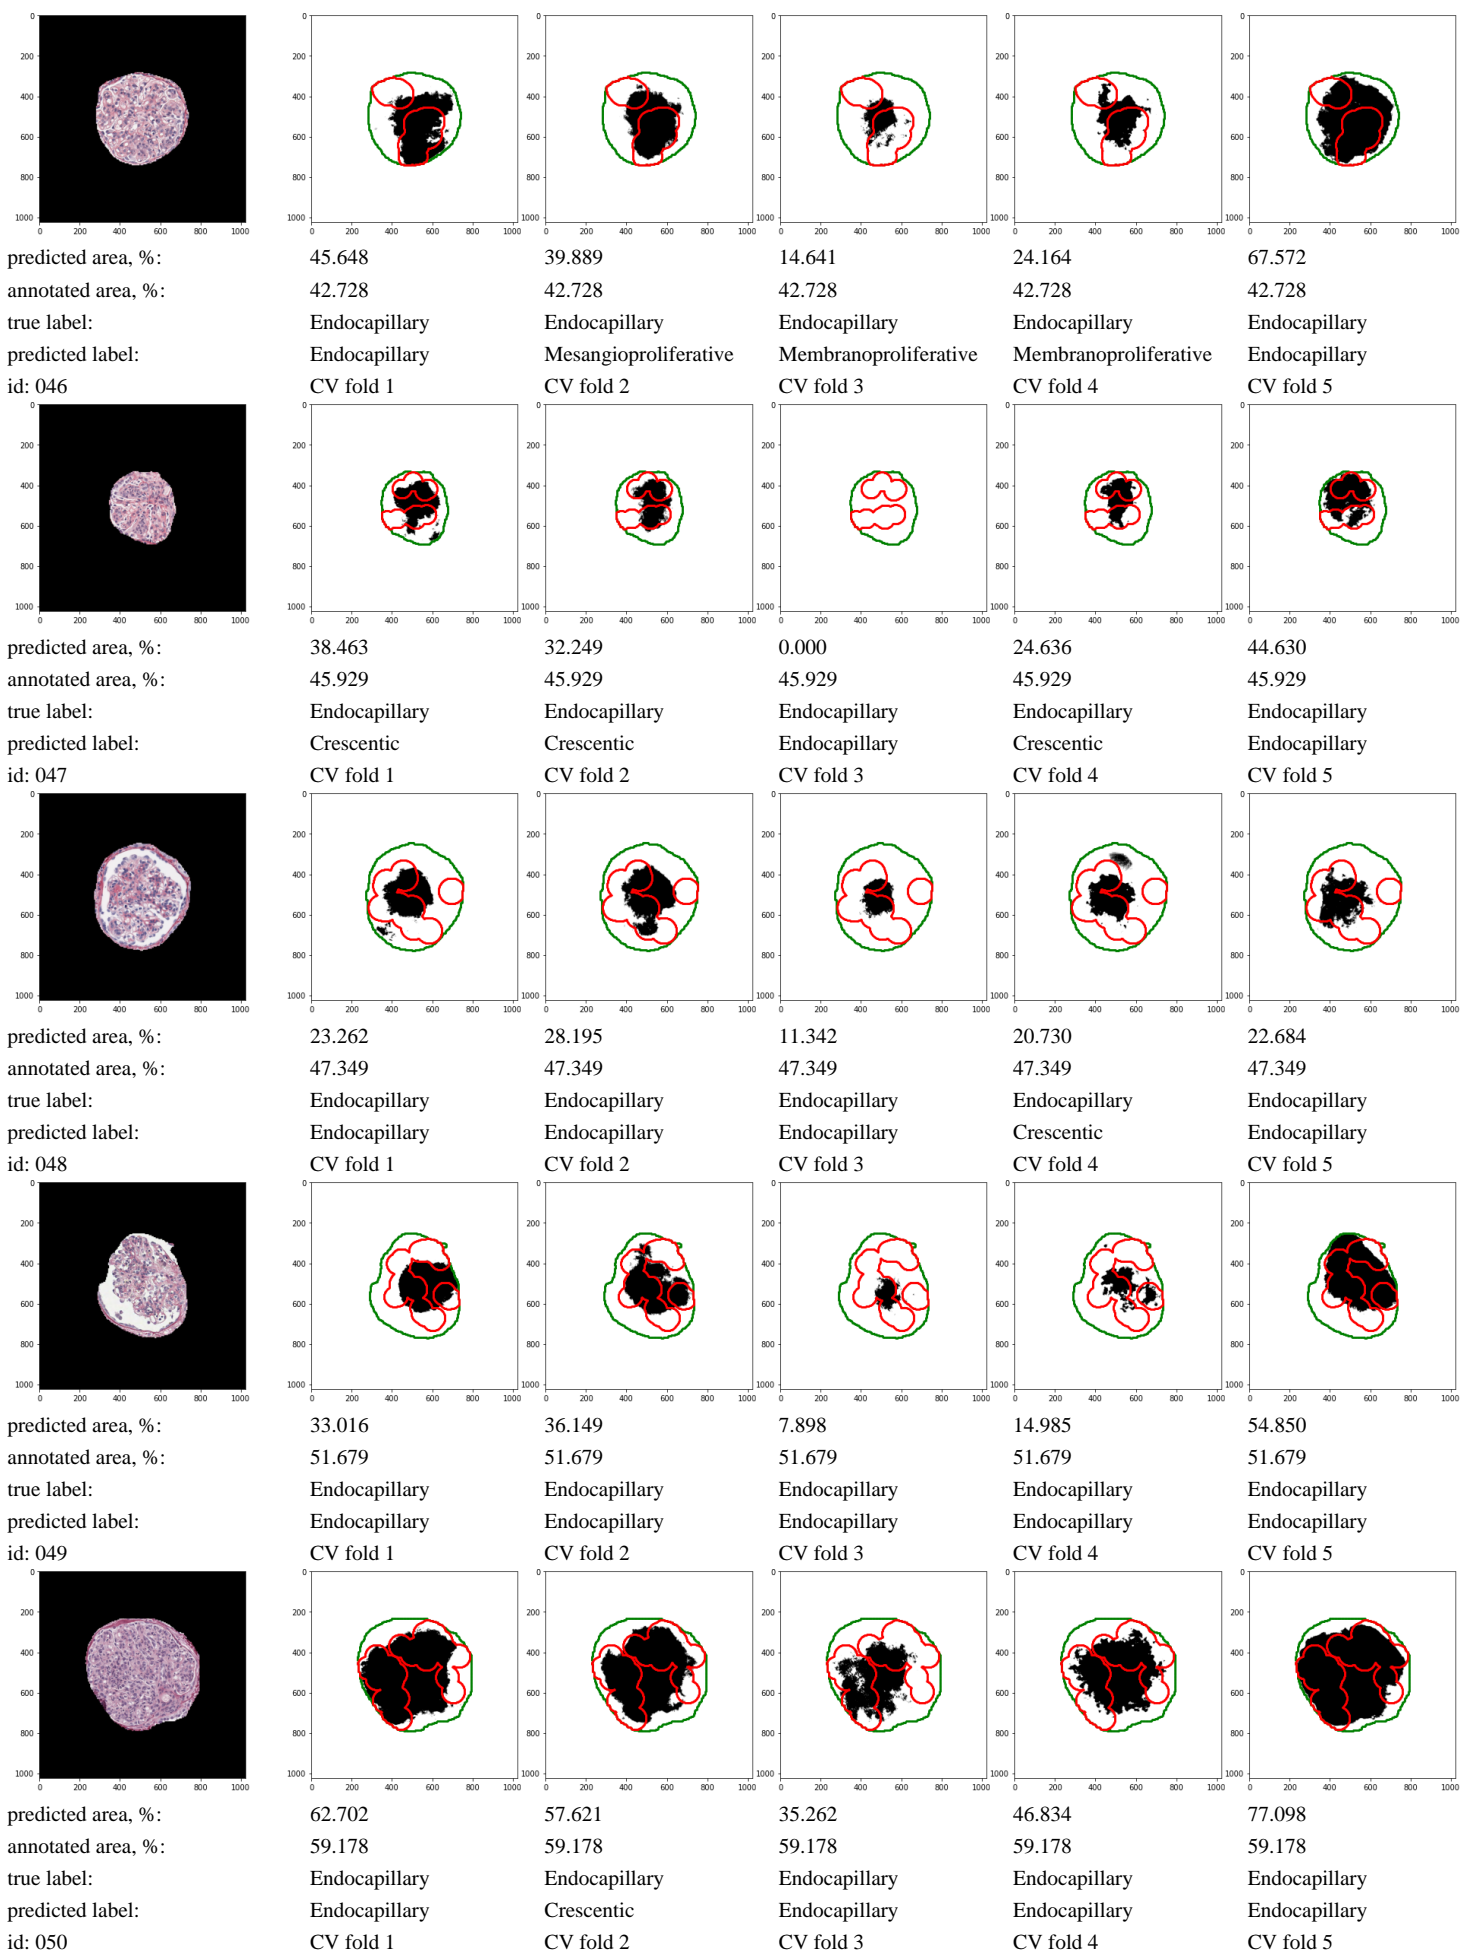

Supplementary Figure S2 (continued). Comparison of pattern quantification results per glomerular basis.

**Red contour:** annotated area @ 0.5 threshold    **Green contour:** total area    **Black fill:** predicted area @ 0.5 threshold



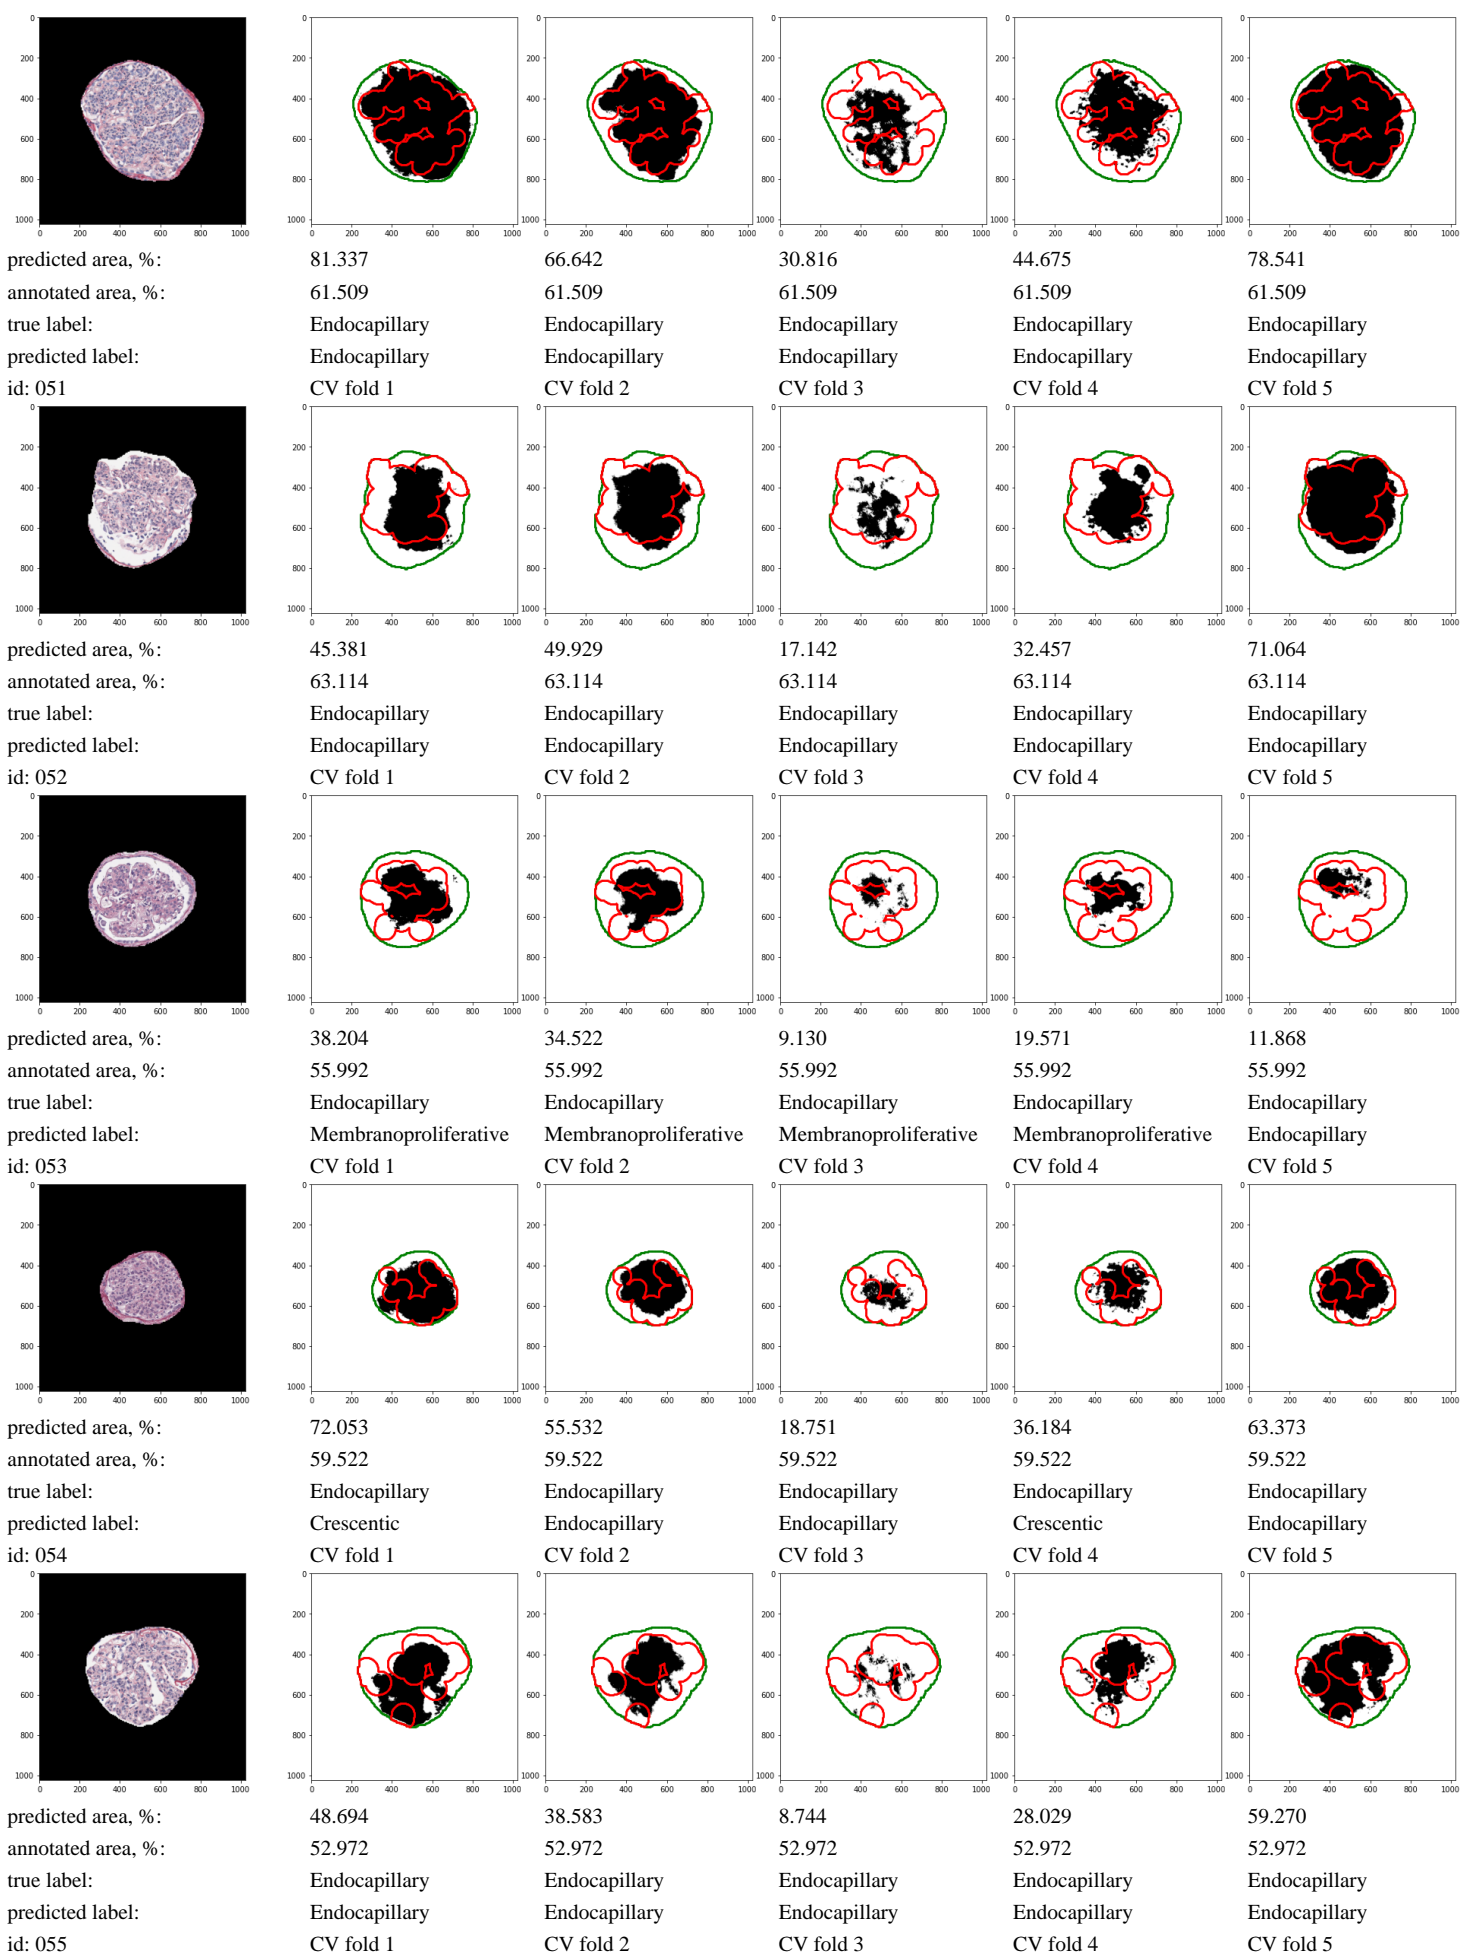

Supplementary Figure S2 (continued). Comparison of pattern quantification results per glomerular basis.

**Red contour:** annotated area @ 0.5 threshold    **Green contour:** total area    **Black fill:** predicted area @ 0.5 threshold

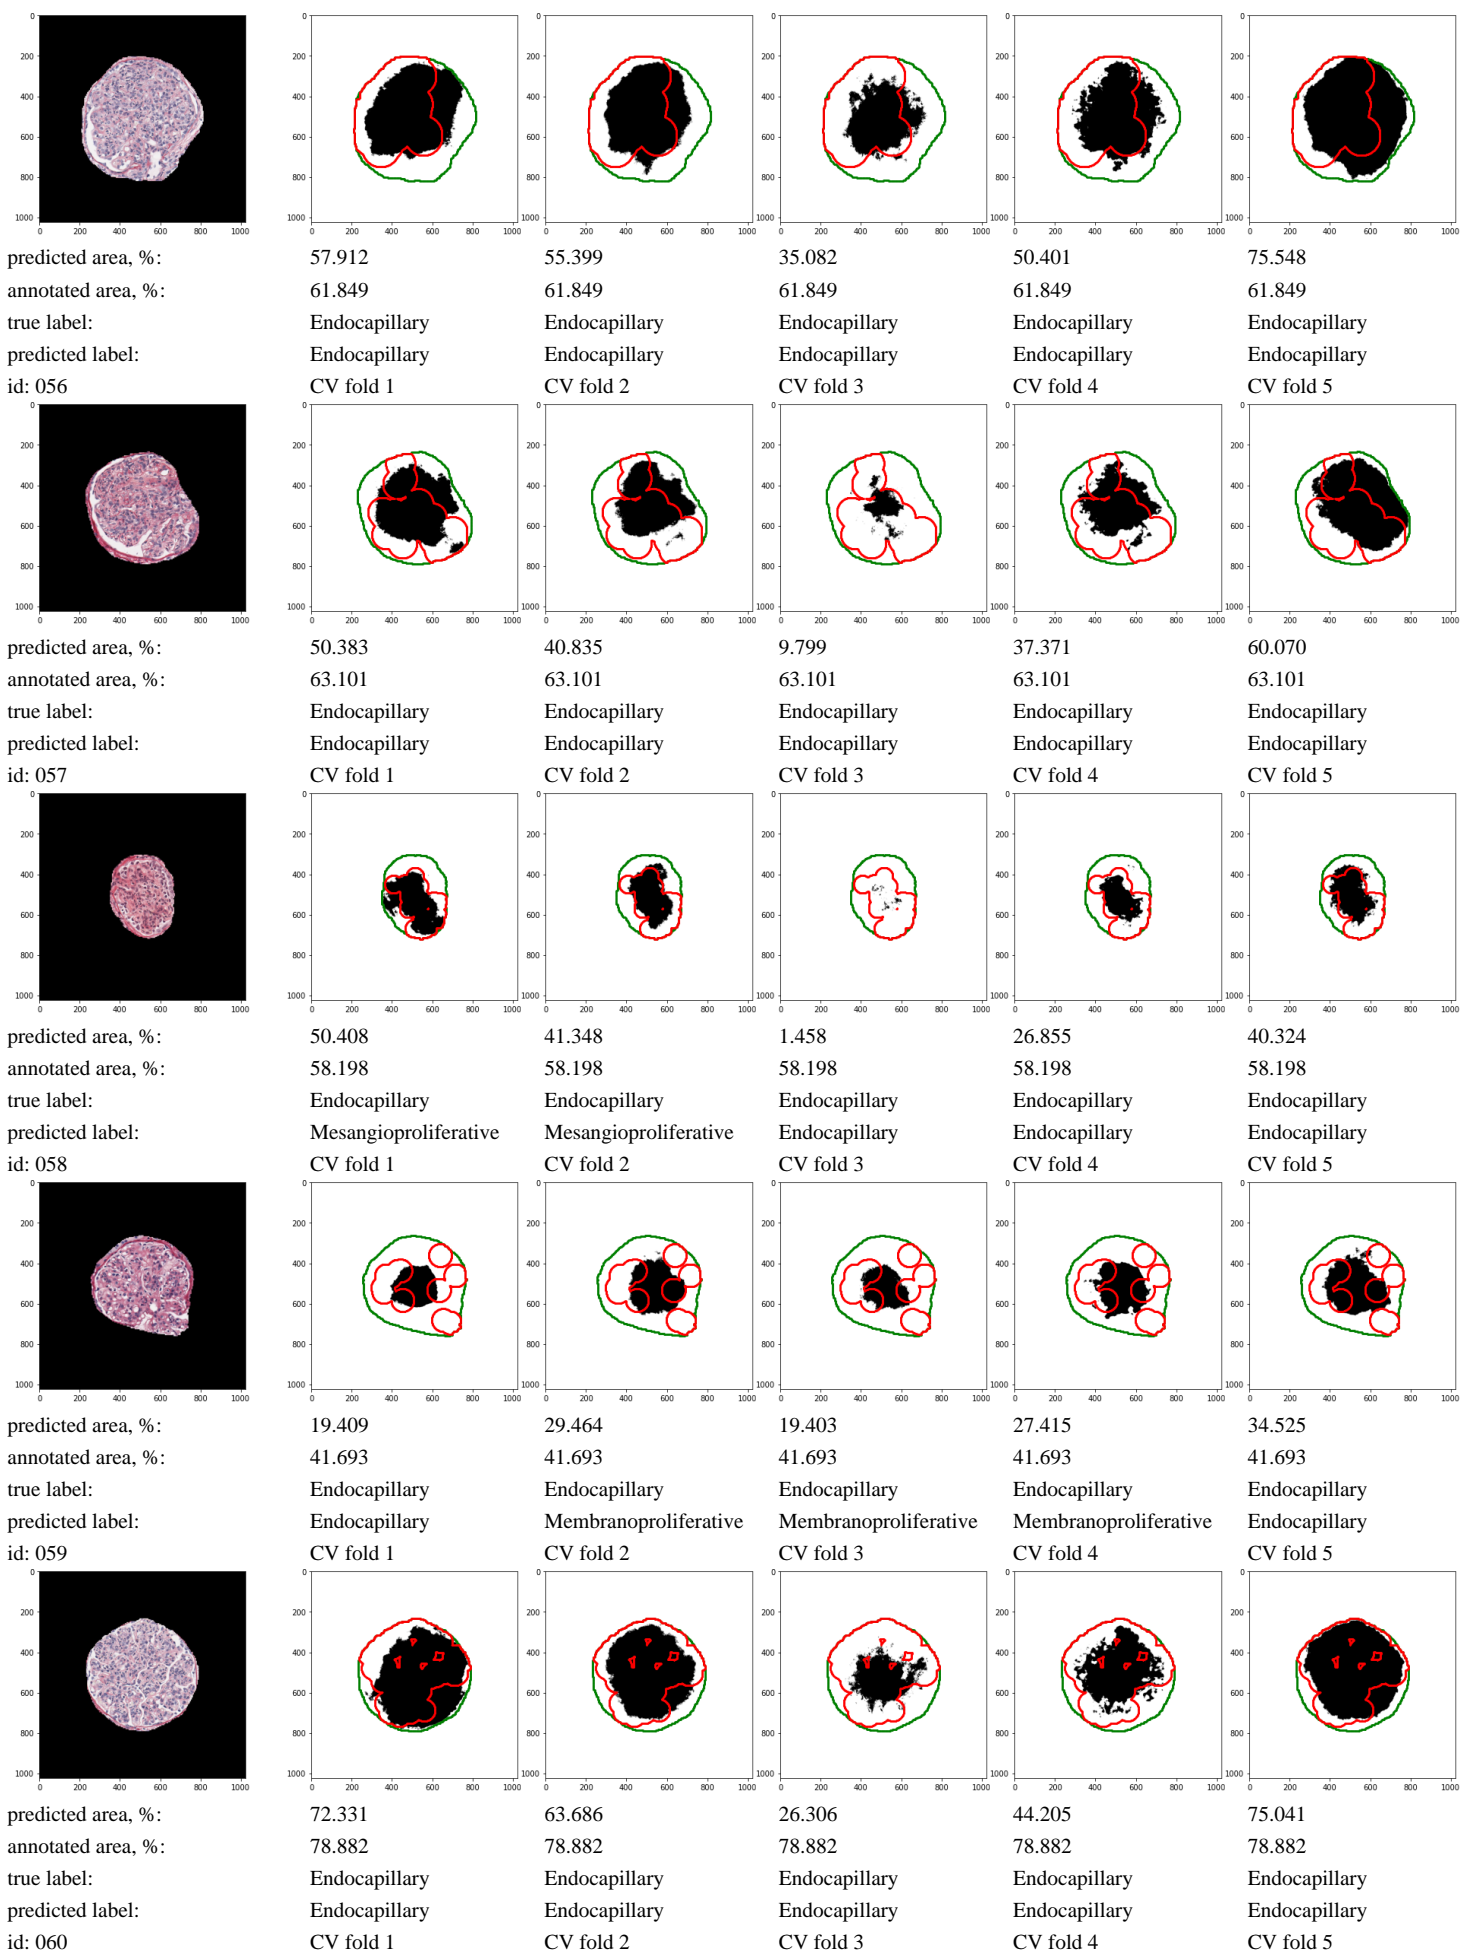

Supplementary Figure S2 (continued). Comparison of pattern quantification results per glomerular basis.

**Red contour:** annotated area @ 0.5 threshold    **Green contour:** total area    **Black fill:** predicted area @ 0.5 threshold

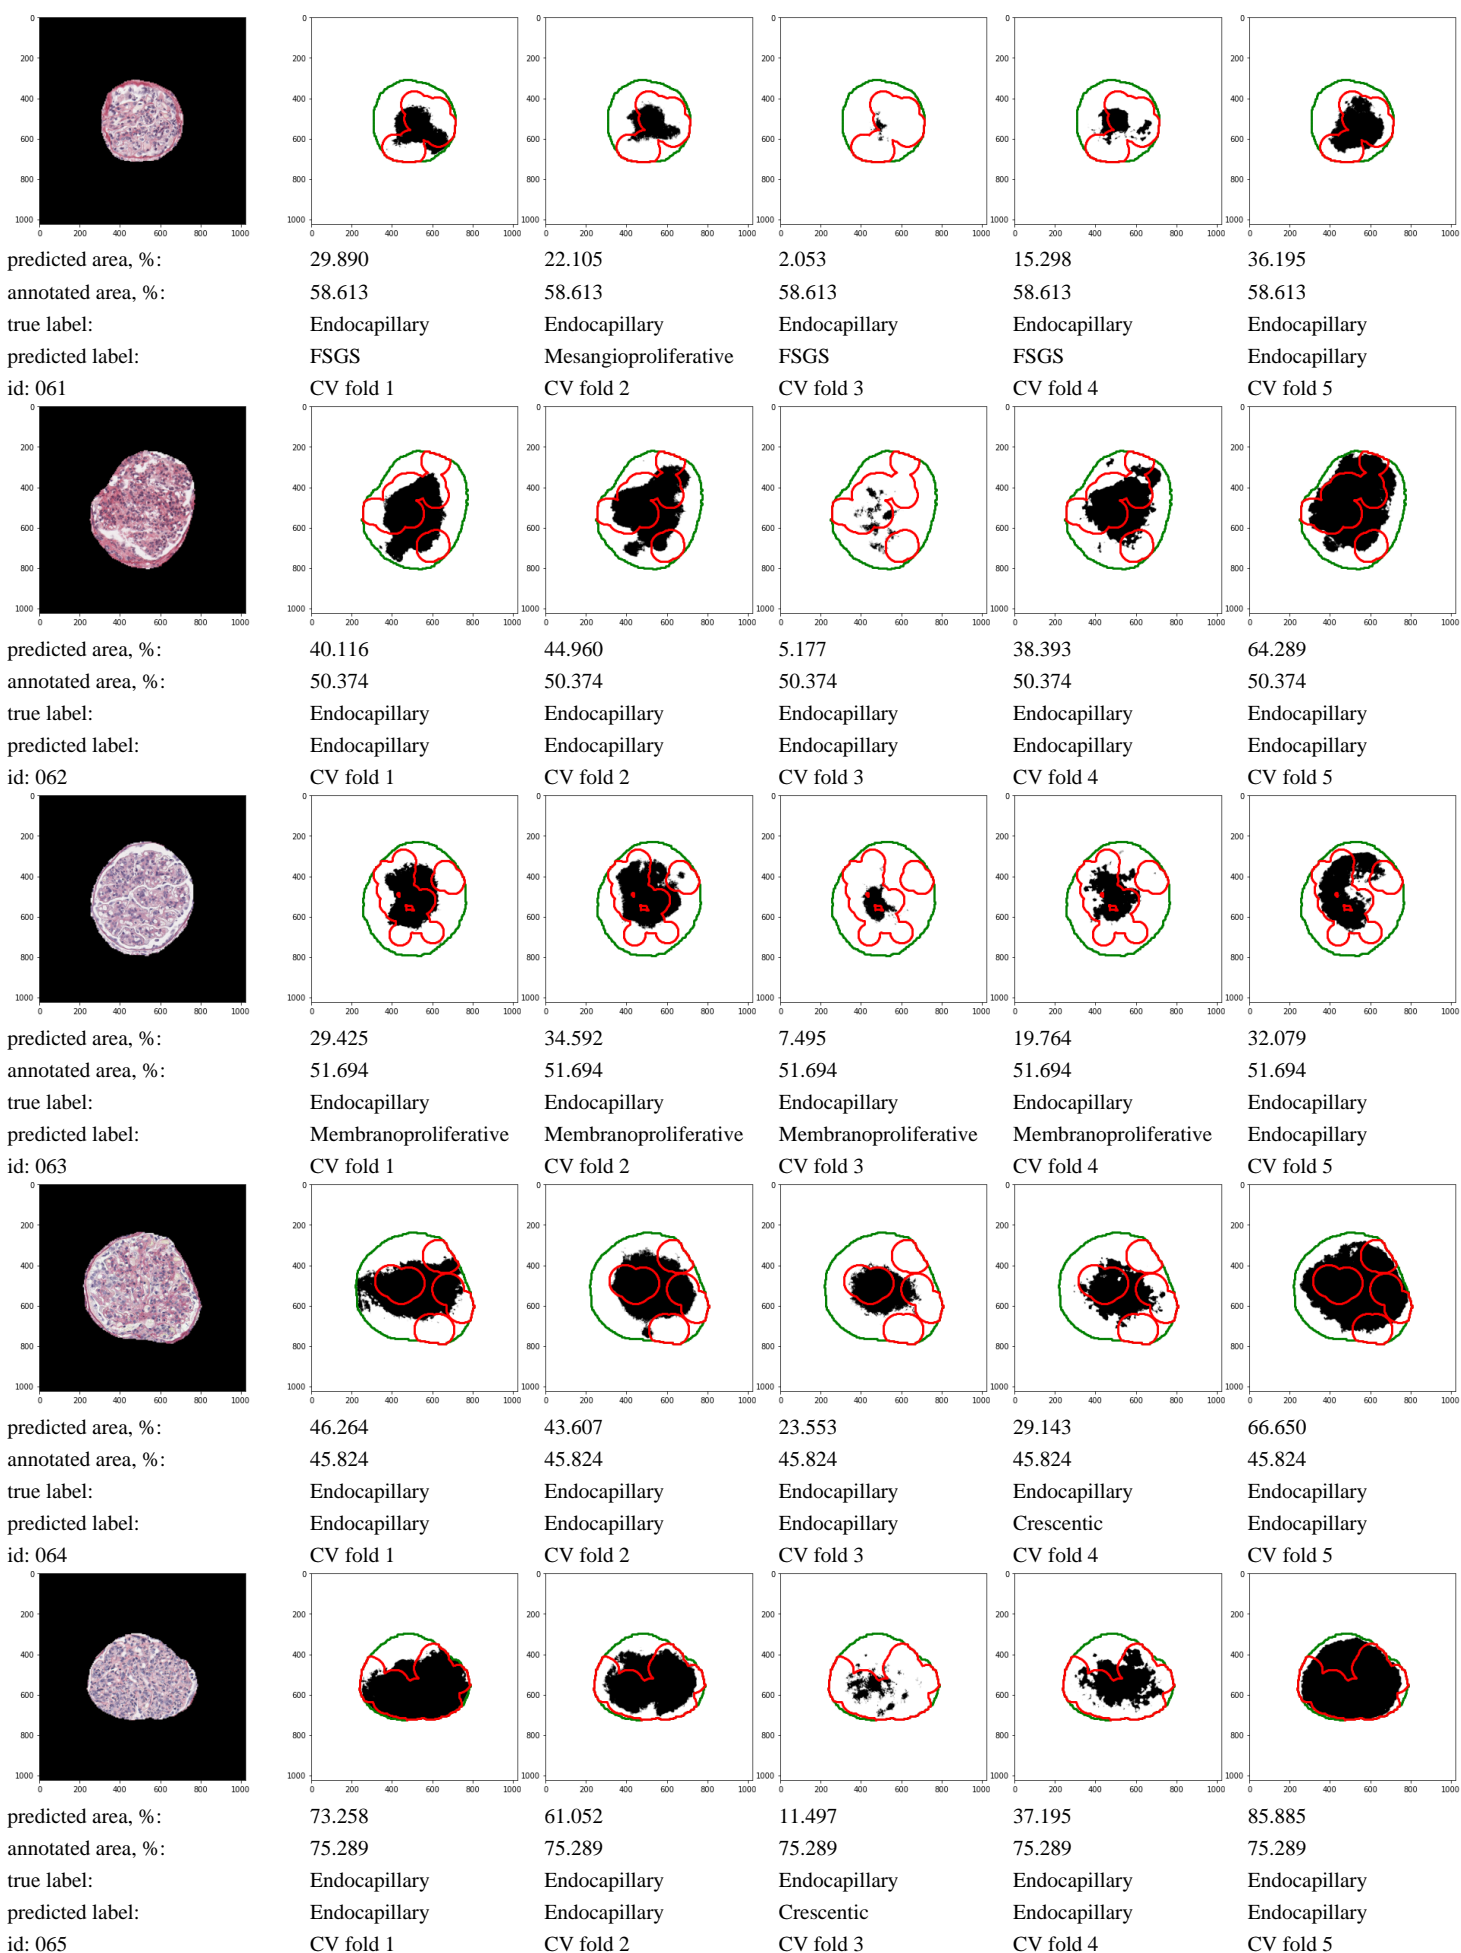

Supplementary Figure S2 (continued). Comparison of pattern quantification results per glomerular basis.

**Red contour:** annotated area @ 0.5 threshold    **Green contour:** total area    **Black fill:** predicted area @ 0.5 threshold

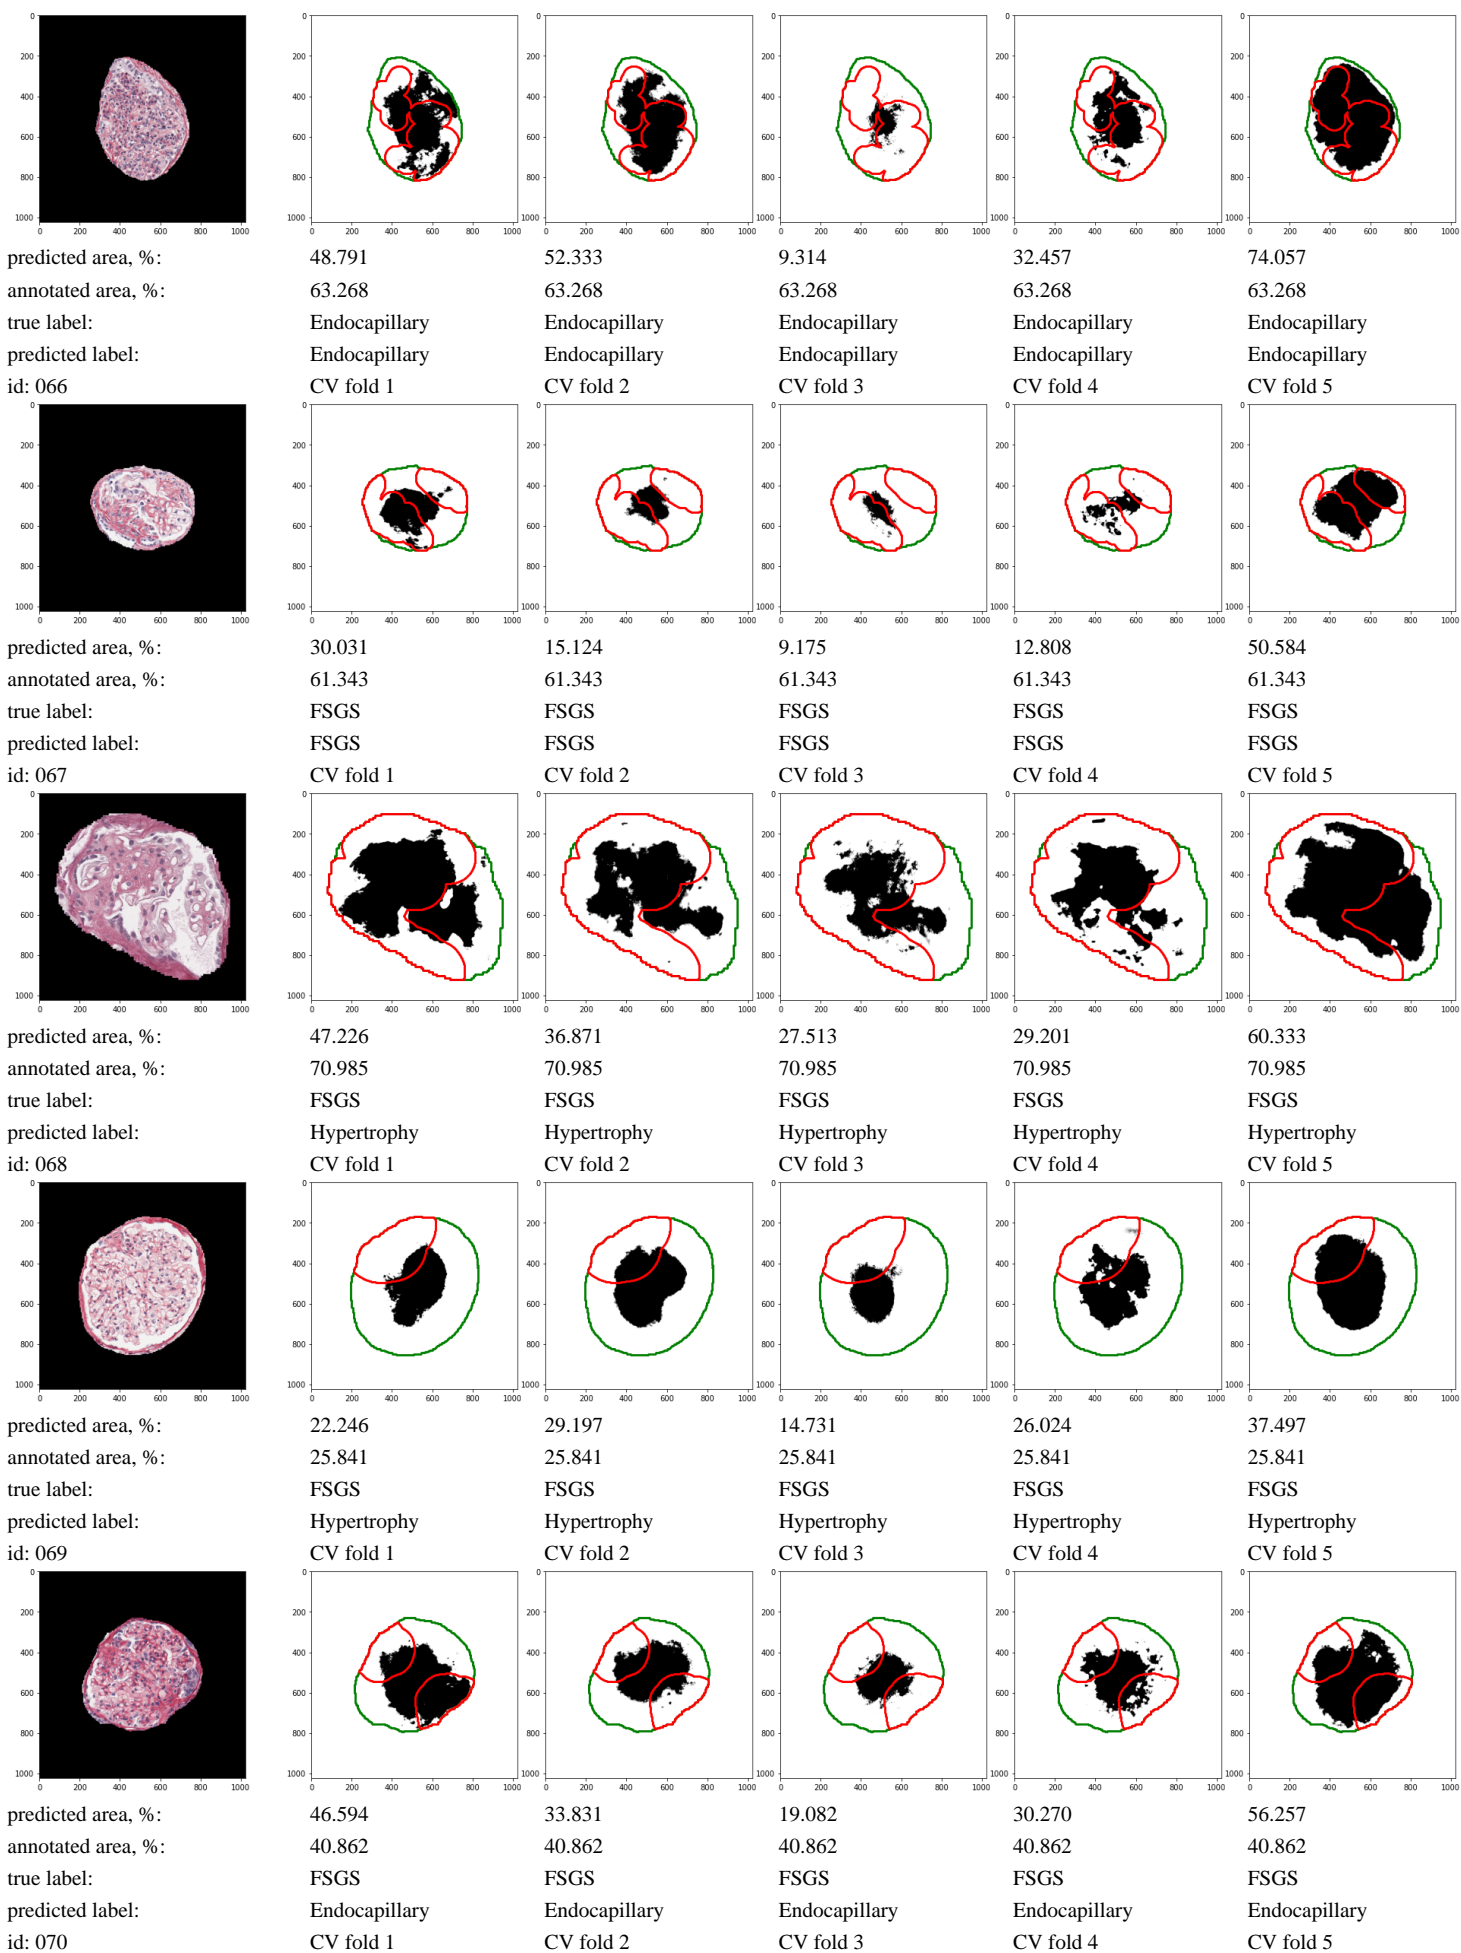

Supplementary Figure S2 (continued). Comparison of pattern quantification results per glomerular basis.

**Red contour:** annotated area @ 0.5 threshold    **Green contour:** total area    **Black fill:** predicted area @ 0.5 threshold

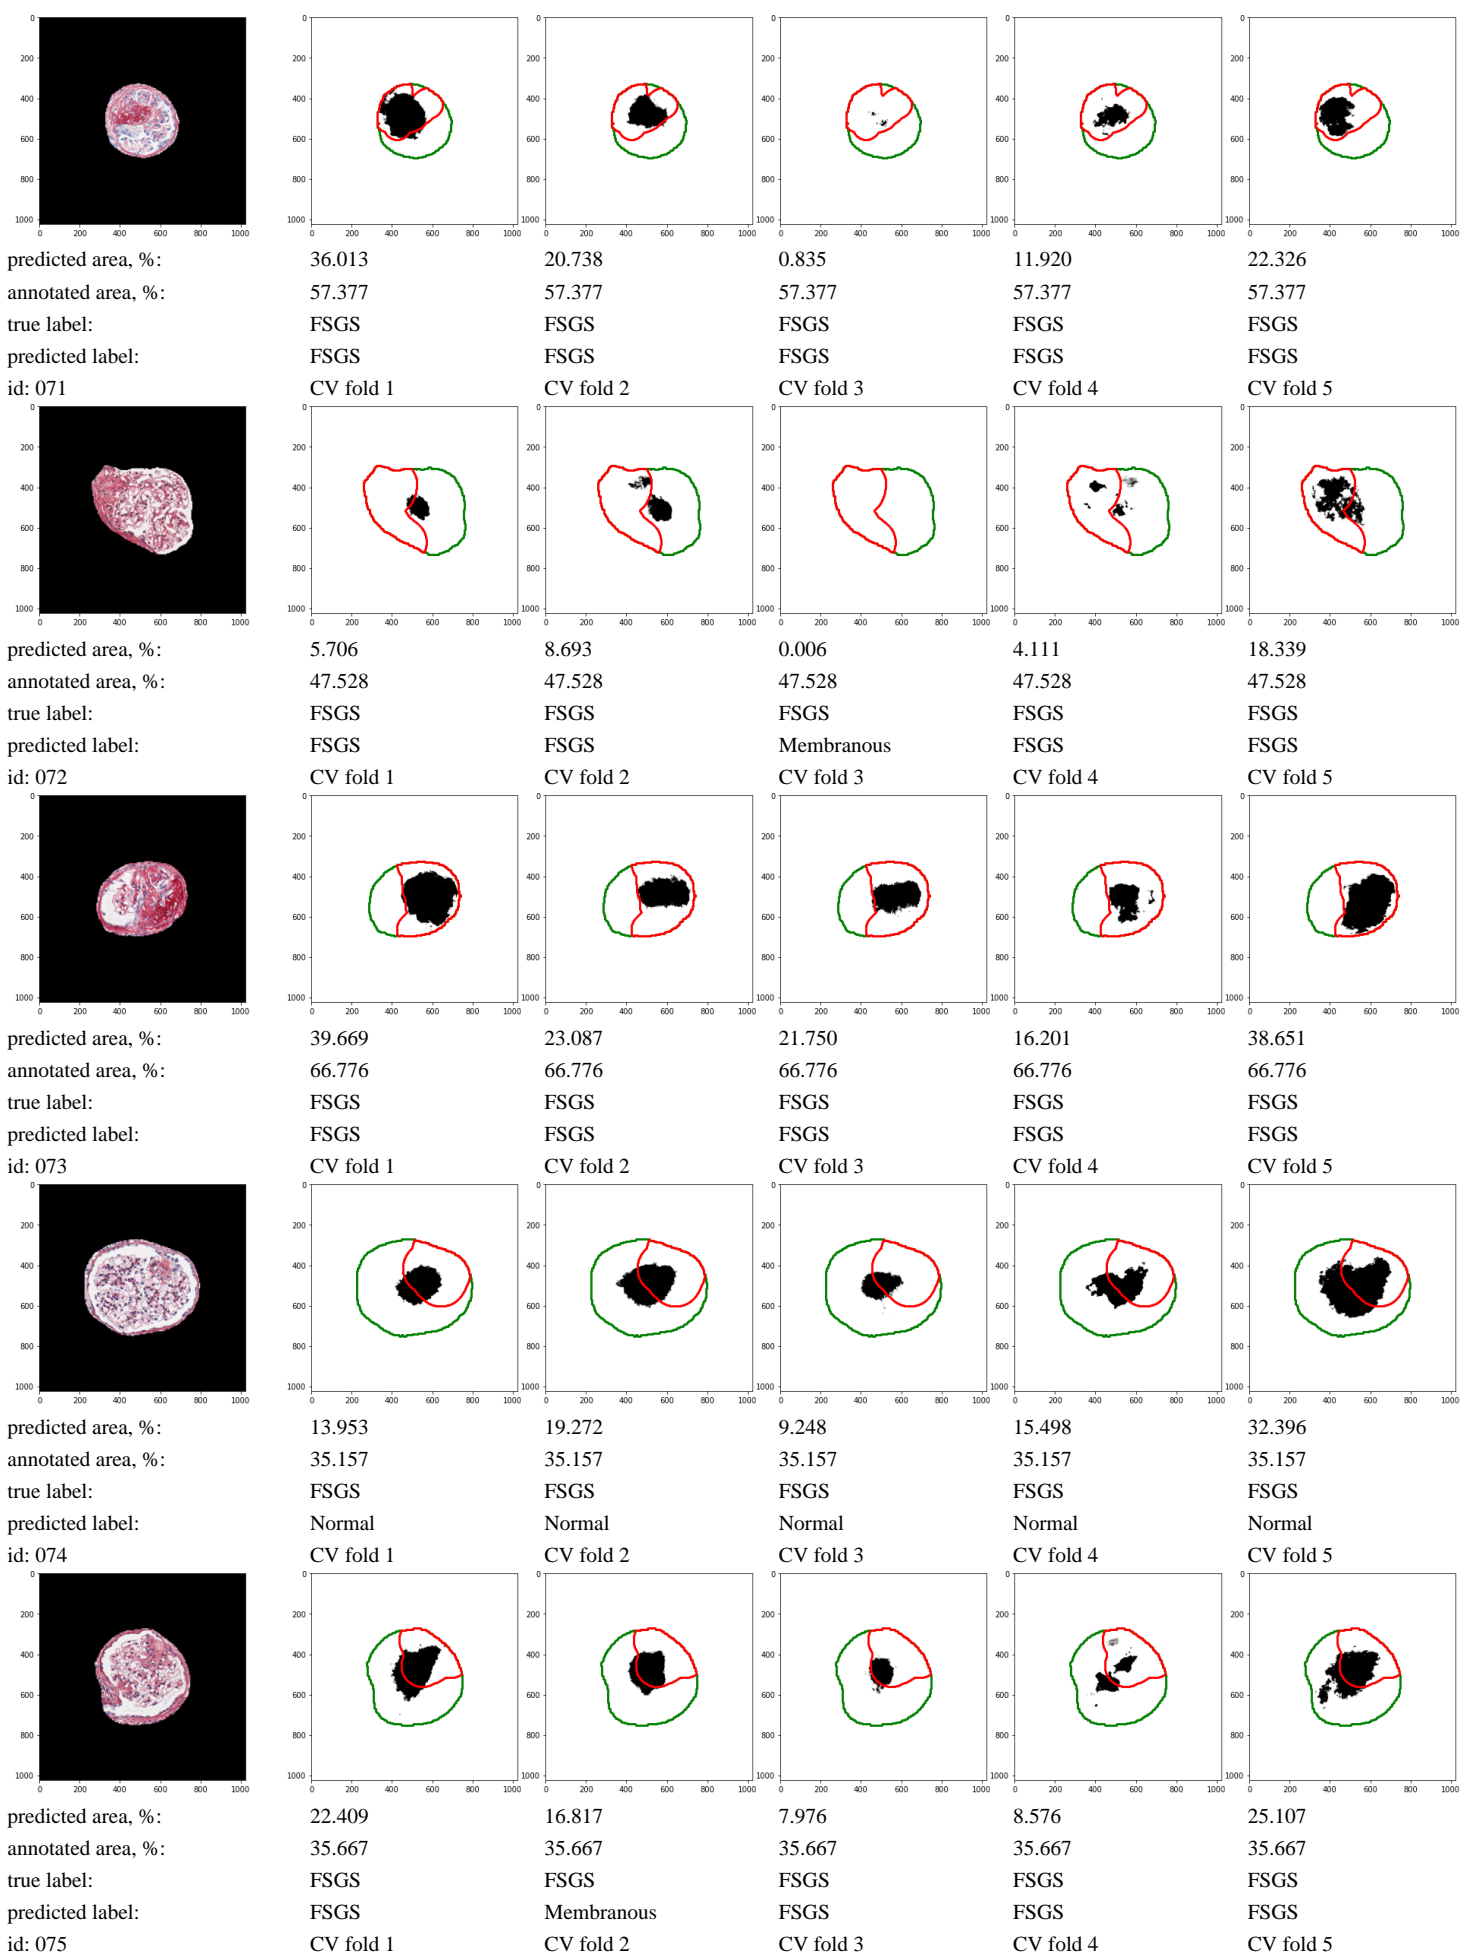

Supplementary Figure S2 (continued). Comparison of pattern quantification results per glomerular basis.

**Red contour:** annotated area @ 0.5 threshold    **Green contour:** total area    **Black fill:** predicted area @ 0.5 threshold

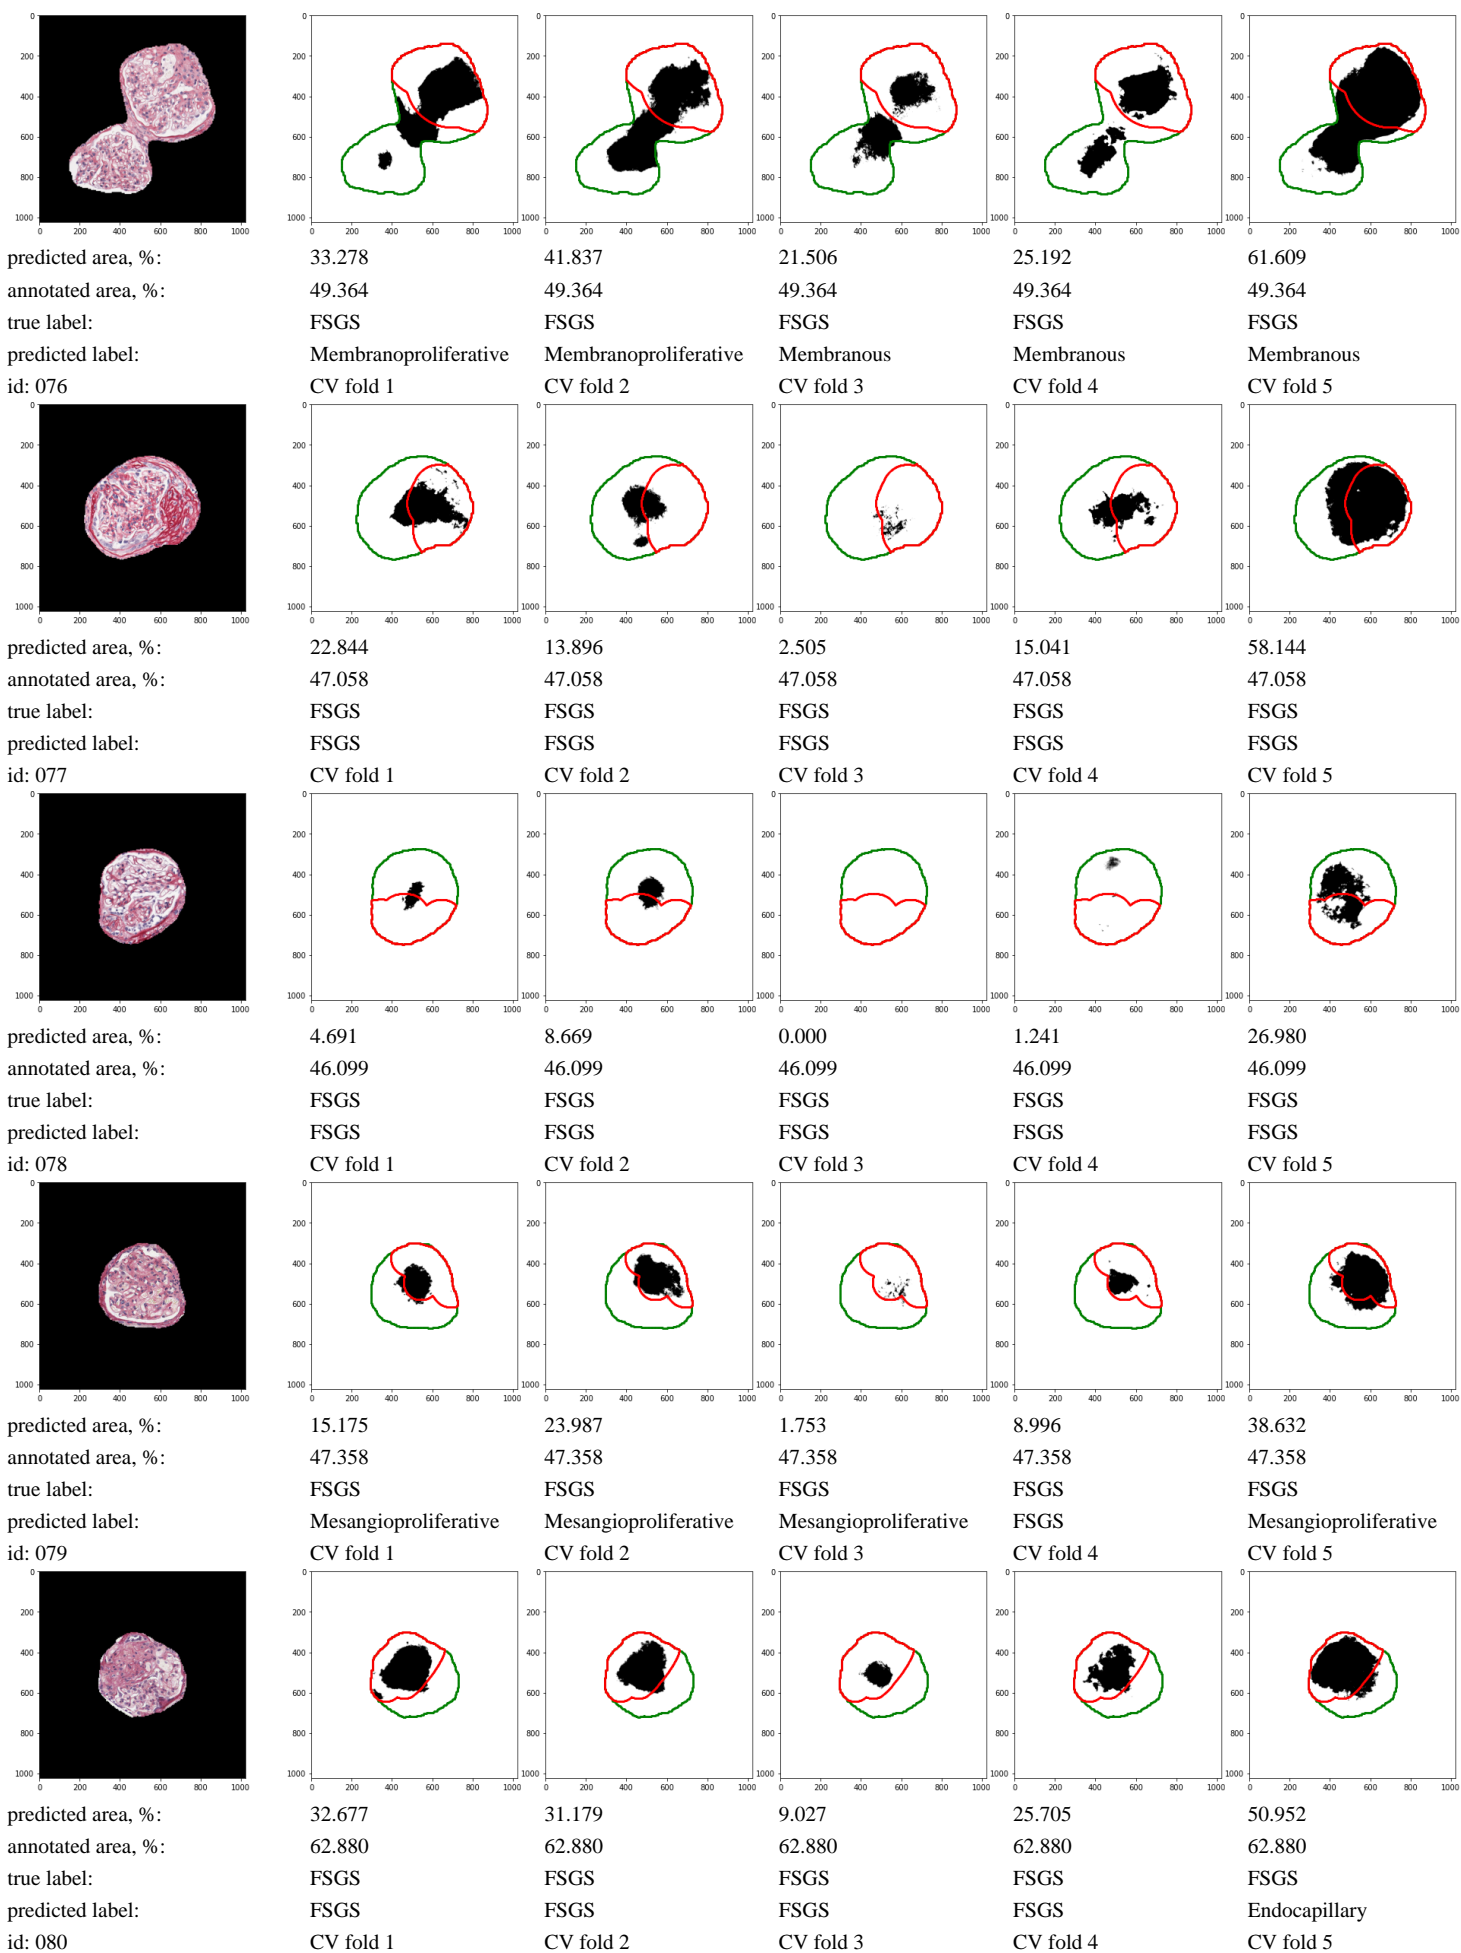

Supplementary Figure S2 (continued). Comparison of pattern quantification results per glomerular basis.





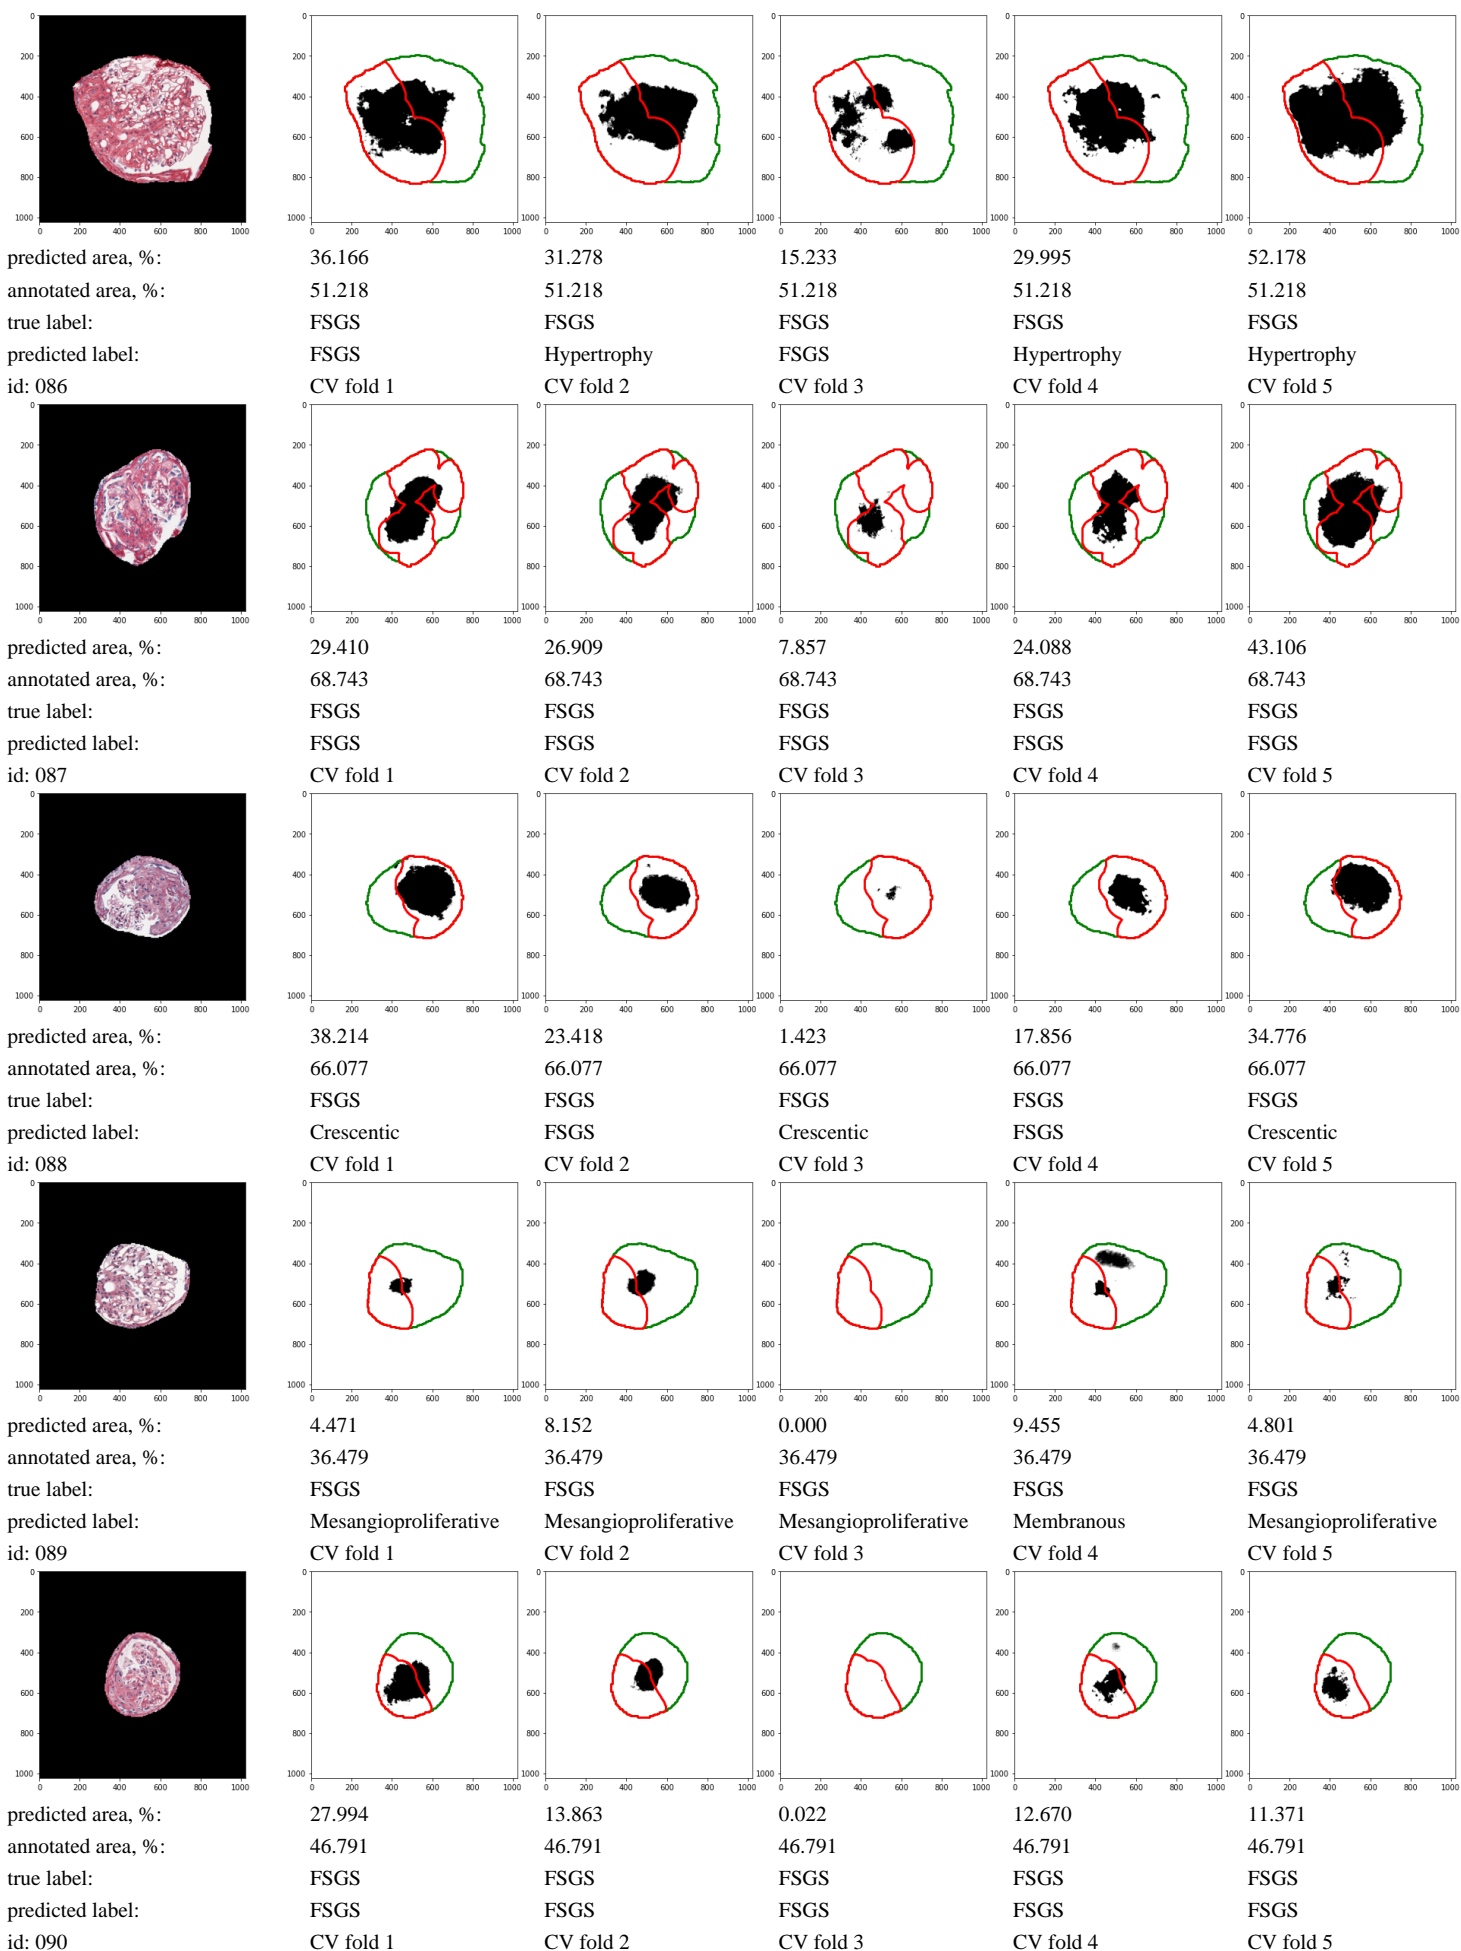

Supplementary Figure S2 (continued). Comparison of pattern quantification results per glomerular basis.

**Red contour:** annotated area @ 0.5 threshold    **Green contour:** total area    **Black fill:** predicted area @ 0.5 threshold



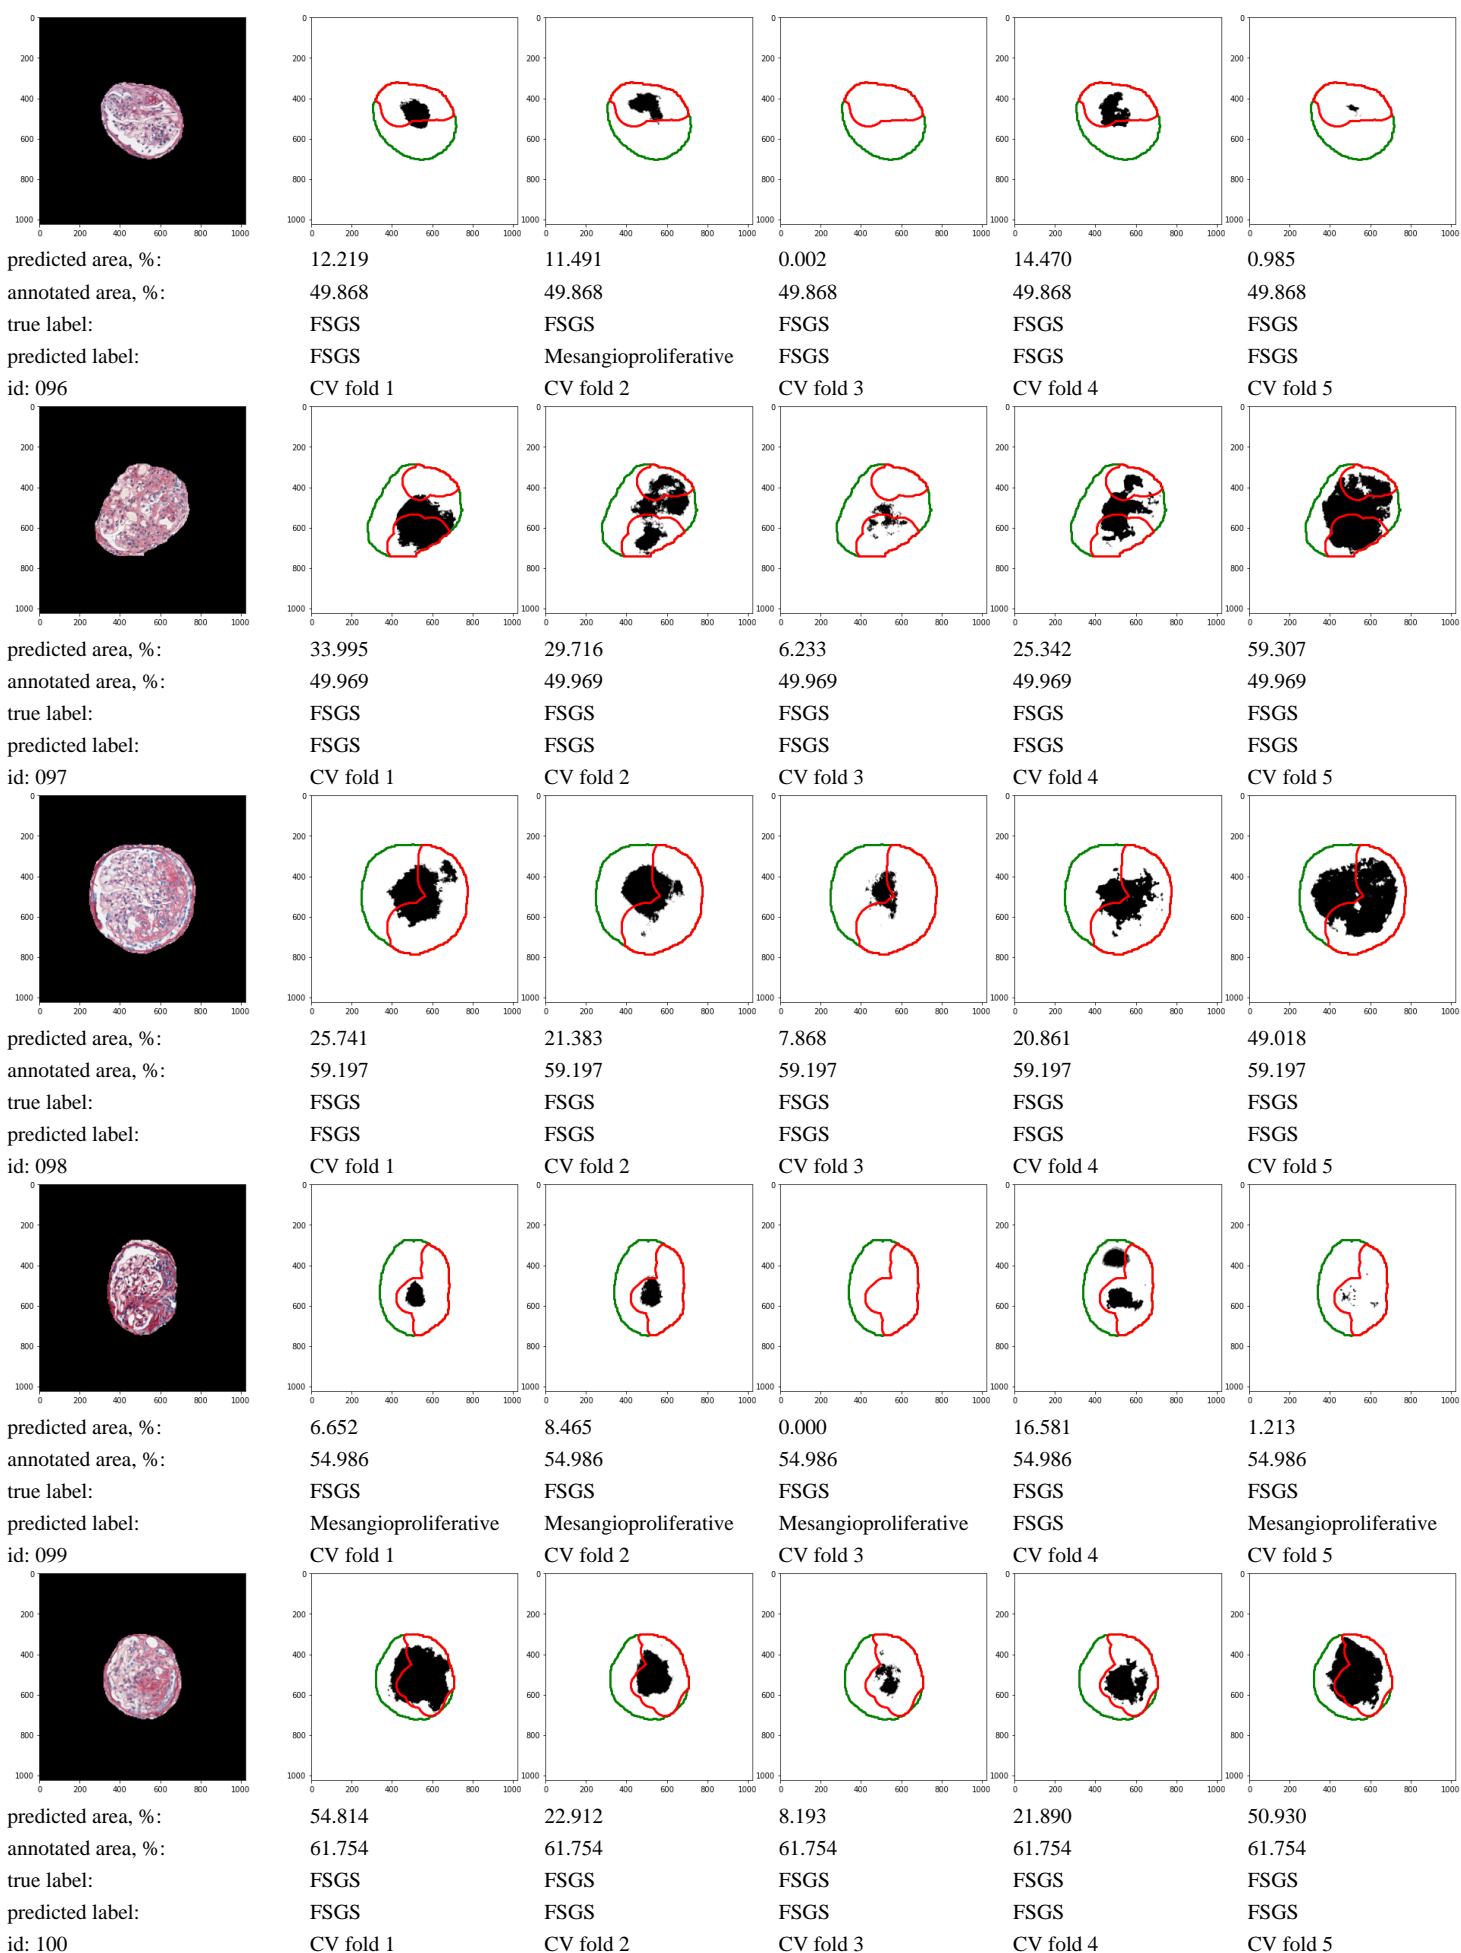

Supplementary Figure S2 (continued). Comparison of pattern quantification results per glomerular basis.



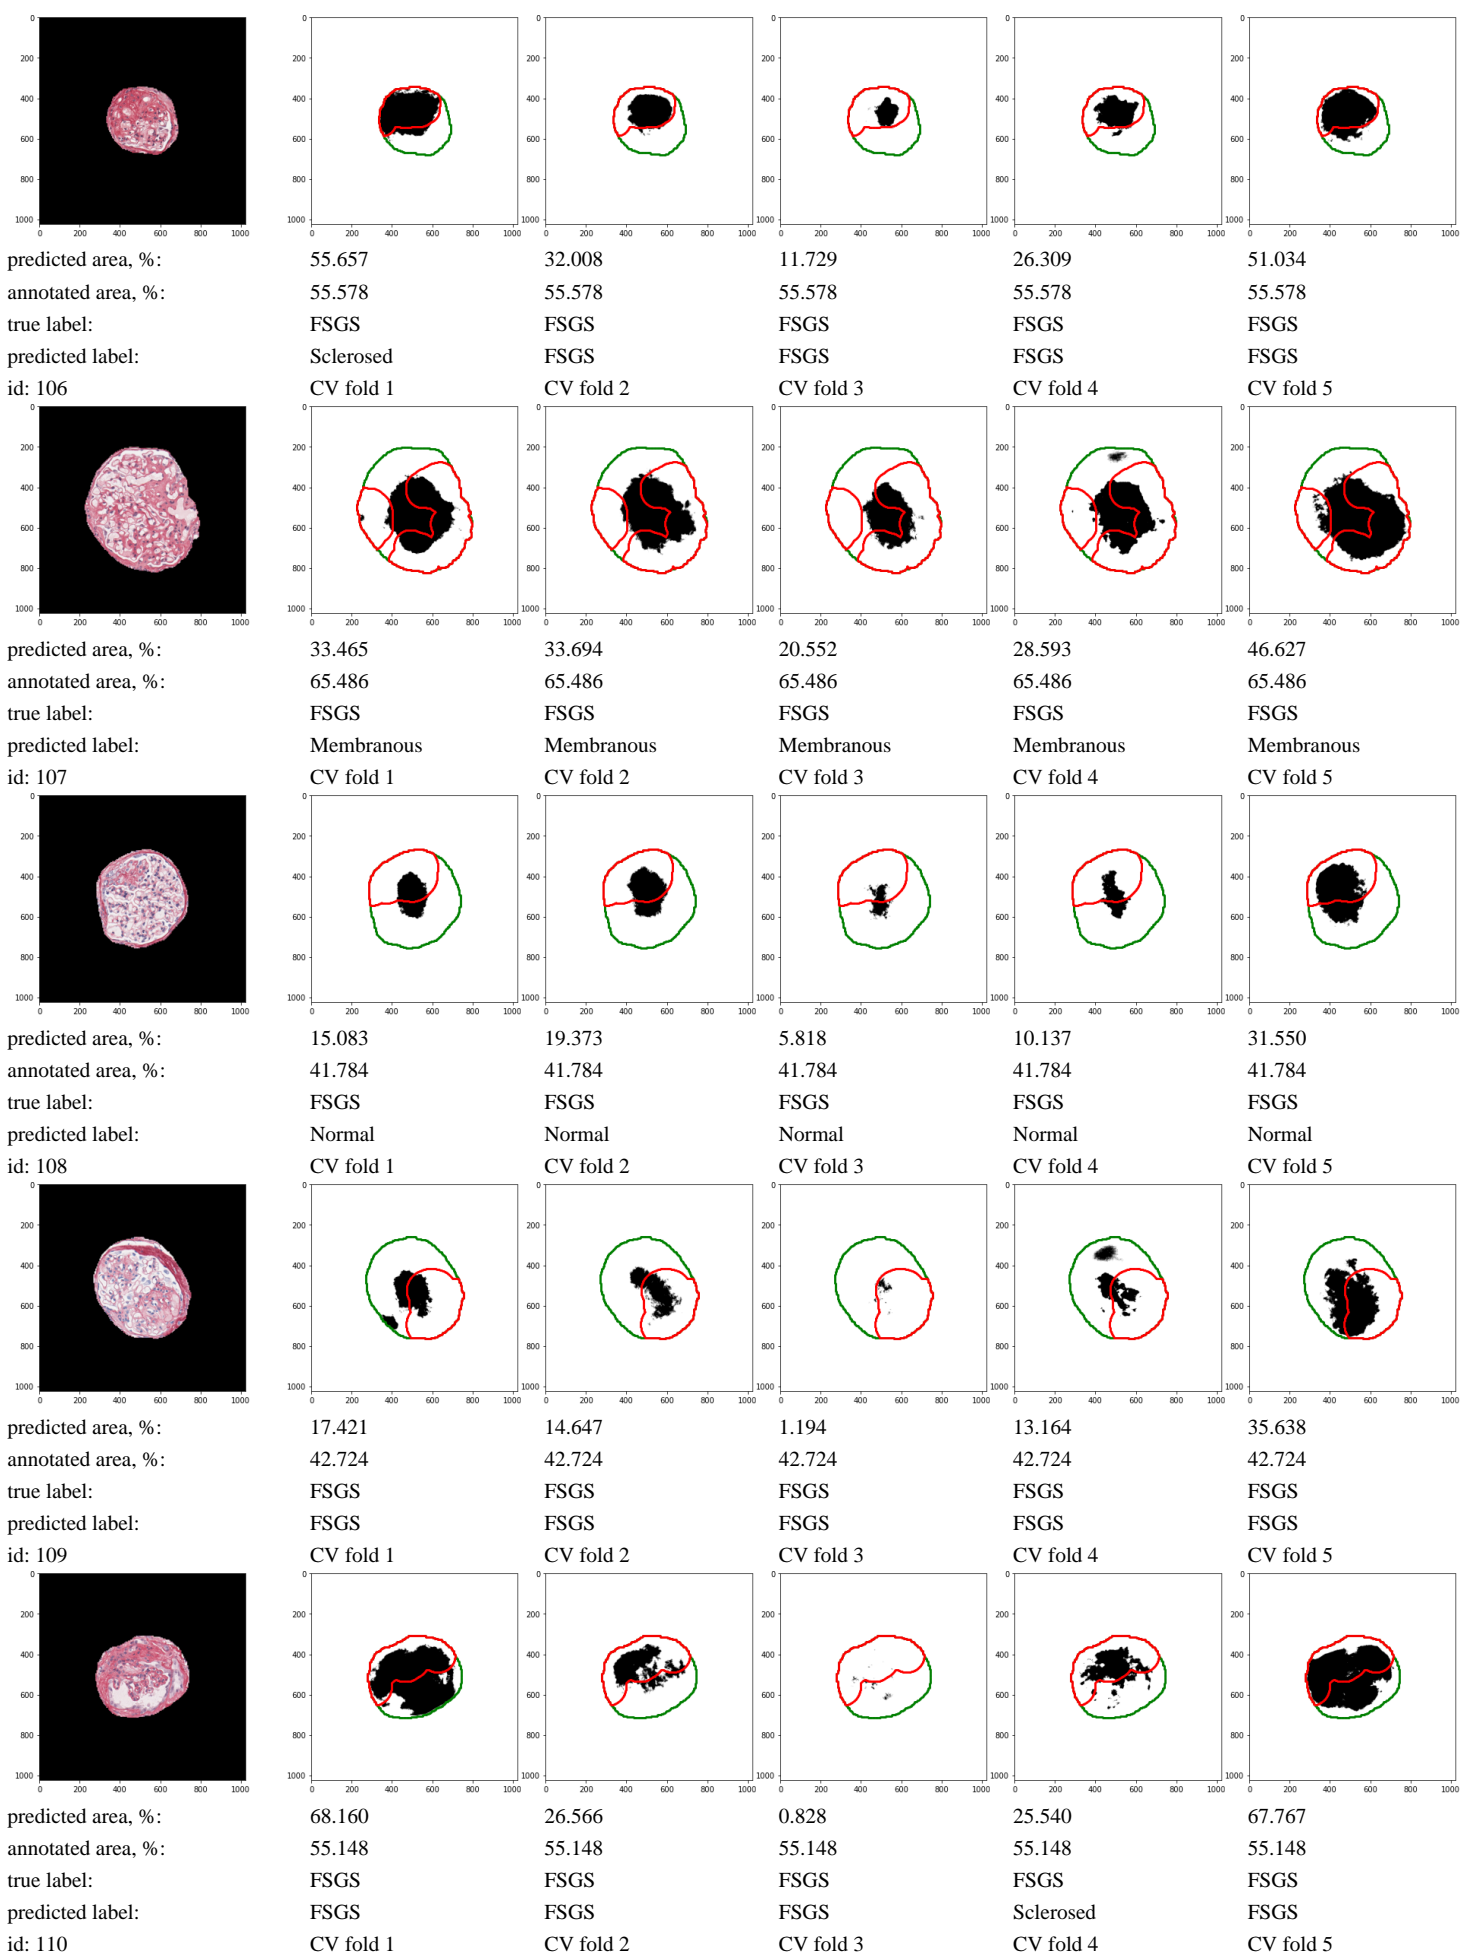



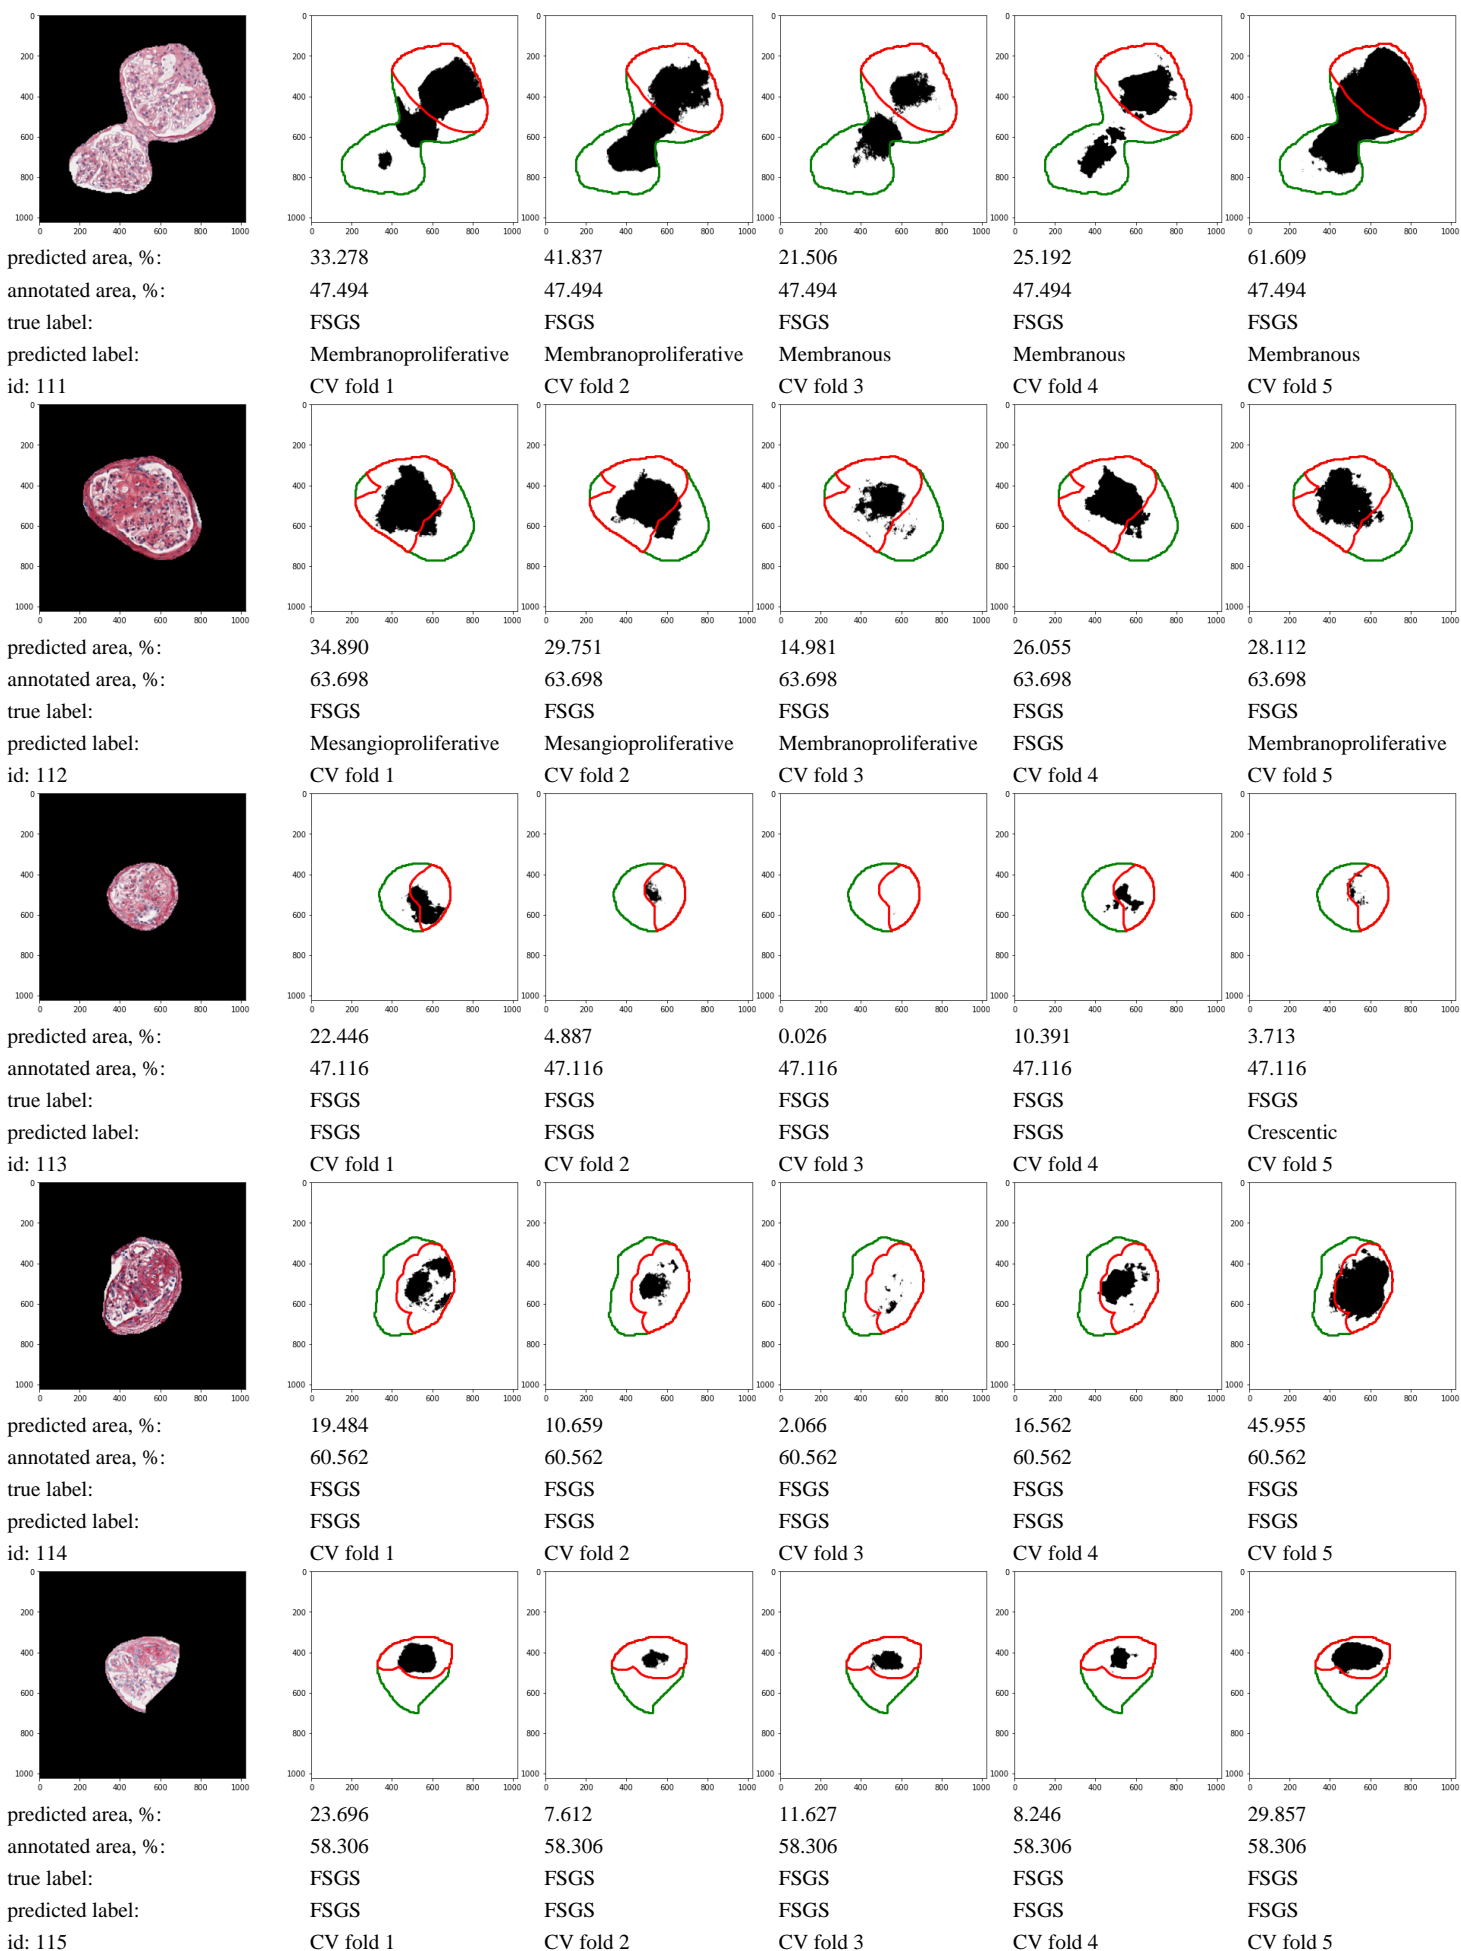

Supplementary Figure S2 (continued). Comparison of pattern quantification results per glomerular basis.

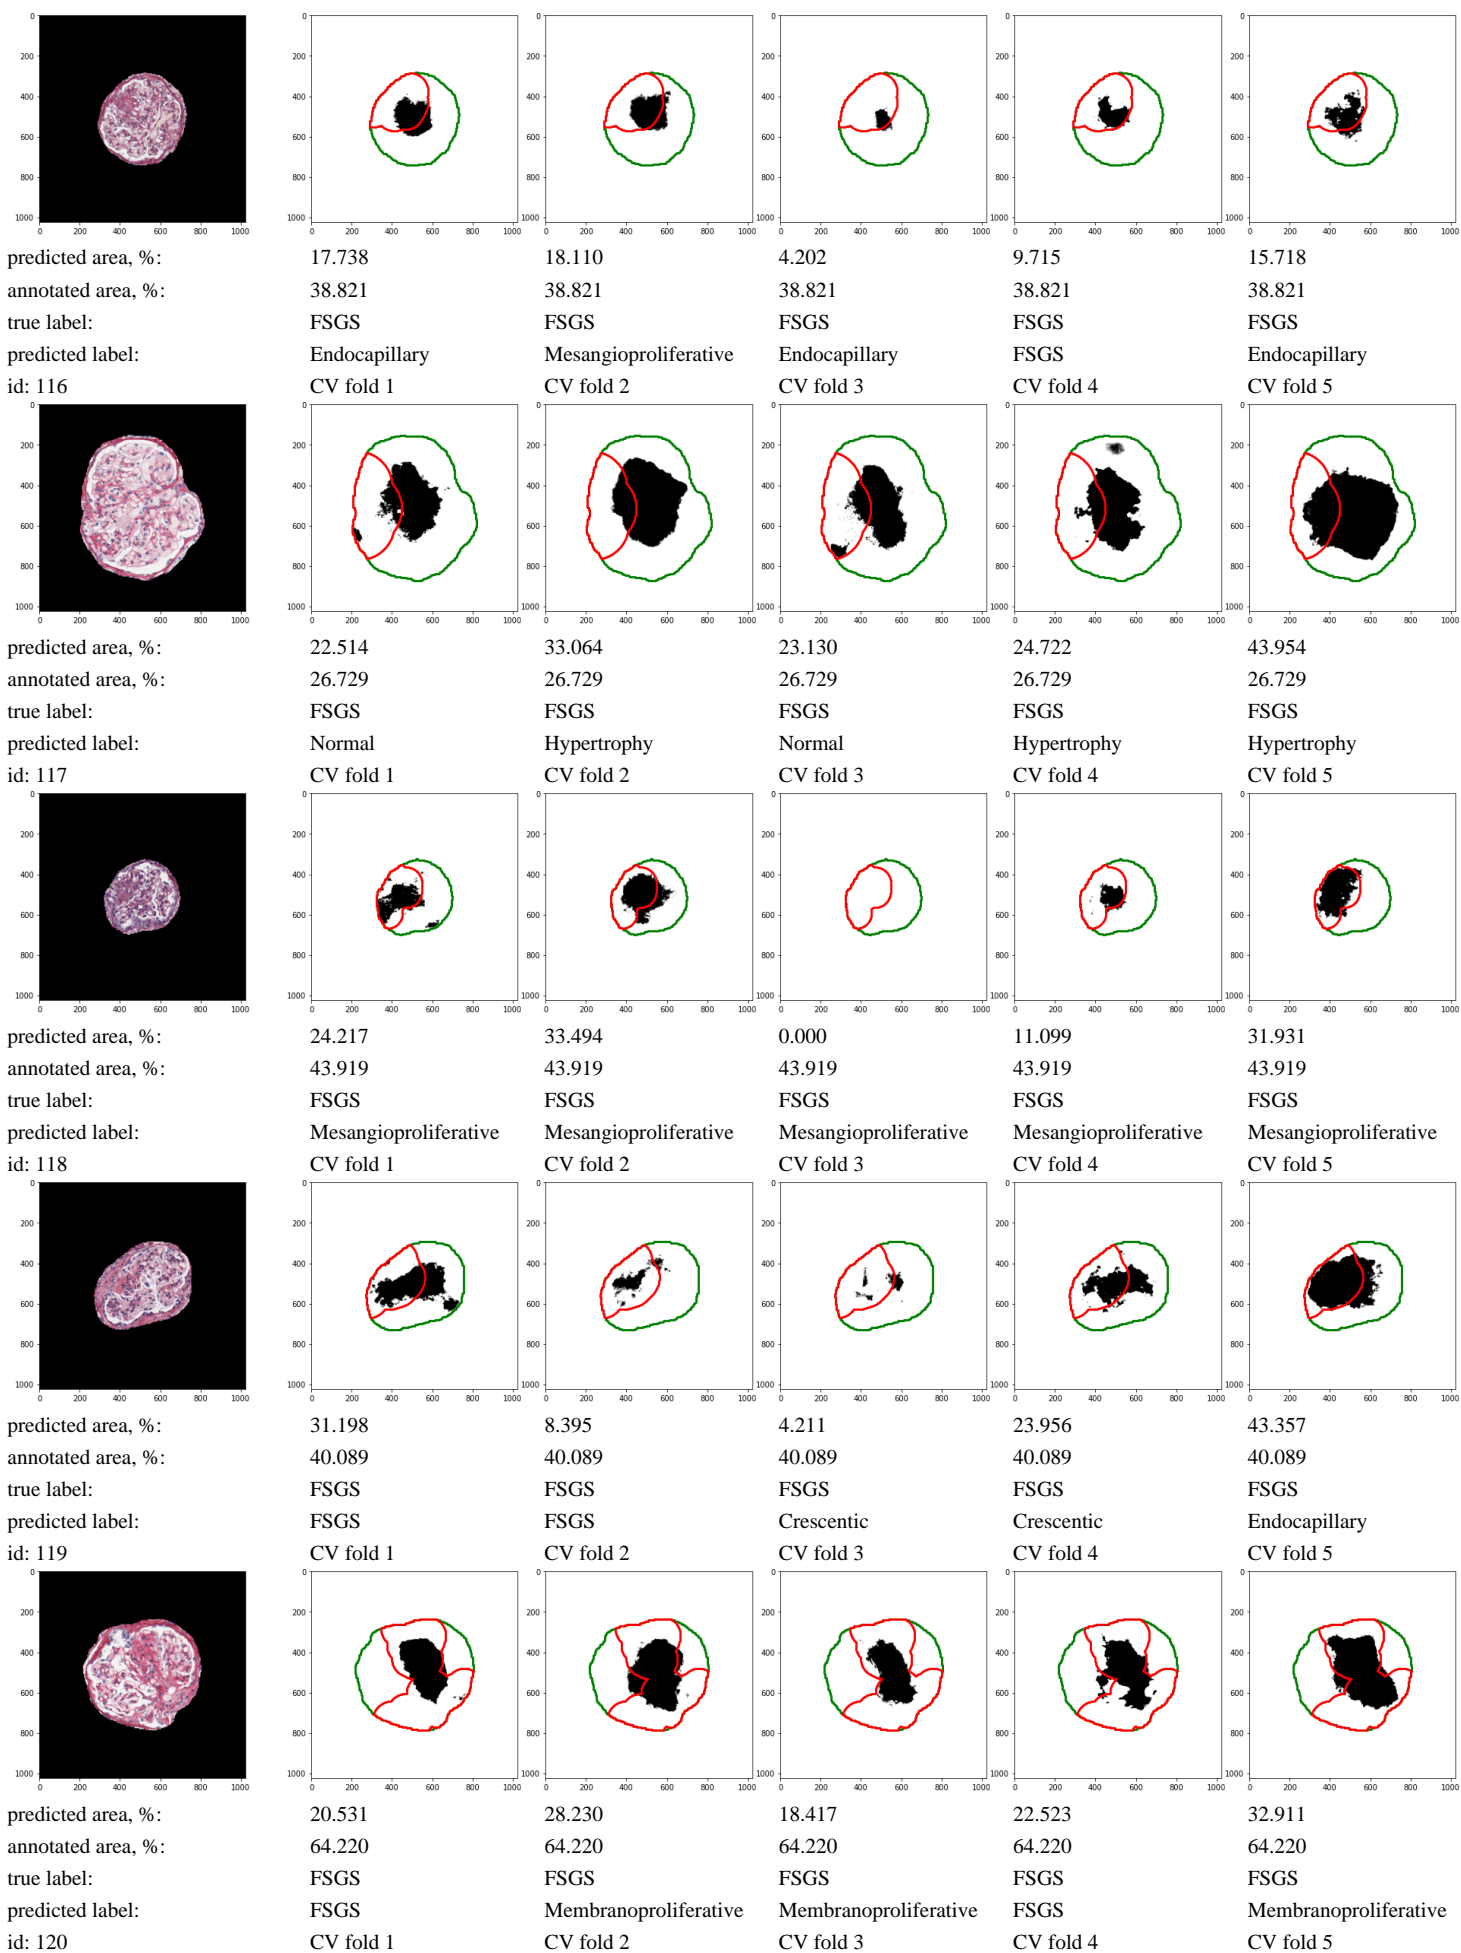

Supplementary Figure S2 (continued). Comparison of pattern quantification results per glomerular basis.

**Red contour:** annotated area @ 0.5 threshold    **Green contour:** total area    **Black fill:** predicted area @ 0.5 threshold

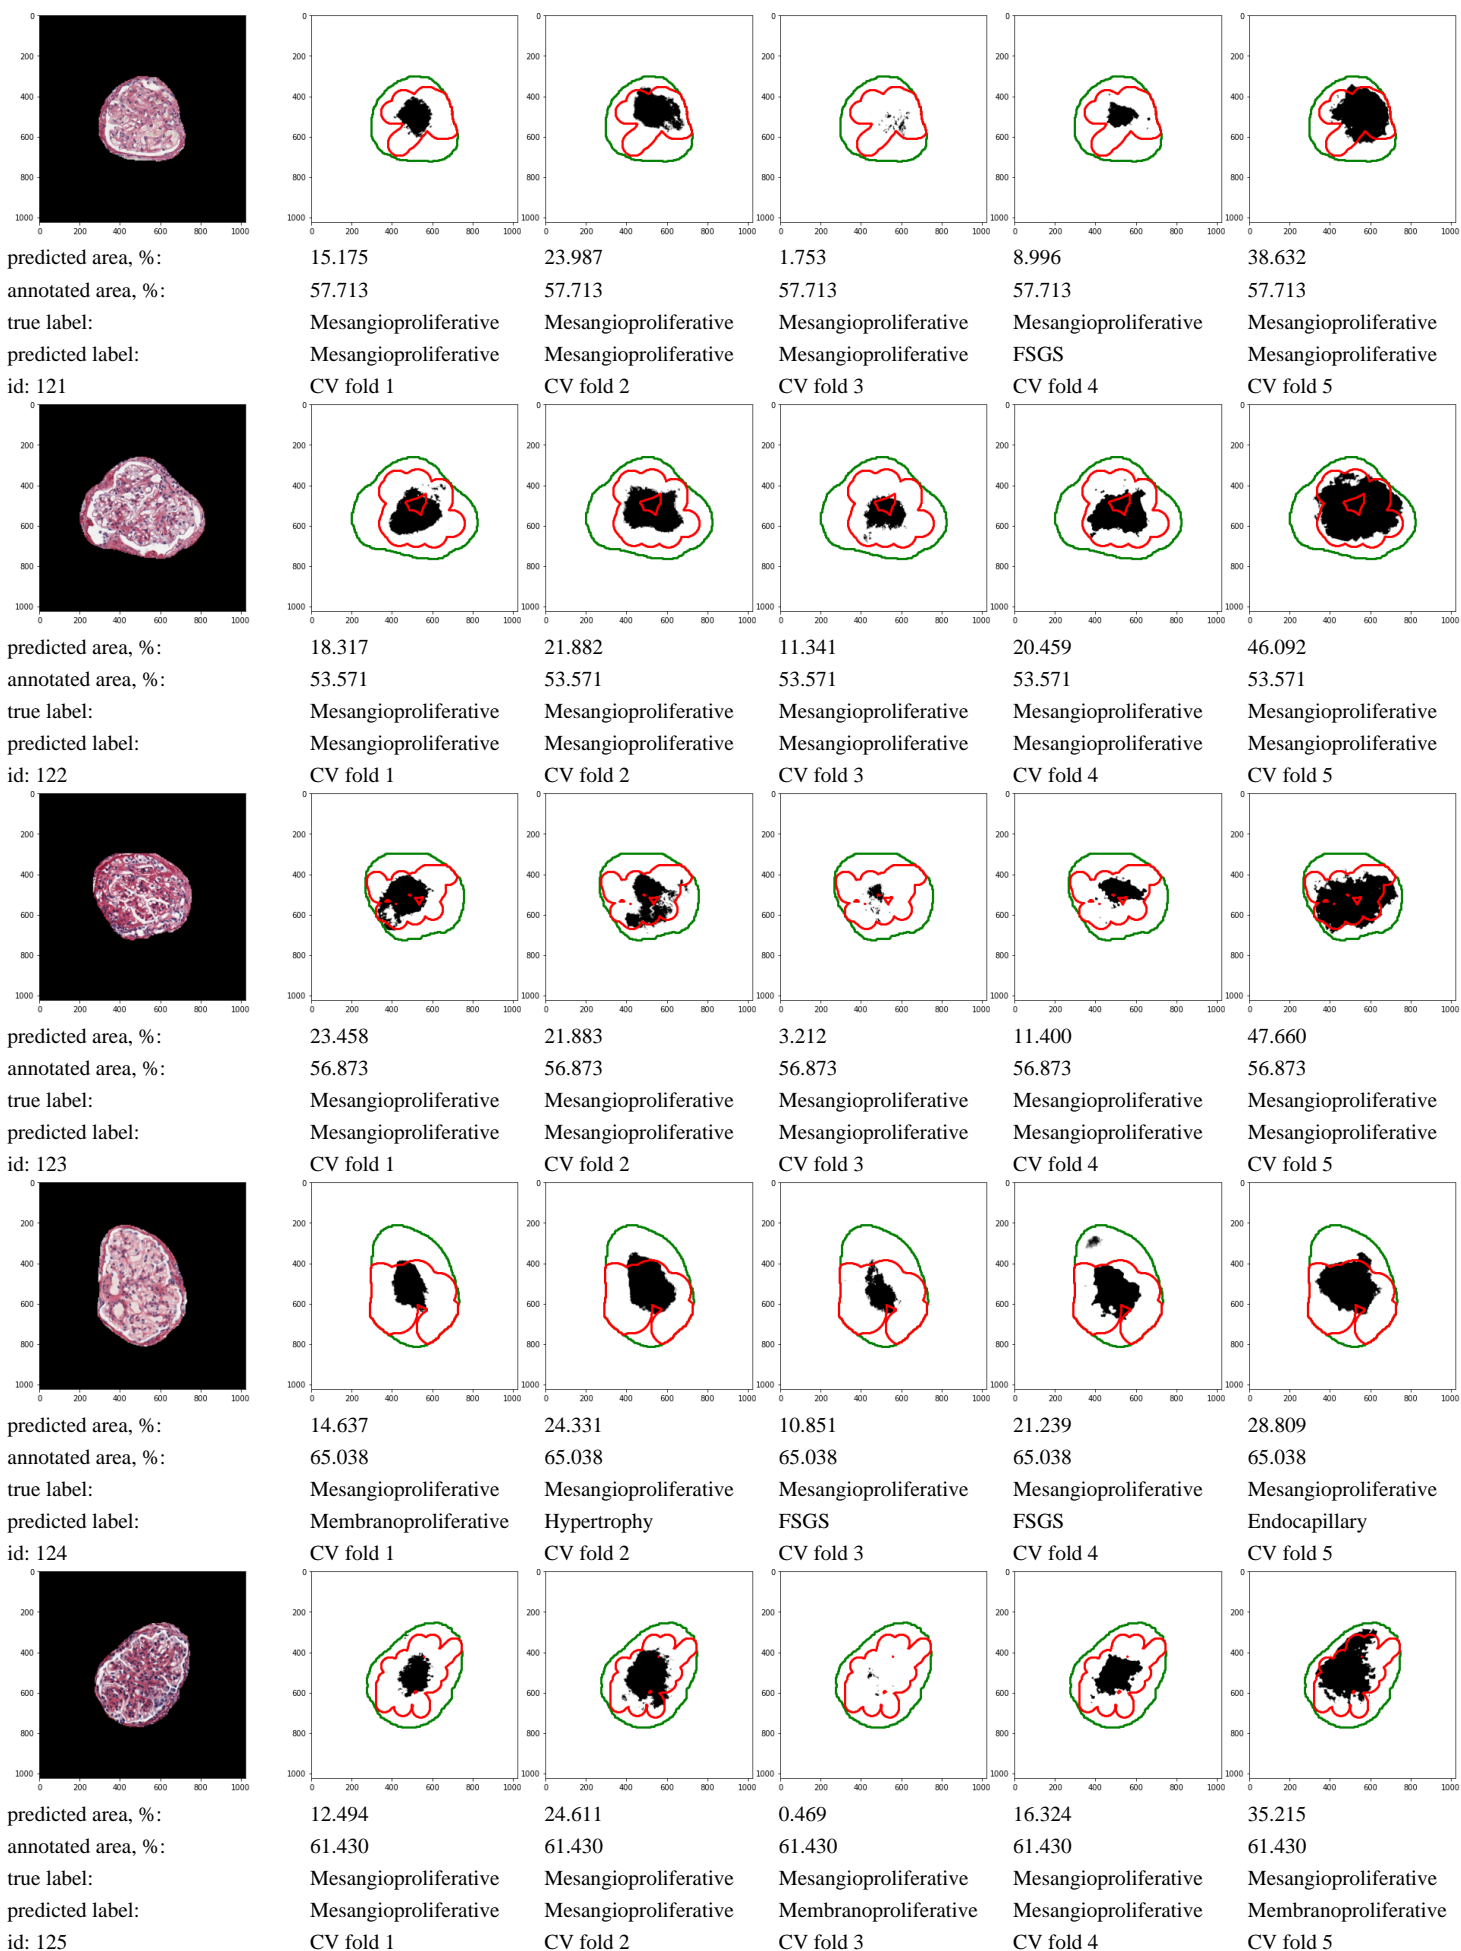

Supplementary Figure S2 (continued). Comparison of pattern quantification results per glomerular basis.

**Red contour:** annotated area @ 0.5 threshold    **Green contour:** total area    **Black fill:** predicted area @ 0.5 threshold

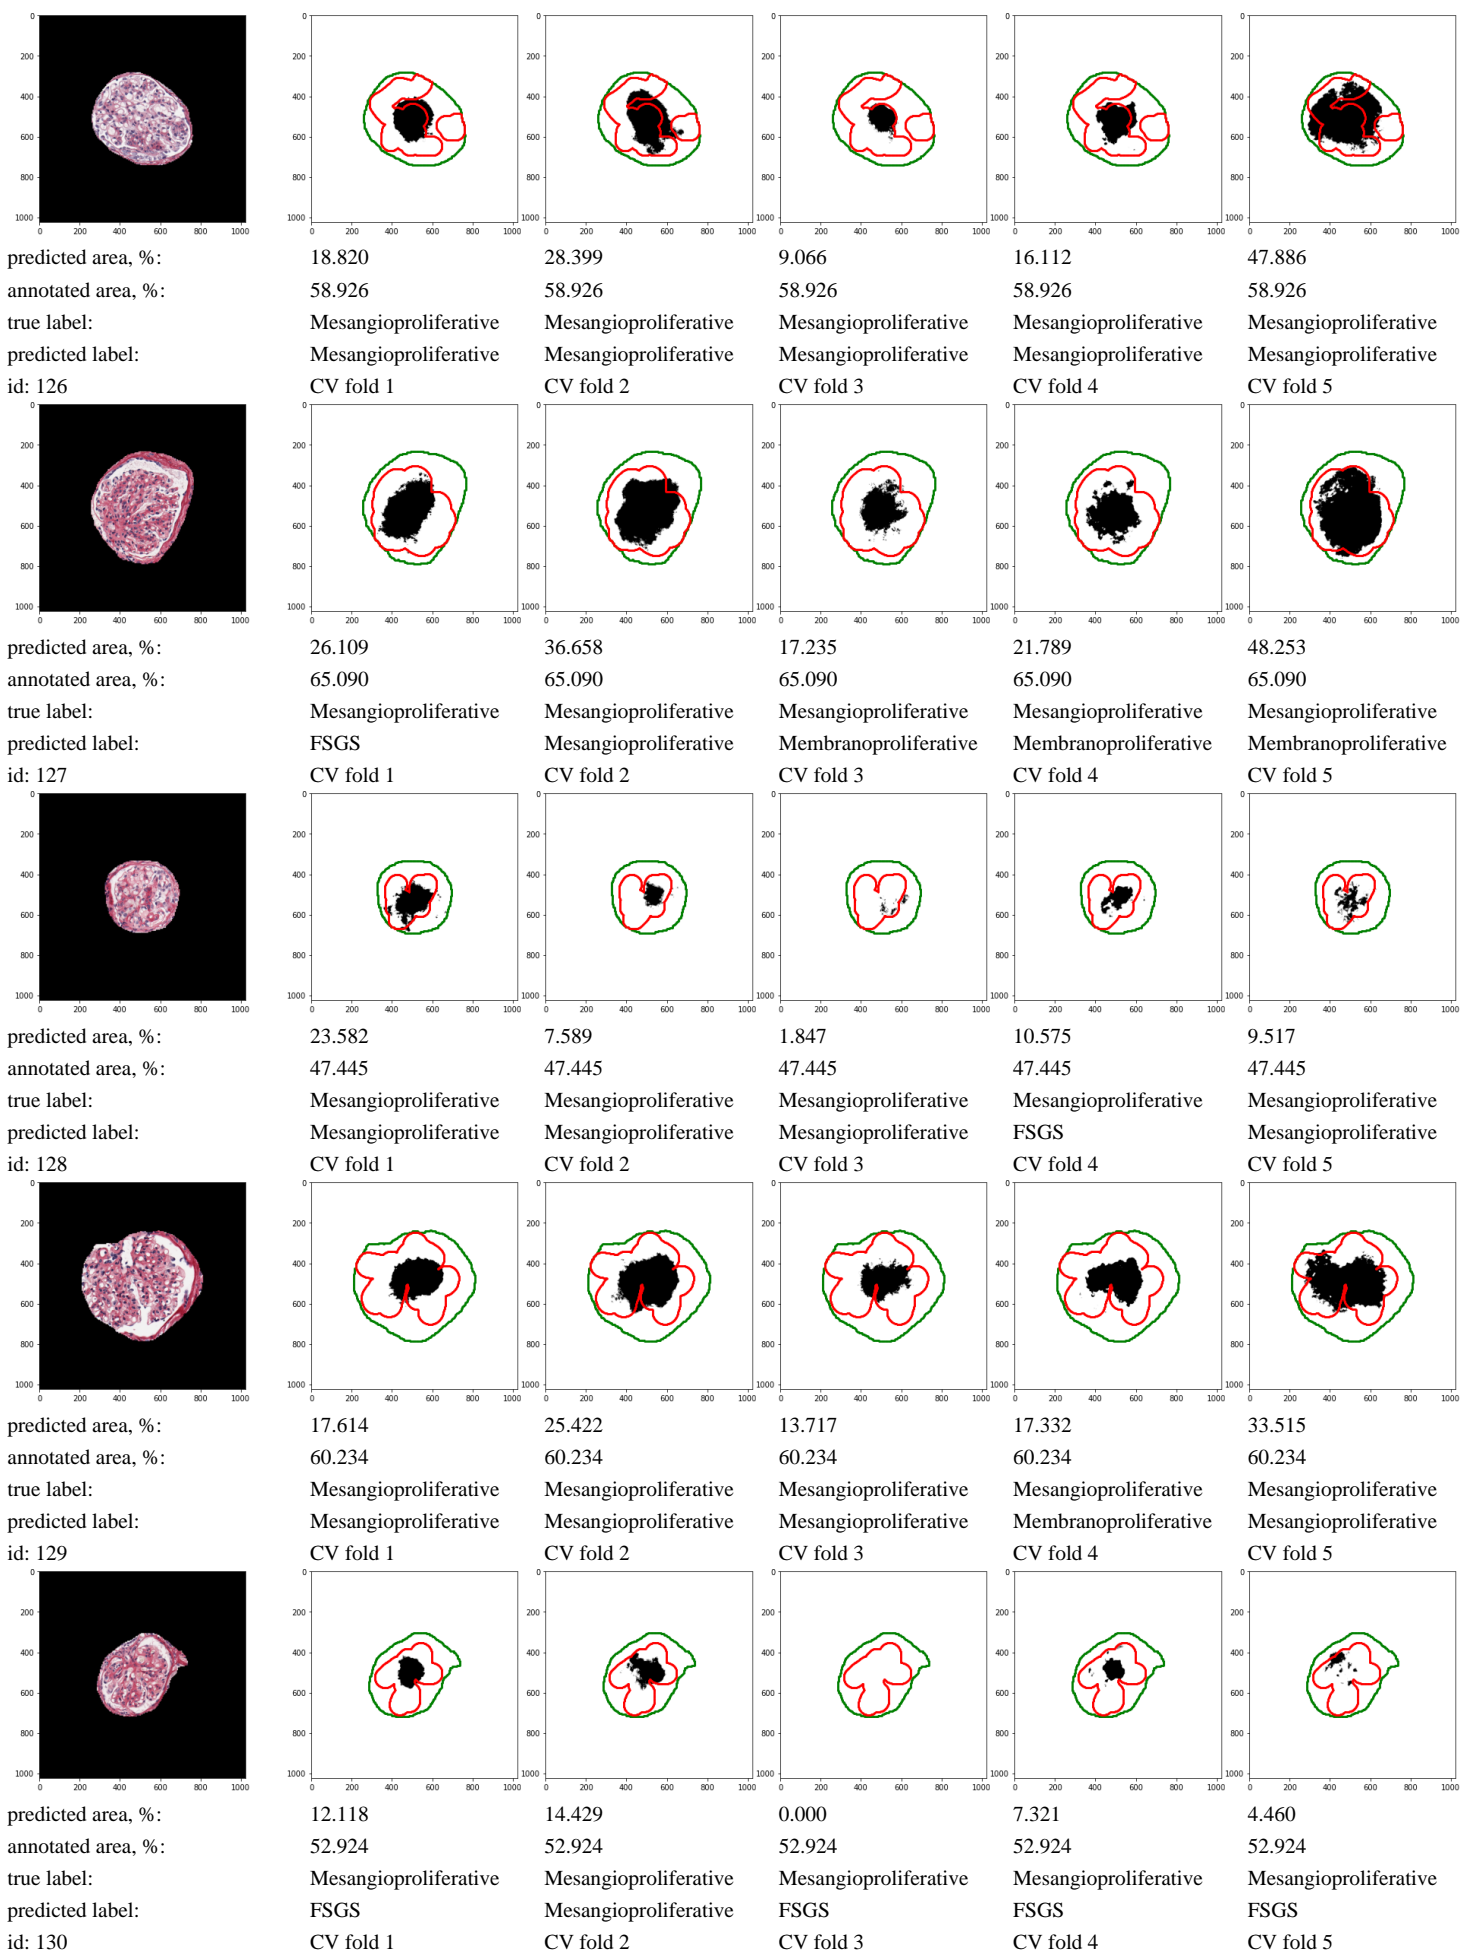

Supplementary Figure S2 (continued). Comparison of pattern quantification results per glomerular basis.

**Red contour:** annotated area @ 0.5 threshold    **Green contour:** total area    **Black fill:** predicted area @ 0.5 threshold

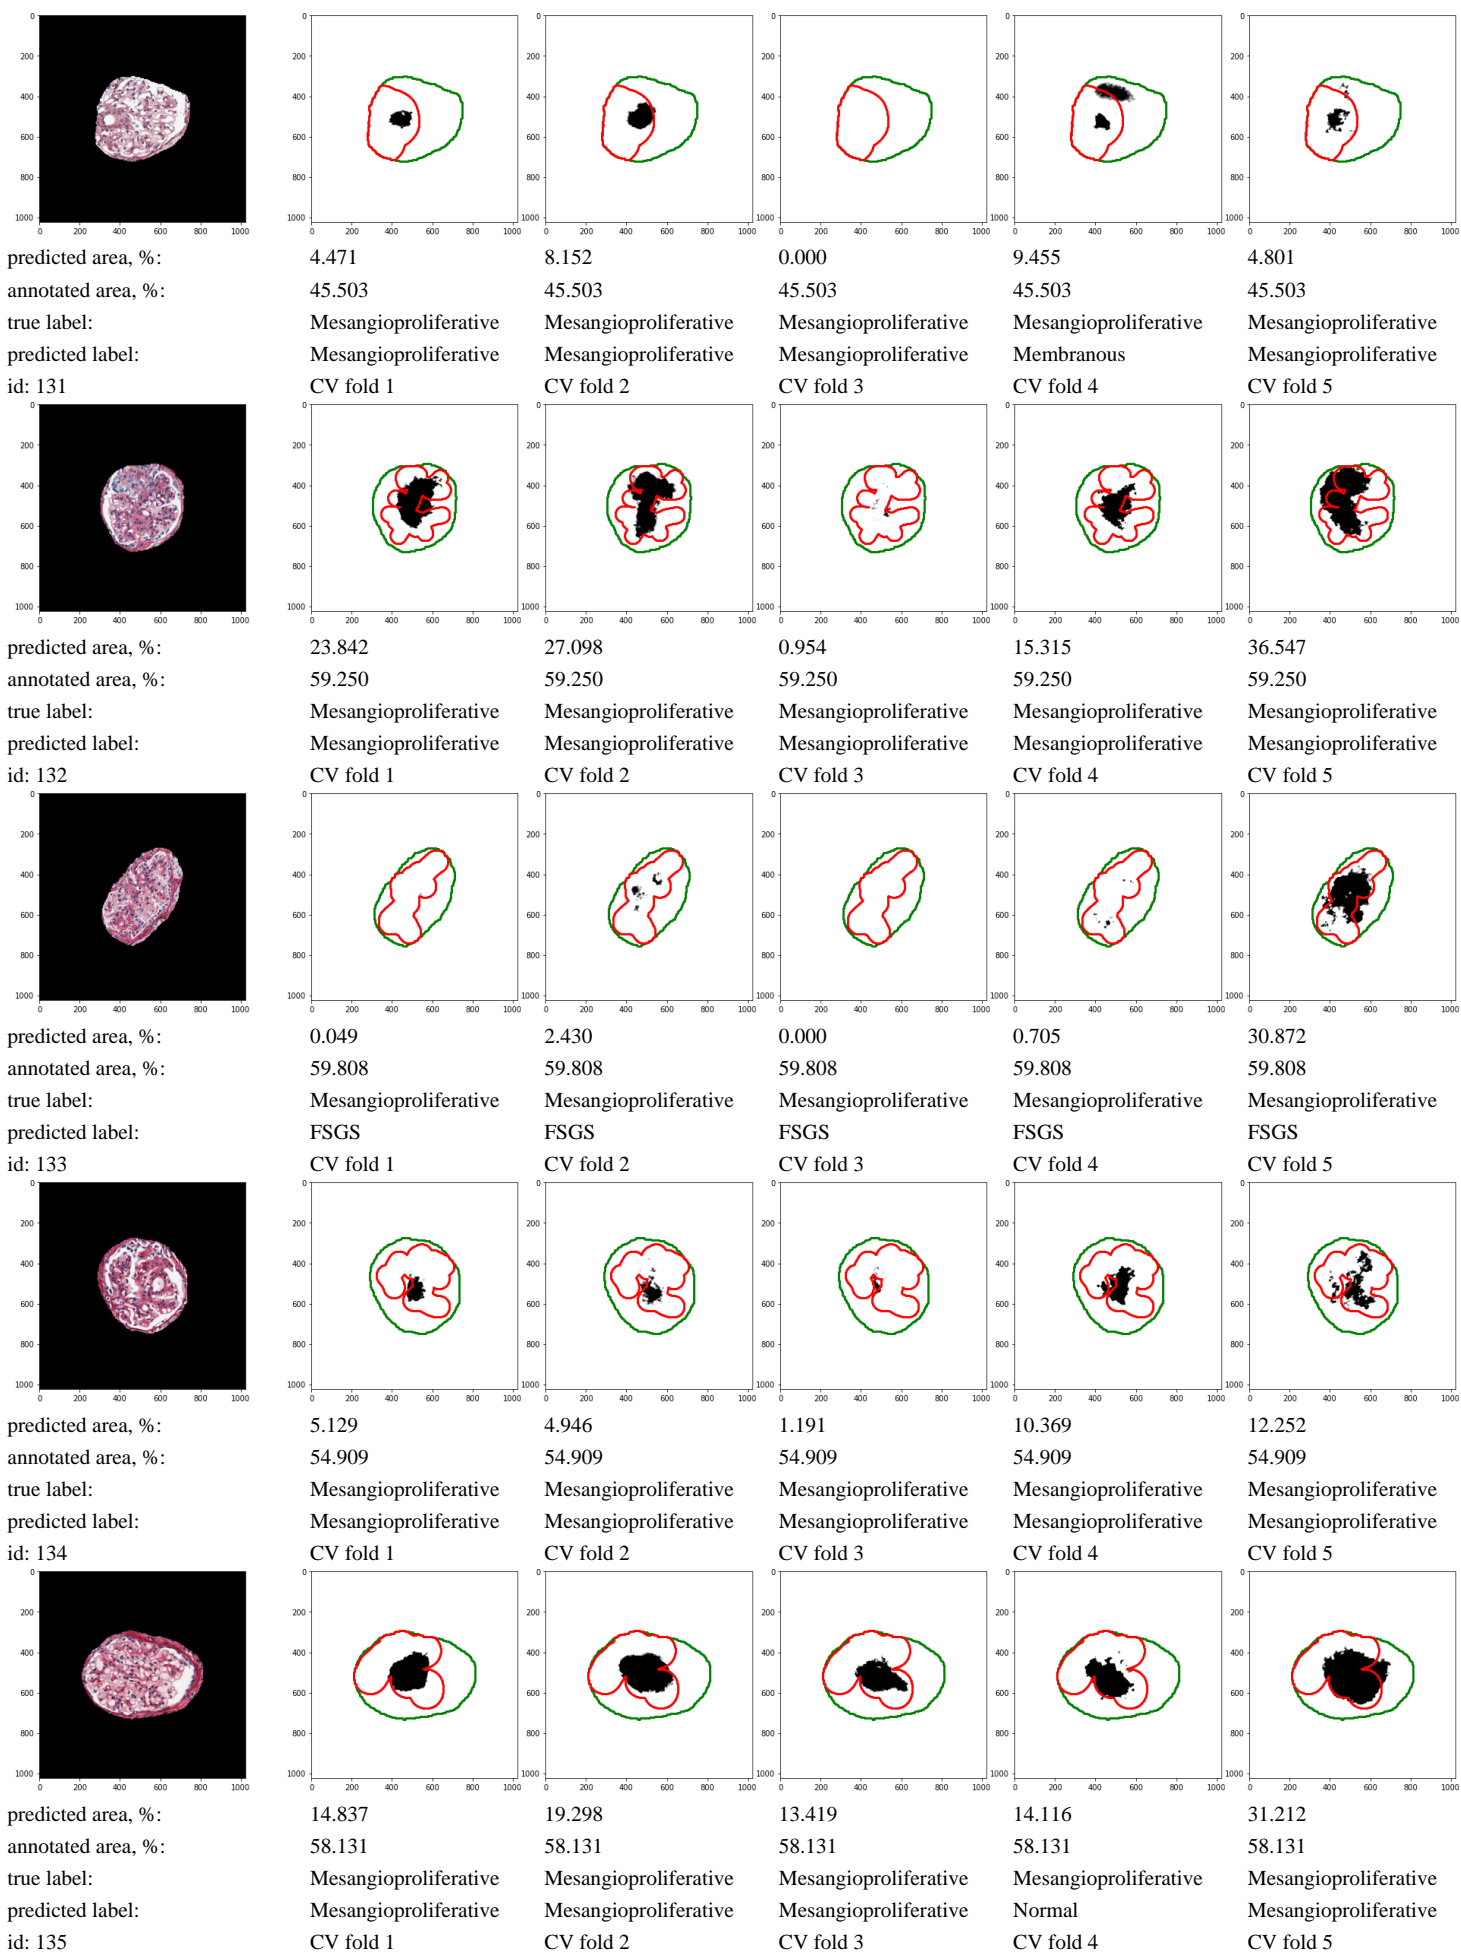

Supplementary Figure S2 (continued). Comparison of pattern quantification results per glomerular basis.

**Red contour:** annotated area @ 0.5 threshold    **Green contour:** total area    **Black fill:** predicted area @ 0.5 threshold

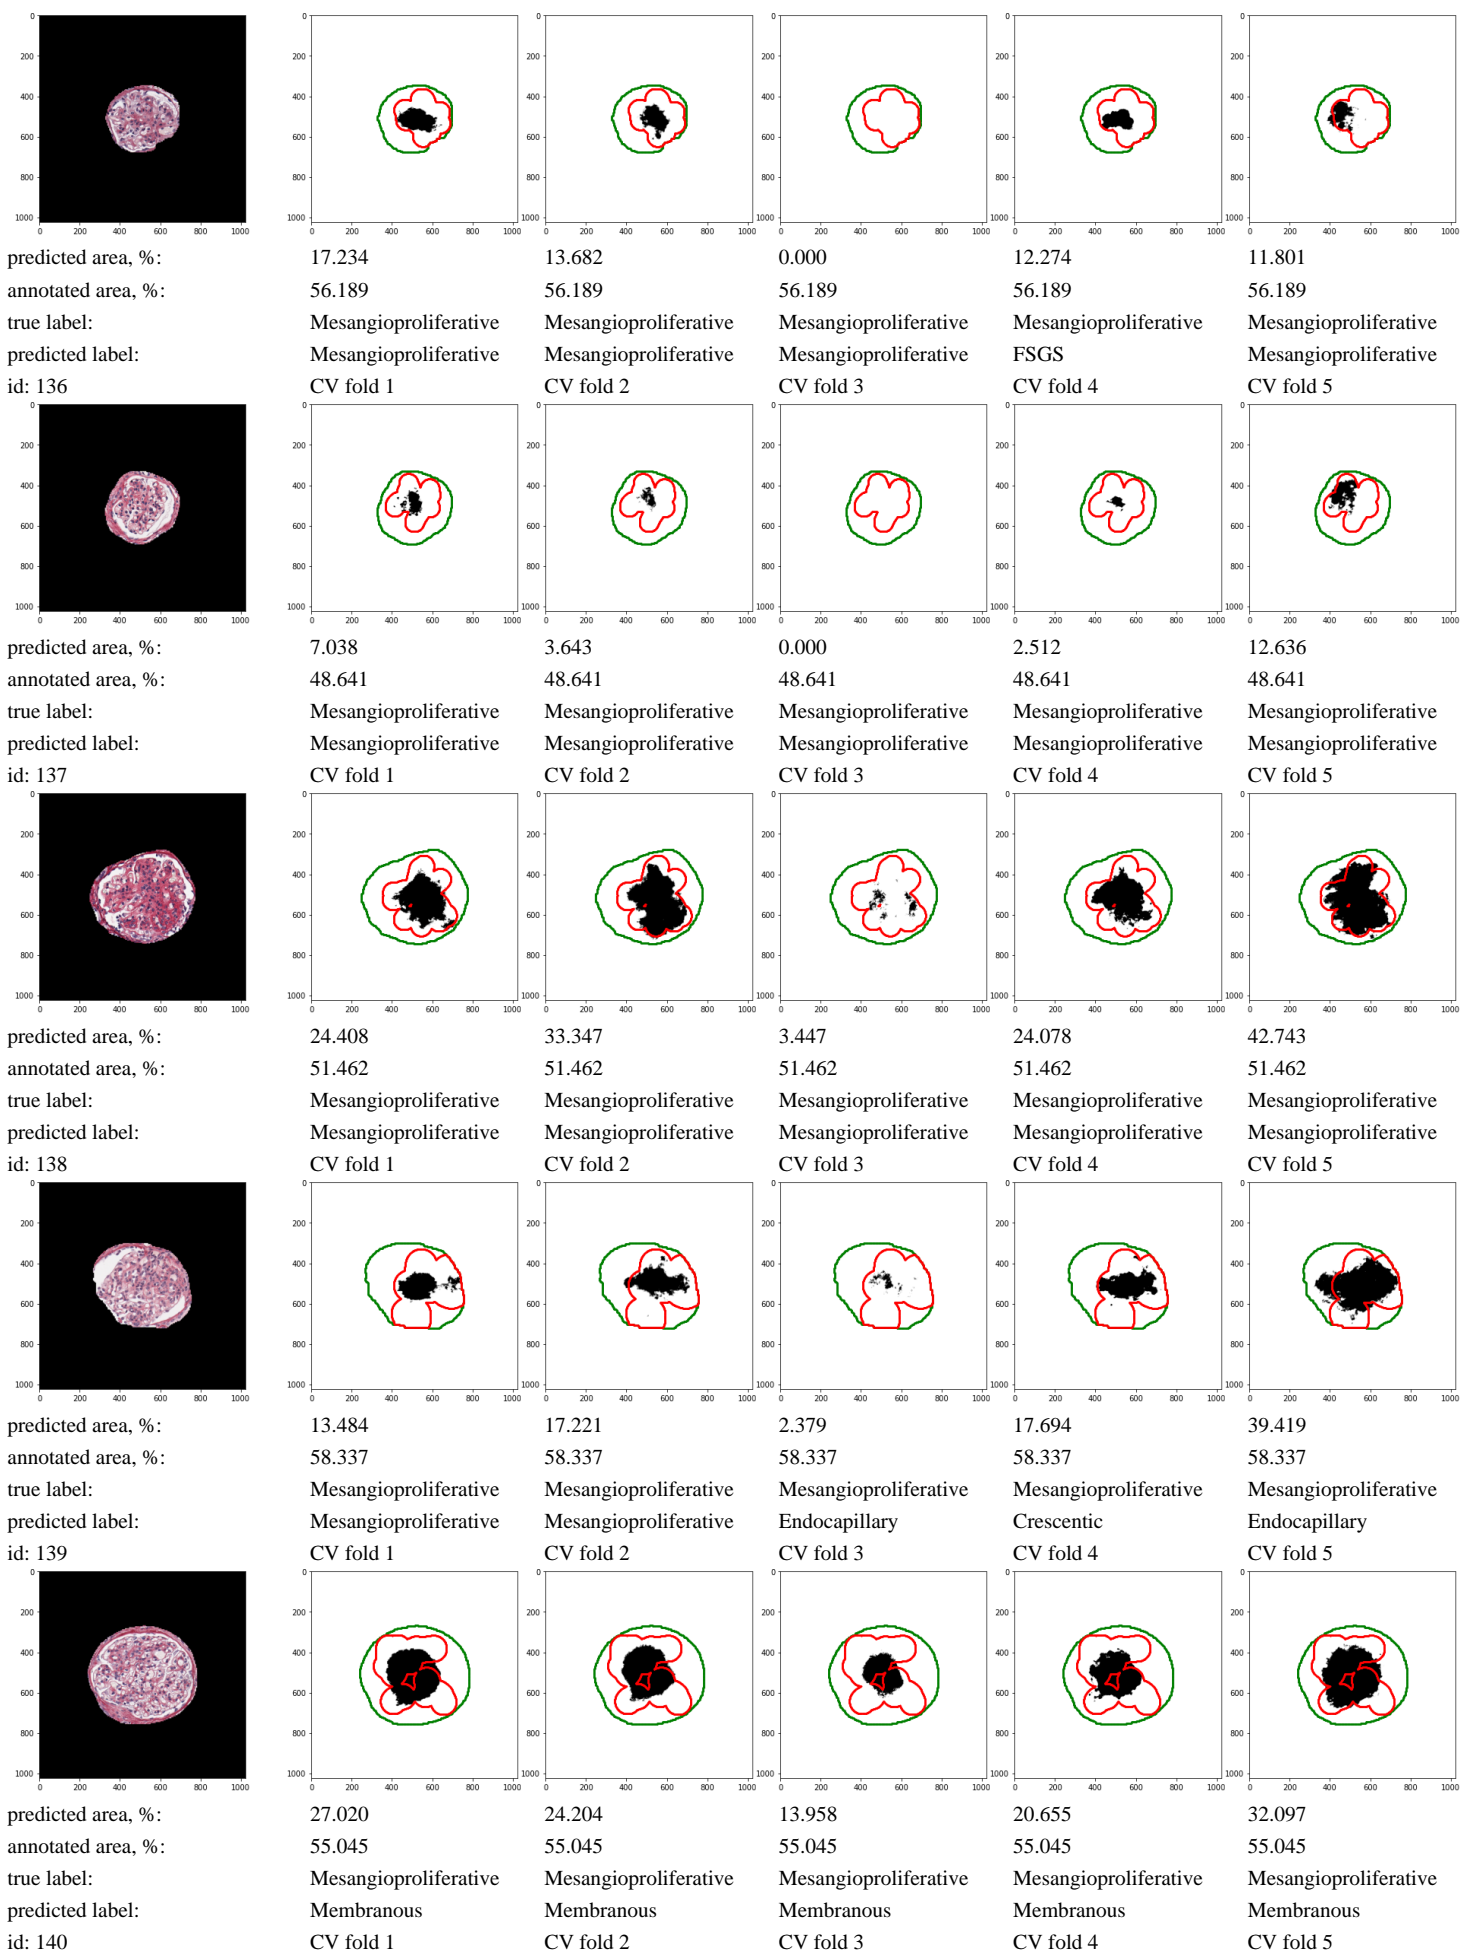

Supplementary Figure S2 (continued). Comparison of pattern quantification results per glomerular basis.

**Red contour:** annotated area @ 0.5 threshold    **Green contour:** total area    **Black fill:** predicted area @ 0.5 threshold





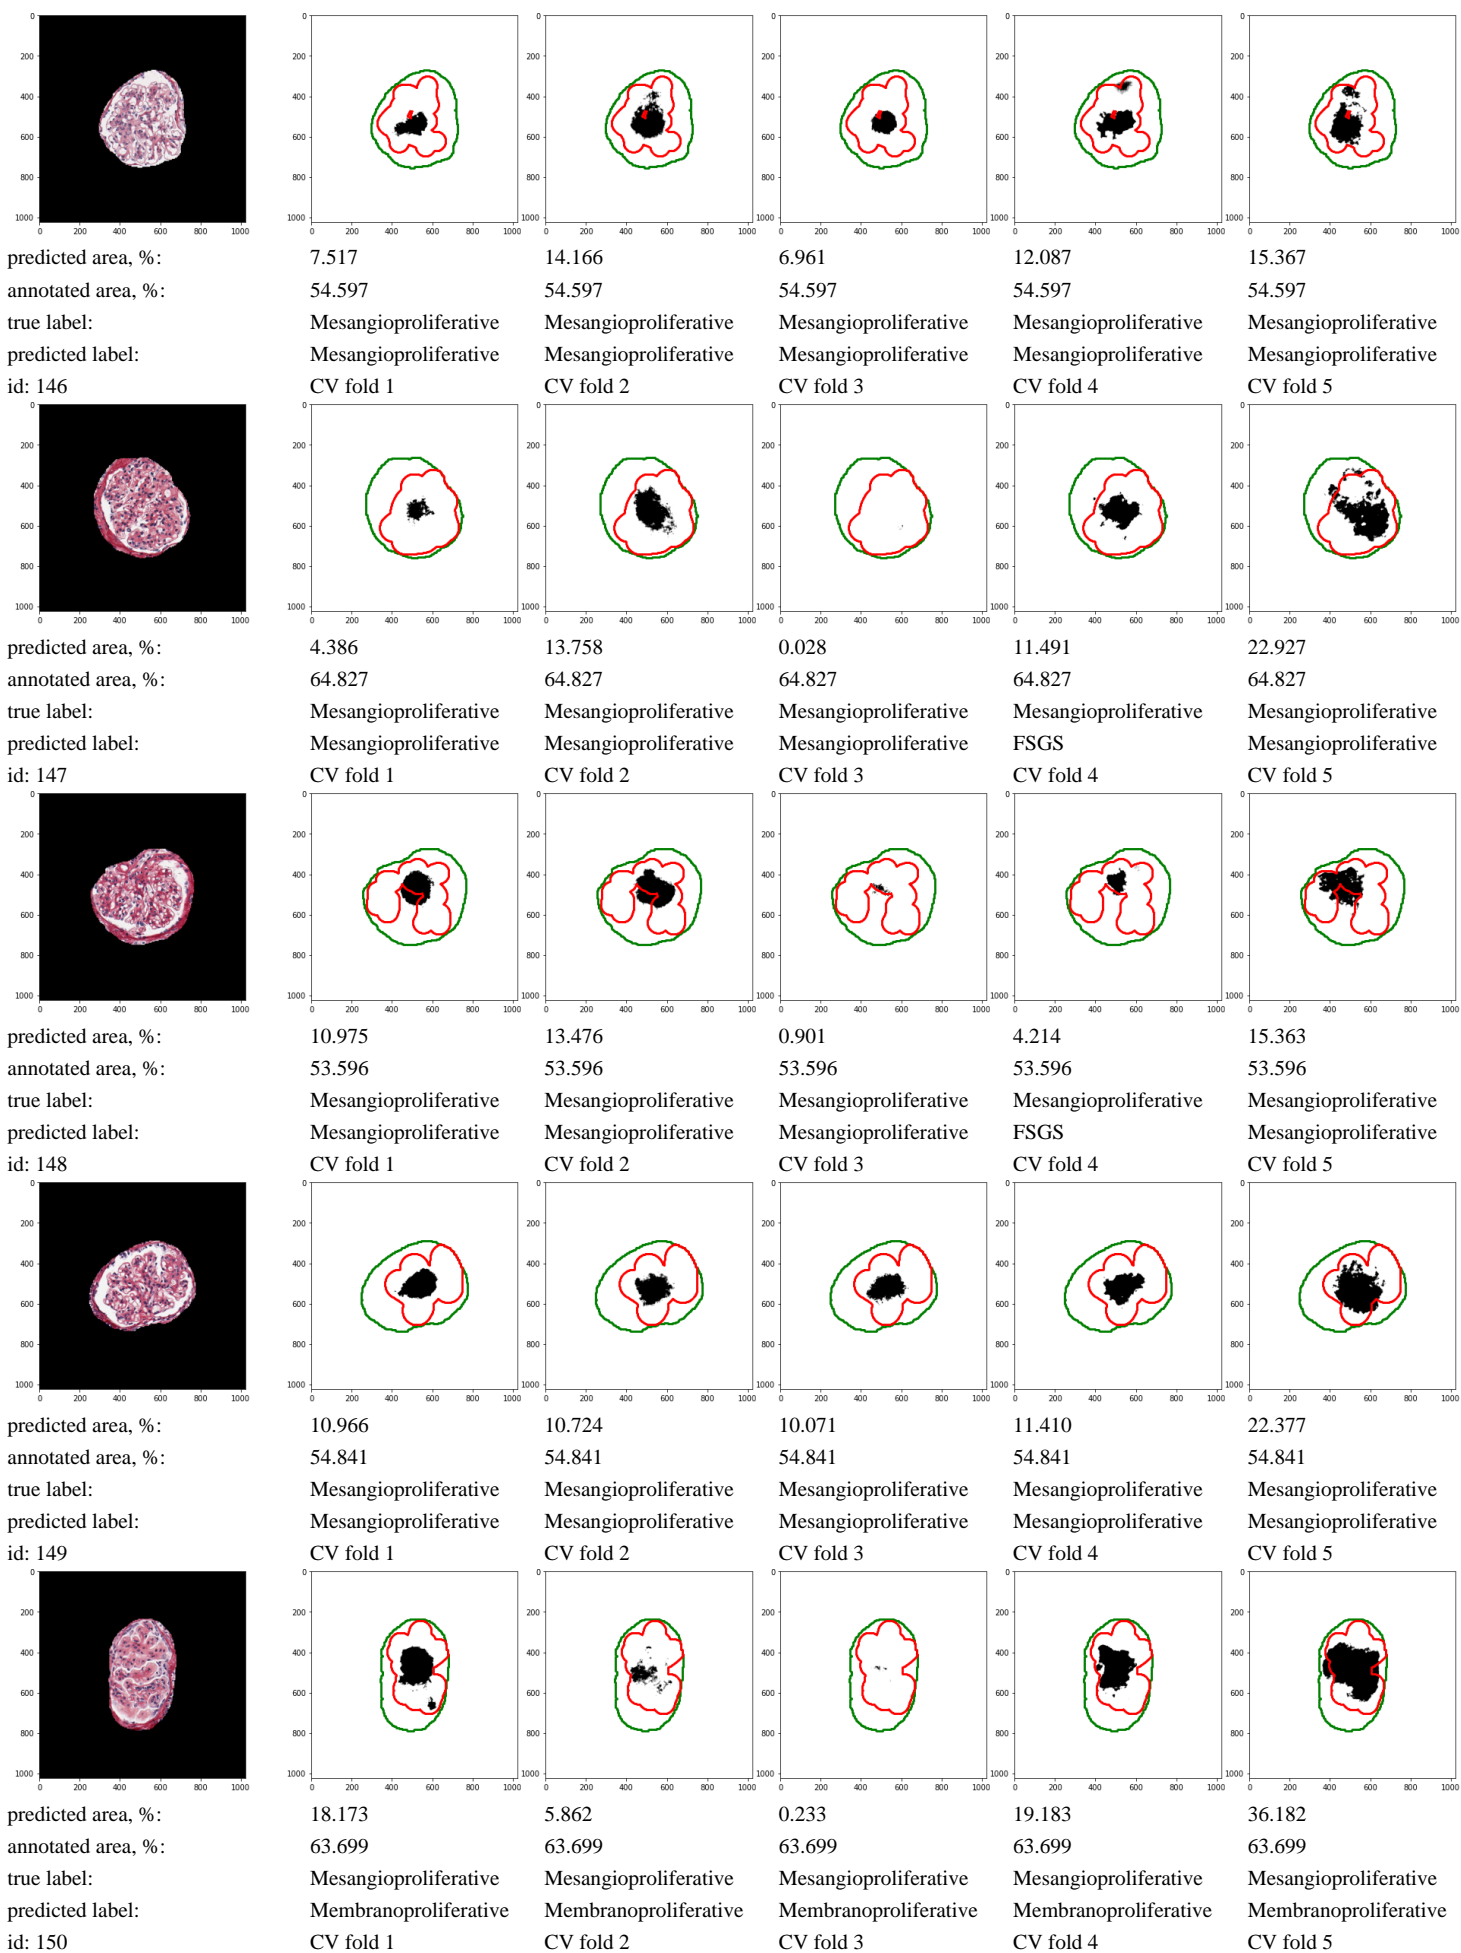

Supplementary Figure S2 (continued). Comparison of pattern quantification results per glomerular basis.

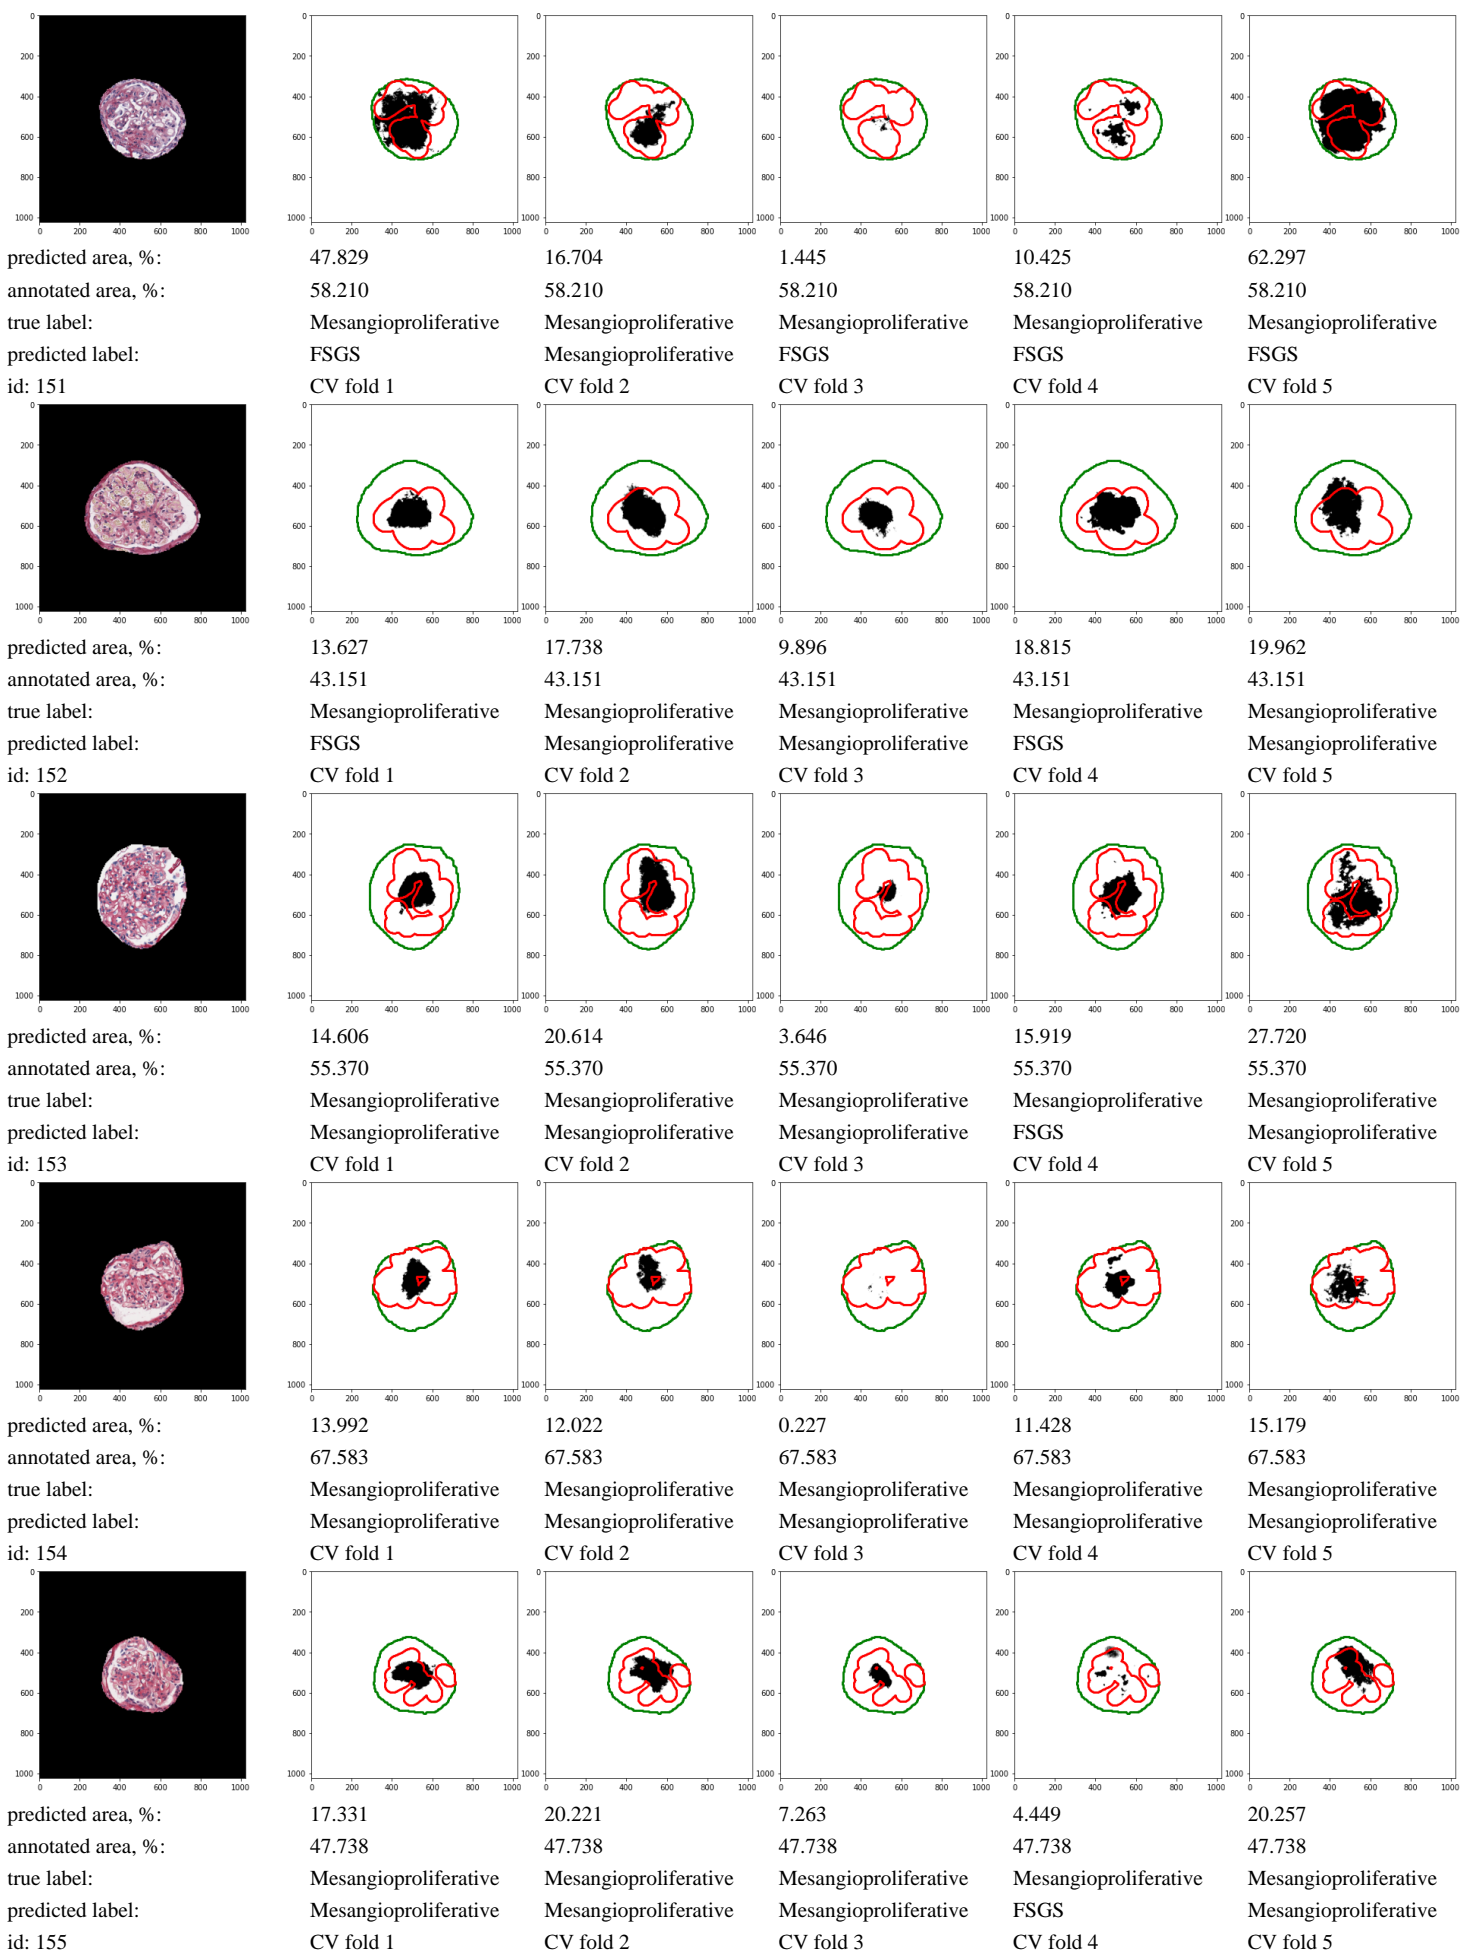

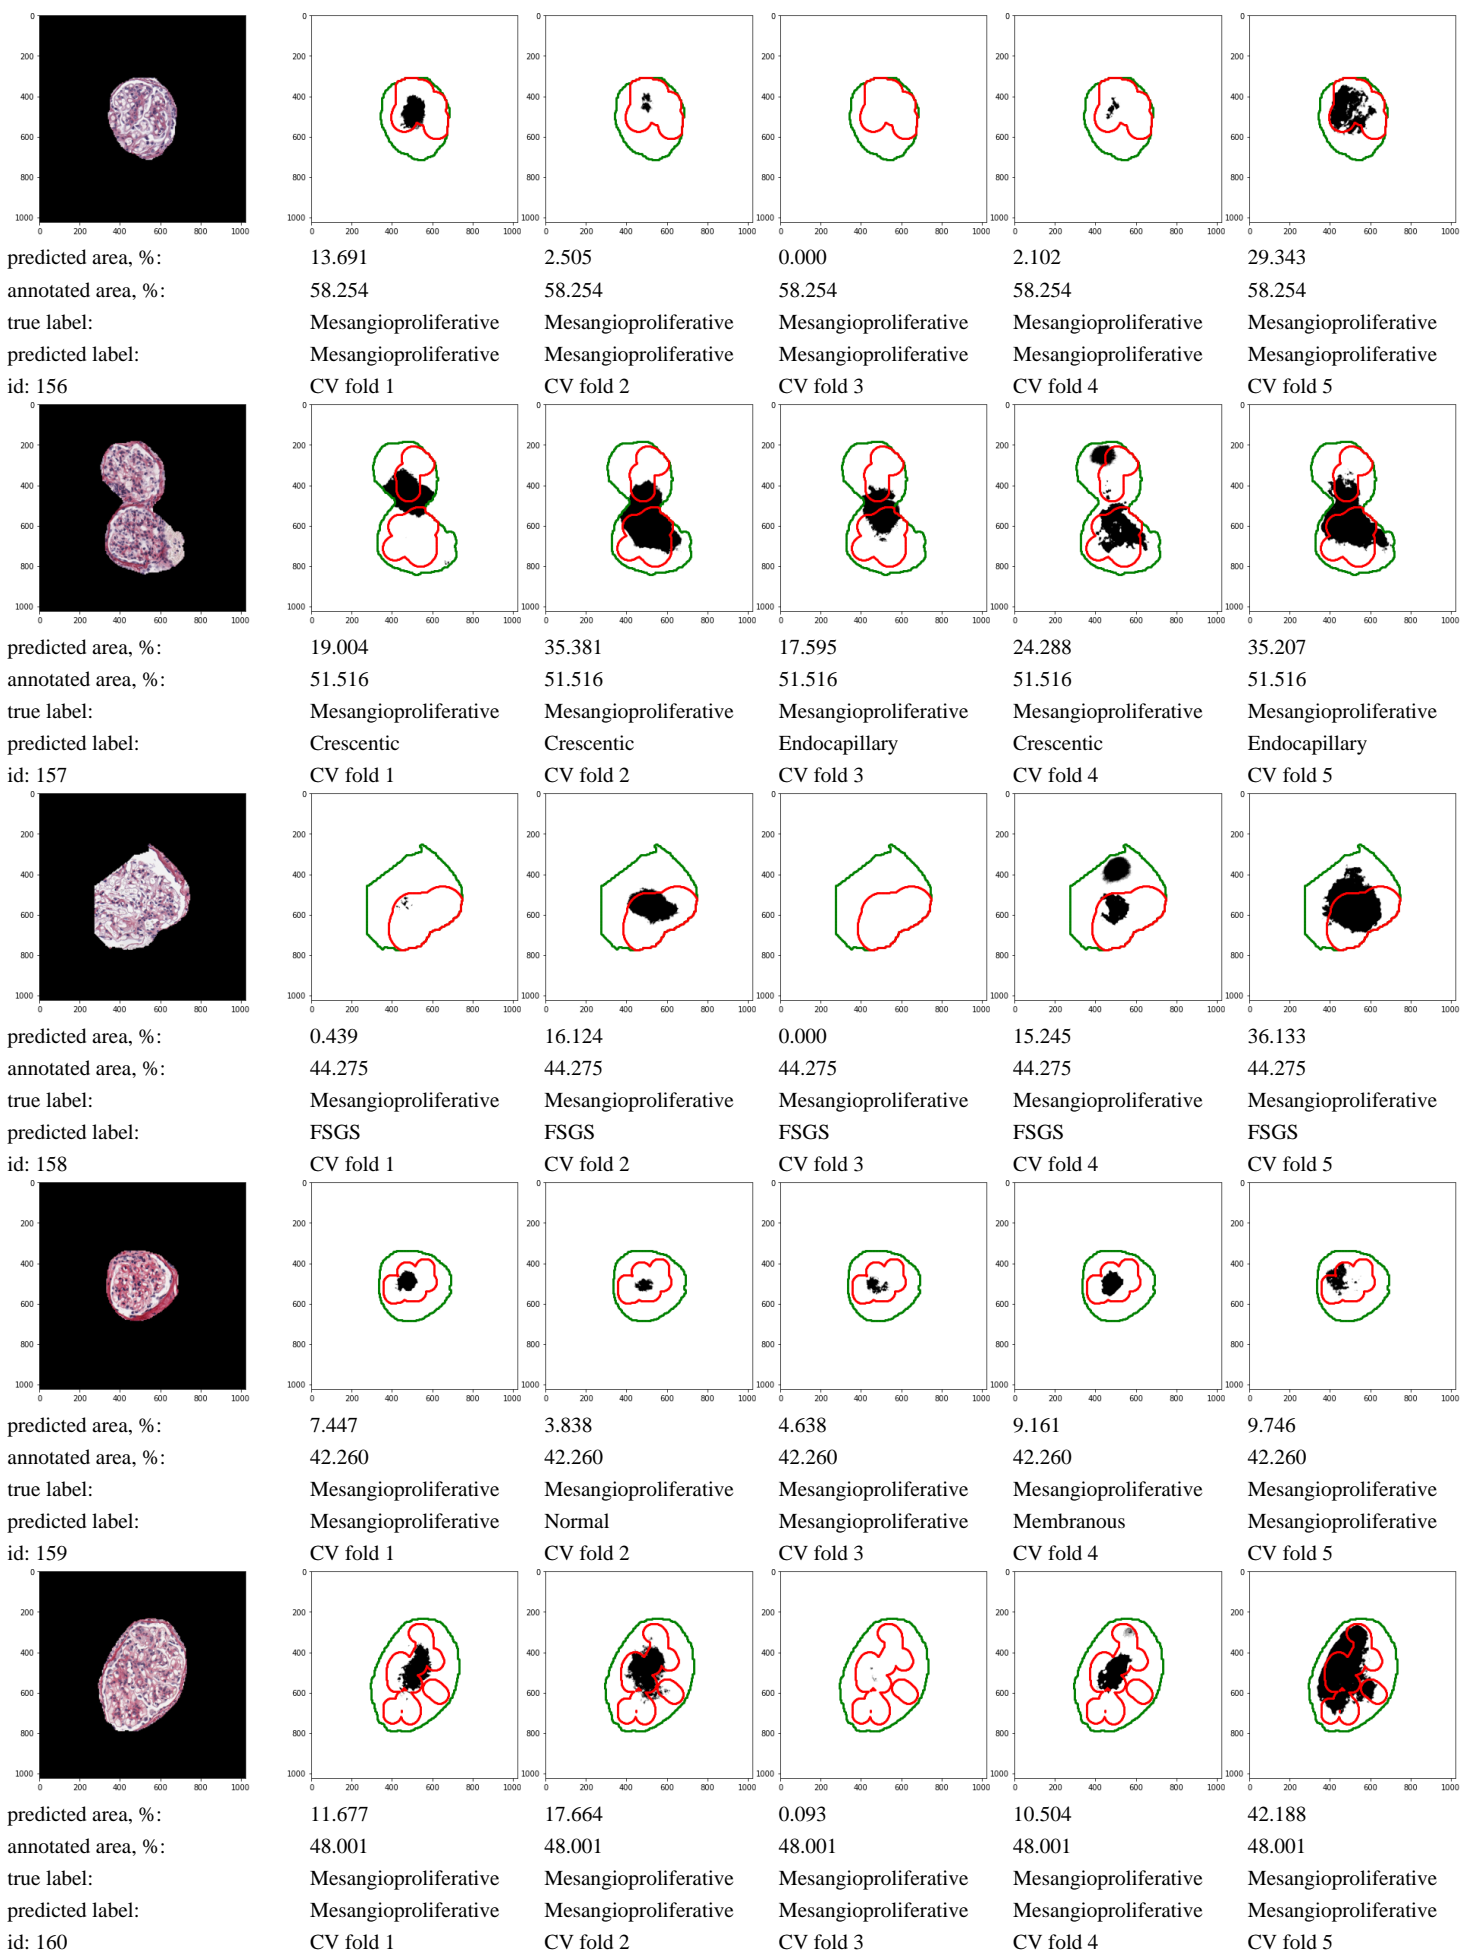

Supplementary Figure S2 (continued). Comparison of pattern quantification results per glomerular basis.

**Red contour:** annotated area @ 0.5 threshold    **Green contour:** total area    **Black fill:** predicted area @ 0.5 threshold

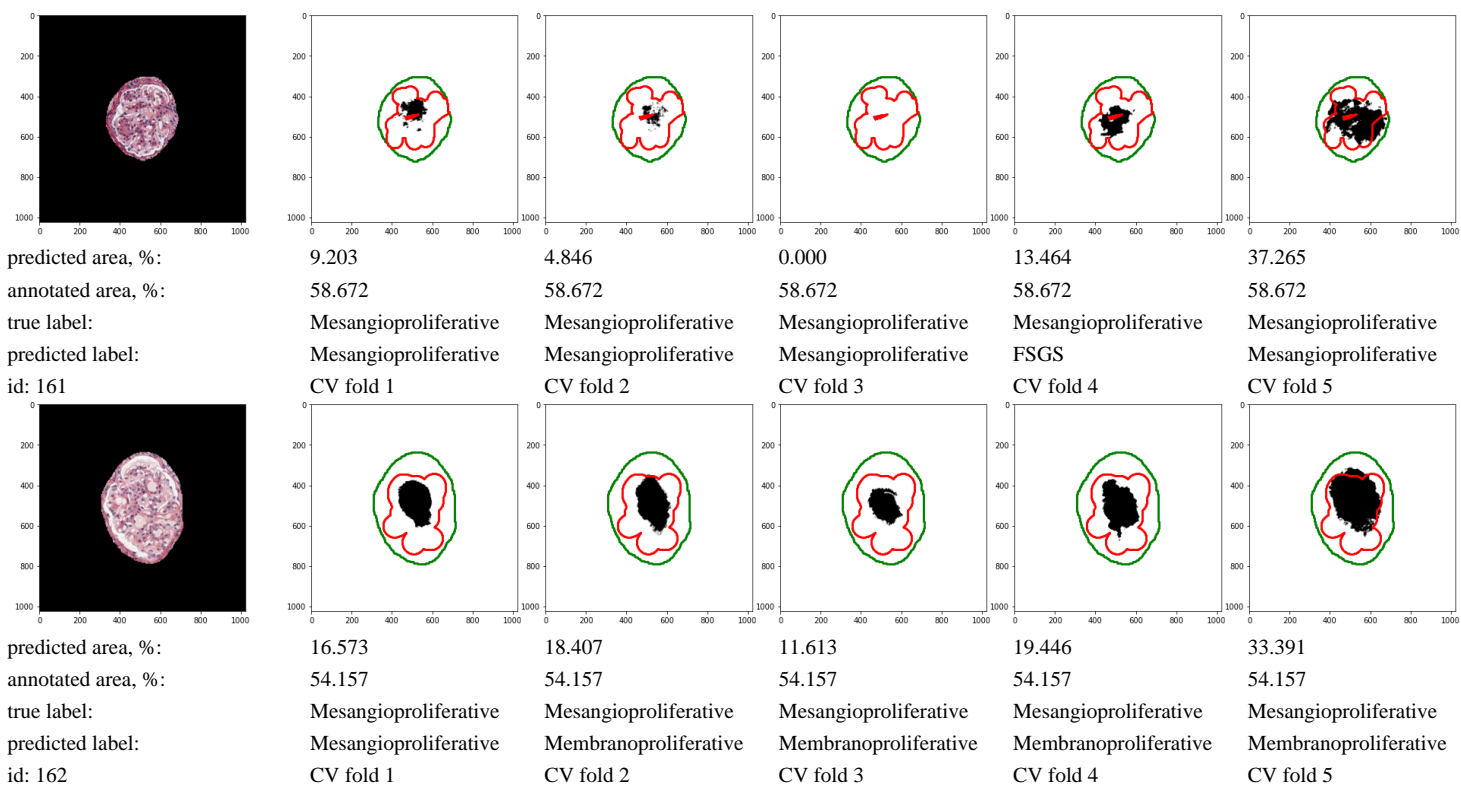

Supplementary Figure S2 (continued). Comparison of pattern quantification results per glomerular basis.

**Red contour:** annotated area @ 0.5 threshold    **Green contour:** total area    **Black fill:** predicted area @ 0.5 threshold
